# Supplementary material for: Ancient implications for today’s precision medicine: How the first Near East farmers shaped the European genetic risk architecture for IBD
Source: Research Square preprint supplement (doi:10.21203/rs.3.rs-2075746/v1), 2022-09-28
Supplement: Supplementary file 1 [file 23da543a301a3a67693d8cd2.xlsx]

## Sheet: Tabelle1
Supplementary Table 3: Functional context of the 97 significant SNVs based on a literature review.
Gene Name	RS ID	Trajectory	SNP	A1	A2	A1 IBD OR	A1 CD OR	A1 UC OR	References for OR values	Variant type	Literature found associations	References for found associations
CAPZB	rs7667	3	1:19718824	A	G		1.11		https://www.sciencedirect.com/science/article/pii/S000292971200105X?via%3Dihub	intron variant	-	-
IL23R	rs11209026	2	1:67705958	A	G	0.496771	0.37594	0.574713	https://www.nature.com/articles/nature11582 ; https://www.nature.com/articles/ng.717 ; https://www.nature.com/articles/ng.764	missense variant	microbiome and immunity	https://www.ncbi.nlm.nih.gov/pmc/articles/PMC3043090/; https://academic.oup.com/ecco-jcc/article/13/4/451/5184638
IL23R	rs10789230	6	1:67730628	T	G		1.48		https://www.pnas.org/doi/full/10.1073/pnas.0706645104	intergenic region	microbiome and immunity	https://www.ncbi.nlm.nih.gov/pmc/articles/PMC3043090/; https://academic.oup.com/ecco-jcc/article/13/4/451/5184638
GIPC2-MGC27382	rs17391694	3	1:78623626	T	C		0.881834		https://www.nature.com/articles/nature11582	intergenic region	-	-
PTPN22	rs2476601	2	1:114377568	A	G		0.793651		https://www.nature.com/articles/ng.717	missence variant	microbiome and immunity	https://www.ncbi.nlm.nih.gov/pmc/articles/PMC6402334/; https://journals.plos.org/plosone/article?id=10.1371/journal.pone.0199664
RORC	rs4845604	2	1:151801680	A	G	0.883741	0.912753	0.849001	https://www.nature.com/articles/ng.3359	intron variant	microbiome and immunity	https://www.ncbi.nlm.nih.gov/pmc/articles/PMC4668938/; https://www.science.org/doi/10.1126/science.aac4263; https://www.science.org/doi/10.1126/science.aaa9420
FCGR2A	rs1801274	1	1:161479745	A	G	1.124	1.08166	1.18637	https://www.nature.com/articles/nature11582 ; https://www.nature.com/articles/ng.3359	missense variant	microbiome and immunity	https://www.frontiersin.org/articles/10.3389/fcimb.2020.607348/full; https://www.ncbi.nlm.nih.gov/pmc/articles/PMC7137230/; https://jmg.bmj.com/content/47/7/471; https://www.ncbi.nlm.nih.gov/pmc/articles/PMC6473071/
PLA2G4A	rs10798069	3	1:186875459	T	G	0.950183	0.932033		https://www.nature.com/articles/ng.3359	intron variant	microbiome and immunity	https://journals.plos.org/plosone/article?id=10.1371/journal.pone.0133663; https://www.nature.com/articles/s41564-022-01121-z; https://www.sciencedirect.com/science/article/pii/S1934590916301072?via%3Dihub
ATP6V1G3-PTPRC	rs7555082	1	1:198598663	A	G	1.10069	1.13175		https://www.nature.com/articles/ng.3359	intergenic region	microbiome and immunity	https://www.genecards.org/cgi-bin/carddisp.pl?gene=PTPRC; https://www.sciencedirect.com/science/article/pii/S0021925820869440?via%3Dihub; https://www.frontiersin.org/articles/10.3389/fmicb.2018.01900/full;https://pubmed.ncbi.nlm.nih.gov/16505159/
NR5A2	rs2816958	2	1:200101920	A	G	0.905741		0.834582	https://www.nature.com/articles/nature11582	intron variant	microbiome and immunity	https://www.science.org/doi/10.1126/sciadv.aav9732;
DNMT3A	rs13428812	2	2:25492467	G	A		1.06		https://www.nature.com/articles/ng.717	intron variant	microbiome and immunity	https://microbiomejournal.biomedcentral.com/articles/10.1186/s40168-020-00847-4#Sec21; https://www.ncbi.nlm.nih.gov/pmc/articles/PMC5899322/
FOSL2	rs925255	3	2:28614794	T	C	0.915751	0.904798		https://www.nature.com/articles/nature11582 ; https://www.nature.com/articles/ng.3359	intergenic region	microbiome and immunity	https://pubs.acs.org/doi/10.1021/acsomega.1c03681; https://www.nature.com/articles/s41564-019-0659-3
PLCL1	rs1440088	2	2:198871417	G	T			0.922501	https://www.nature.com/articles/ng.3359	intron variant	microbiome and immunity	https://www.sciencedirect.com/science/article/pii/S0197018619301238; https://www.frontiersin.org/articles/10.3389/fnut.2021.743343/full
CD28	rs3116494	2	2:204592021	G	A	1.06077		1.08031	https://www.nature.com/articles/ng.3359	intron variant	microbiome and immunity	https://elifesciences.org/articles/03180; https://academic.oup.com/intimm/article/30/4/171/4841684
ATG16L1	rs12994997	2	2:234173503	A	G	1.14295	1.233		https://www.nature.com/articles/ng.3359 ; https://www.nature.com/articles/nature11582	intron variant	microbiome and immunity	https://elifesciences.org/articles/39982;
GPR35-AQP12B	rs4676406	2	2:241579108	G	T		0.877193		https://www.nature.com/articles/ng.764.pdf	-	microbiome and immunity	https://www.ncbi.nlm.nih.gov/pmc/articles/PMC8591220/; https://www.nature.com/articles/s42003-021-02014-3
SATB1-AS1-KCNH8	rs4256159	1	3:18767404	T	C	1.107	1.154		https://www.nature.com/articles/nature11582	intergenic region	immunity	https://www.ncbi.nlm.nih.gov/pmc/articles/PMC4069958/
CELSR3	rs9868809	1	3:48681053	T	C	1.14707	1.12409	1.15702	https://www.nature.com/articles/ng.3359	synonymous variant	microbiome	https://link.springer.com/article/10.1007/s00018-021-03812-y
BSN	rs9858542	1	3:49701983	A	G		1.09		https://www.nature.com/articles/nature05911	synonymous variant	-	-
RFT1	rs2581828	5	3:53133149	C	G		1.1		https://www.nature.com/articles/ng.3760	intron variant	microbiome	https://www.frontiersin.org/articles/10.3389/fgene.2015.00148/full
IMPG2	rs503734	3	3:101023748	G	A	0.934579			https://www.nature.com/articles/ng.3760	intron variant	-	-
NFKBIZ	rs616597	2	3:101569726	A	C			0.934449	https://www.nature.com/articles/ng.3359	intron variant	microbiome and immunity	https://www.nature.com/articles/s41598-017-05740-z
PPBP	rs2457996	1	4:74856535	C	T			0.901355	https://www.nature.com/articles/ng.3359	intergenic region	microbiome and immunity	https://www.ncbi.nlm.nih.gov/pmc/articles/PMC5502958/
ADAD1	rs1479918	1	4:123351431	T	A				https://www.nature.com/articles/ng.3359	intergenic region	immunity	https://www.ncbi.nlm.nih.gov/pmc/articles/PMC2785566/
MIR4456-LOC100996325	rs4957048	1	5:583442	A	G			1.11	https://www.nature.com/articles/ng.549	intergenic region	-	-
MIR4456-LOC100996325	rs11739663	1	5:594083	C	T			0.933707	https://www.nature.com/articles/nature11582	intergenic region	-	-
ERAP2	rs2549794	5	5:96244549	C	T		1.05		https://www.nature.com/articles/ng.717	intron variant	microbiome and immunity	https://www.ncbi.nlm.nih.gov/pmc/articles/PMC6646713/; https://www.frontiersin.org/articles/10.3389/fgene.2020.566190/full; https://www.frontiersin.org/articles/10.3389/fimmu.2018.02463/full
IRF1-AS1	rs6596075	3	5:131742228	G	C		0.645161		https://www.nature.com/articles/nature05911	intergenic region	immunity	https://www.frontiersin.org/articles/10.3389/fimmu.2022.829335/full
IRF1-AS1	rs2188962	1	5:131770805	T	C	1.158	1.224	1.081	https://www.nature.com/articles/nature11582	intron variant	immunity	https://www.frontiersin.org/articles/10.3389/fimmu.2022.829335/full
IRF1-AS1	rs12521868	1	5:131784393	T	G		1.23		https://www.nature.com/articles/ng.717	intron variant	immunity	https://www.frontiersin.org/articles/10.3389/fimmu.2022.829335/full
NDFIP1	rs449454	2	5:141533062	A	G				https://www.nature.com/articles/ng.3359	3 prime UTR variant	immunity	https://www.ncbi.nlm.nih.gov/pmc/articles/PMC3323617/
IRGM	rs11741861	2	5:150277909	G	A	1.249	1.324	1.151	https://www.nature.com/articles/nature11582	intron variant	microbiome and immunity	https://www.ncbi.nlm.nih.gov/pmc/articles/PMC5671819/; https://www.frontiersin.org/articles/10.3389/fimmu.2012.00426/full; https://www.ncbi.nlm.nih.gov/pmc/articles/PMC5671819/; https://www.frontiersin.org/articles/10.3389/fimmu.2012.00426/full
LOC285626-LINC01845	rs10045431	3	5:158814533	A	C		0.900901		https://www.nature.com/articles/ng.175	intergenic region	-	-
DUSP22-IRF4	rs7773324	3	6:382559	G	A	0.940054	0.924277		https://www.nature.com/articles/ng.3359	intergenic region	-	-
LINC01108-JARID2	rs17119	3	6:14719496	G	A	0.933707	0.925069	0.946074	https://www.nature.com/articles/nature11582	intergenic region	-	-
CDKAL1	rs9358372	5	6:20812588	G	A	1.089	1.107		https://www.nature.com/articles/nature11582	intron variant	-	-
LINC02571	rs9264942	2	6:31274380	C	T	1.084	1.145		https://www.nature.com/articles/nature11582	intergenic region	-	-
LOC100287329	rs1799964	6	6:31542308	C	T		1.19		https://www.nature.com/articles/ng.717	intergenic region	-	-
HLA-DRA-HLA-DRB5	rs9268877	1	6:32431147	A	G			1.45	https://www.nature.com/articles/ng.221	intergenic region	microbiome and immunity	https://www.ncbi.nlm.nih.gov/gene/3127
HLA-DQB1-HLA-DQA2	rs9469220	1	6:32658310	G	A		0.877193		https://www.nature.com/articles/nature05911	intergenic region	microbiome and immunity	https://www.ncbi.nlm.nih.gov/gene/3118; https://onlinelibrary.wiley.com/doi/10.1111/j.1399-0039.2007.00986.x
VEGFA-LINC02537	rs943072	4	6:43795968	G	T			1.15	https://www.nature.com/articles/ng.764	intergenic region	microbiome and immunity	https://onlinelibrary.wiley.com/doi/10.1111/j.1399-0039.2007.00986.x; https://www.ncbi.nlm.nih.gov/gene/3119
RSPO3	rs2503322	3	6:127457260	A	G		0.936596		https://www.nature.com/articles/ng.3359	intron variant	immunity	https://www.ncbi.nlm.nih.gov/pmc/articles/PMC9251867/
OLIG3-LOC102723649	rs6933404	3	6:137959235	C	T				https://www.nature.com/articles/ng.3359	intergenic region	microbiome and immunity	https://genomemedicine.biomedcentral.com/track/pdf/10.1186/s13073-014-0107-1.pdf
PHACTR2-AS1-PHACTR2	rs12199775	3	6:143898894	G	A	0.88574	0.870322		https://www.nature.com/articles/nature11582	intergenic region	-	-
TAGAP-LOC101929122	rs212388	5	6:159490436	C	T	1.05516	1.1078		https://www.nature.com/articles/ng.3359	intergenic region	immunity	https://www.nature.com/articles/s41467-020-15564-7
HOXA11-AS	rs4722672	4	7:27231762	C	T			1.091	https://www.nature.com/articles/nature11582	intergenic region	-	-
SPATA48-IKZF1	rs1456896	4	7:50304461	C	T	0.924604	0.906914		https://www.nature.com/articles/ng.3359	intergenic region	immunity	https://www.ncbi.nlm.nih.gov/pmc/articles/PMC7394939/
SMURF1-KPNA7	rs9297145	1	7:98759117	C	A	1.082	1.085	1.075	https://www.nature.com/articles/nature11582	intergenic region	immunity	https://www.ncbi.nlm.nih.gov/pmc/articles/PMC5699477/
FOXP2-MDFIC	rs1869839	3	7:114357543	G	A		0.83		https://gut.bmj.com/content/62/10/1440	intergenic region	-	-
IRF5	rs4728142	3	7:128573967	A	G	1.05204		1.10182	https://www.nature.com/articles/ng.3359	intergenic region	microbiome and immunity	https://www.ncbi.nlm.nih.gov/pmc/articles/PMC6585431/
UBE2V2-LOC101929268	rs7011507	2	8:49129242	A	G	0.918879		0.901338	https://www.nature.com/articles/ng.3359	intergenic region	-	-
LINC00824	rs6651252	3	8:129567181	C	T	0.892061	0.843882		https://www.nature.com/articles/nature11582	intron variant	-	-
TNFSF15	rs6478109	4	9:117568766	A	G	0.733	0.48		https://www.ncbi.nlm.nih.gov/pmc/articles/PMC2770437/	intergenic region	microbiome and immunity	https://www.sciencedirect.com/science/article/pii/S2352345X20301272
TNFSF15-TNFSF8	rs13300483	1	9:117643362	T	C	1.0976	1.14067		https://www.nature.com/articles/ng.3359	intergenic region	microbiome and immunity	https://www.sciencedirect.com/science/article/pii/S2352345X20301272
IL2RA	rs61839660	2	10:6094697	T	C		1.198	1.022	https://www.nature.com/articles/ng.3528	intron variant	microbiome and immunity	https://www.ncbi.nlm.nih.gov/pmc/articles/PMC3594590/; https://microbiomejournal.biomedcentral.com/articles/10.1186/s40168-016-0227-5
ZNF365-ADO	rs10761659	4	10:64445564	A	G	0.857434	0.834853	0.889305	https://www.nature.com/articles/ng.3359	intergenic region	immunity	https://pubmed.ncbi.nlm.nih.gov/29042450/
ZNF365-ADO	rs224090	1	10:64541319	T	C	1.10111	1.13765		https://www.nature.com/articles/ng.3359	intergenic region	immunity	https://pubmed.ncbi.nlm.nih.gov/29042450/
CAMK2G-C10orf55	rs2688608	1	10:75658349	G	T				https://www.nature.com/articles/ng.3359	intergenic region	-	-
PLAU	rs2227551	1	10:75669190	G	T	0.933834	0.905339		https://www.nature.com/articles/ng.3359	intron variant	immunity	https://jlb.onlinelibrary.wiley.com/doi/full/10.1189/jlb.0305158
PLAU	rs2227564	1	10:75673101	T	C		0.908265		https://www.nature.com/articles/nature11582	missense variant	immunity	https://jlb.onlinelibrary.wiley.com/doi/full/10.1189/jlb.0305158
ZMIZ1	rs1250546	2	10:81032532	G	A	0.88574	0.912409		https://www.nature.com/articles/nature11582	intron variant	microbiome and immunity	https://www.ncbi.nlm.nih.gov/pmc/articles/PMC4947143/; https://www.sciencedirect.com/science/article/pii/S0171933522000073
LINC01475	rs11190140	2	10:101291593	T	C		1.2	1.23	https://www.nature.com/articles/ng.175; https://www.nature.com/articles/ng.549	intergenic region	-	-
MFSD13A	rs3740415	1	10:104232716	G	A	0.945877		0.9354	https://www.nature.com/articles/ng.3359	intron variant	-	-
CD6	rs11230563	3	11:60776209	T	C	0.921659	0.918799	0.927682	https://www.nature.com/articles/ng.3359	missense variant	immunity	https://pubmed.ncbi.nlm.nih.gov/24265437/
FEN1	rs4246215	3	11:61564299	T	G	1.079	1.113		https://www.nature.com/articles/nature11582	intron variant	immunity	https://www.ncbi.nlm.nih.gov/pmc/articles/PMC8026080/
NXPE1	rs678170	5	11:114431956	A	G		1.09		https://www.nature.com/articles/ng.764	intron variant	-	-
LTBR	rs7954567	3	12:6491125	A	G		1.08575		https://www.nature.com/articles/ng.3359	intron variant	microbiome and immunity	https://pubmed.ncbi.nlm.nih.gov/28575727/; https://www.ncbi.nlm.nih.gov/pmc/articles/PMC2878123/;
LRRK2	rs4768236	2	12:40756472	C	A	1.08499	1.12388		https://www.nature.com/articles/ng.3359	intron variant	microbiome and immunity	https://www.science.org/doi/10.1126/scitranslmed.aas9292; https://www.ncbi.nlm.nih.gov/pmc/articles/PMC6580364/;https://www.nature.com/articles/s41531-021-00170-1
IFNG-AS1-IFNG	rs7134472	4	12:68499986	A	G	1.115		1.175	https://www.nature.com/articles/ng.3359	intergenic region	microbiome and immunity	https://www.ncbi.nlm.nih.gov/pmc/articles/PMC4960331/; https://www.ncbi.nlm.nih.gov/pmc/articles/PMC5625005/; https://www.frontiersin.org/articles/10.3389/fphys.2020.629141/full
SH2B3	rs3184504	1	12:111884608	T	C		1.062	1.047	https://www.nature.com/articles/ng.3528	missense variant	immunity	https://pubmed.ncbi.nlm.nih.gov/20560212/
ATXN2	rs653178	1	12:112007756	C	T	1.05801	1.06675		https://www.nature.com/articles/ng.3359	intron variant	-	-
MIR1178	rs11064881	1	12:120146925	A	G	1.10448		1.12735	https://www.nature.com/articles/ng.3359	intron variant	-	-
LINC00598	rs941823	4	13:41013977	T	C	0.933707		0.908265	https://www.nature.com/articles/nature11582	intron variant	-	-
LINC02341	rs9525625	2	13:43018030	T	C	1.04603	1.0764		https://www.nature.com/articles/ng.3359	intron variant	-	-
LINC02341	rs2062305	2	13:43052880	G	A		1.1		https://www.nature.com/articles/ng.717	intron variant	-	-
LACC1	rs3764147	1	13:44457925	G	A	1.109	1.155		https://www.nature.com/articles/nature11582	missense variant	microbiome and immunity	https://www.gastrojournal.org/article/S0016-5085(20)34953-2/fulltext
GPR18	rs3742130	3	13:99907341	A	G	0.91721	0.909727	0.926561	https://www.nature.com/articles/ng.3359	synonymous variant	immunity	https://rupress.org/jem/article/212/8/1203/41903/Identification-of-resolvin-D2-receptor-mediating
ZFP36L1-ACTN1	rs194749	3	14:69273905	C	T	1.075	1.088		https://www.nature.com/articles/nature11582	intergenic region	immunity	https://pubmed.ncbi.nlm.nih.gov/34643435/; https://journals.plos.org/plosone/article?id=10.1371/journal.pone.0109072
PRKCB	rs7404095	3	16:23864590	T	C	0.943396		0.935454	https://www.nature.com/articles/nature11582	intron variant	immunity	https://www.ncbi.nlm.nih.gov/pmc/articles/PMC7462346/
NOD2	rs17221417	4	16:50739582	G	C			1.29	https://www.nature.com/articles/nature05911	intron variant	microbiome and immunity	https://journals.plos.org/plospathogens/article?id=10.1371/journal.ppat.1006177
NOD2	rs2076756	4	16:50756881	G	A		1.53		https://www.nature.com/articles/ng.717	intron variant	microbiome and immunity	https://journals.plos.org/plospathogens/article?id=10.1371/journal.ppat.1006177
CDH3	rs6499188	4	16:68674788	G	A			0.877193	https://www.nature.com/articles/ng.764	intergenic region	-	-
IRF8-LINC01082	rs2361755	1	16:86009686	C	G	0.867	0.837		https://www.nature.com/articles/ng.3359	intergenic region	immunity	https://pubmed.ncbi.nlm.nih.gov/23468103/
IKZF3	rs12946510	2	17:37912377	T	C	1.157	1.154	1.163	https://www.nature.com/articles/nature11582	intergenic region	immunity	https://www.ncbi.nlm.nih.gov/pmc/articles/PMC9014263/
C17orf67	rs3853824	3	17:54880993	T	C	0.937976	0.921861		https://www.nature.com/articles/ng.3359	intron variant	-	-
SLC39A11	rs7210086	2	17:70641698	C	A		0.90009		https://www.nature.com/articles/nature11582	Downstream Variant	-	-
SLC39A11	rs17780256	2	17:70642923	C	A	0.919958			https://www.nature.com/articles/ng.3359	3 prime UTR variant	-	-
SMAD7	rs12953717	4	18:46453929	T	C				https://www.oncotarget.com/article/21697/text/	intron variant	microbiome and immunity	https://www.ncbi.nlm.nih.gov/pmc/articles/PMC4947143/; https://www.ncbi.nlm.nih.gov/pmc/articles/PMC3634534/; https://www.ncbi.nlm.nih.gov/pmc/articles/PMC8069188/; https://www.sciencedirect.com/science/article/pii/S0171933522000073
SMAD7	rs3736242	3	18:46474746	T	C				-	intron variant	microbiome and immunity	https://www.ncbi.nlm.nih.gov/pmc/articles/PMC4947143/; https://www.ncbi.nlm.nih.gov/pmc/articles/PMC3634534/; https://www.ncbi.nlm.nih.gov/pmc/articles/PMC8069188/; https://www.sciencedirect.com/science/article/pii/S0171933522000073
NFATC1	rs7236492	3	18:77220616	T	C	0.922877	0.905144		https://www.nature.com/articles/ng.3359	intron variant	microbiome and immunity	https://www.ncbi.nlm.nih.gov/pmc/articles/PMC2289909/; https://www.ncbi.nlm.nih.gov/pmc/articles/PMC3910266/; https://pubmed.ncbi.nlm.nih.gov/20081863/
SBNO2	rs2024092	1	19:1124031	A	G	1.11273	1.156		https://www.nature.com/articles/ng.3359; https://www.nature.com/articles/nature11582	intron variant	-	-
SBNO2	rs740495	3	19:1124835	G	A		1.16		https://www.nature.com/articles/ng.717	intron variant	-	-
SLC7A10-CEBPA	rs10500264	2	19:33750314	A	G	1.21			https://www.nature.com/articles/ng.489	intergenic region	microbiome and immunity	https://www.jci.org/articles/view/133605
NCOA5-CD40	rs6074022	2	20:44740196	C	T	1.07709	1.10111		https://www.nature.com/articles/ng.3359	intergenic region	microbiome and immunity	https://www.ncbi.nlm.nih.gov/pmc/articles/PMC4426483/ ; https://www.ncbi.nlm.nih.gov/pmc/articles/PMC148834/ ; https://www.ncbi.nlm.nih.gov/pmc/articles/PMC5347138/
LOC400867	rs2836754	5	21:40291740	T	C		1.15		https://www.nature.com/articles/ng2061	intron variant	-	-
NCF4-AS1	rs4821544	2	22:37258503	C	T		1.1		https://www.nature.com/articles/ng.3760	intron variant	microbiome and immunity	https://www.ncbi.nlm.nih.gov/pmc/articles/PMC2759653/; https://www.ncbi.nlm.nih.gov/pmc/articles/PMC7866830/
RPL3-SYNGR1	rs12627970	3	22:39721745	G	A	1.11552			https://www.nature.com/articles/ng.3359	intergenic region	immunity	https://www.ncbi.nlm.nih.gov/pmc/articles/PMC6562653/
Gene Name, gene associated with the SNV; RS ID, RS identification number; A1, allele 1 (allele reportetd as disease associated); A2, IBD, inflamatory bowel disease; CD, Crohn's disease; UC, ulcerative colitis ; OR, odds ratio
