# Supplementary material for: Ancient implications for today’s precision medicine: How the first Near East farmers shaped the European genetic risk architecture for IBD
Source: Research Square preprint supplement (doi:10.21203/rs.3.rs-2075746/v1), 2022-09-28
Supplement: Supplementary file 2 [file 366a4ad6276c6b3d1ec903ab.xlsx]

## Sheet: Tabelle1
Supplementary Table 2:Description of the study samples. This includes the groups into which the samples were placed based on archaeological context and dating (population group). Population groups with an asterisk (*) are listed as published data in the Allen Ancient DNA Resource (AADR; https://reich.hms.harvard.edu/allen-ancient-dna-resource-aadr-downloadable-genotypes-present-day-and-ancient-dn…
Population group	Master ID	Version ID	Geographical label	Publication	Date BP	Sex	Latitutde	Longitude
Early Farmers*	I5068	I5068	Austria_EN_LBK	MathiesonNature2018	7088	M	48.6632	16.5897
Early Farmers*	I5069	I5069	Austria_EN_LBK	MathiesonNature2018	6961	F	48.6632	16.5897
Early Farmers*	I5070	I5070	Austria_N_LBK	MathiesonNature2018	7048	M	48.5798	16.4693
Early Farmers*	I5204	I5204	Austria_N_LBK	MathiesonNature2018	6950	M	48.5798	16.4693
Early Farmers*	I5208	I5208	Austria_N_LBK	MathiesonNature2018	6950	F	48.5798	16.4693
Early Farmers*	I5205	I5205_published	Austria_N_LBK_published	MathiesonNature2018	6950	F	48.5798	16.4693
Early Farmers*	I5206	I5206_published	Austria_N_LBK_published	MathiesonNature2018	6950	F	48.5798	16.4693
Early Farmers*	I5207	I5207_published	Austria_N_LBK_published	MathiesonNature2018	6950	M	48.5798	16.4693
Early Farmers*	I0781	I0781	Bulgaria_C	MathiesonNature2018	6404	F	42.2322	24.2627
Early Farmers*	I0785	I0785	Bulgaria_C	MathiesonNature2018	6353	F	42.2322	24.2627
Early Farmers*	I2423	I2423	Bulgaria_C	MathiesonNature2018	6381	F	43.0578	26.9836
Early Farmers*	I2424	I2424	Bulgaria_C	MathiesonNature2018	6288	F	43.0578	26.9836
Early Farmers*	I2425	I2425	Bulgaria_C	MathiesonNature2018	6475	F	43.0589	26.7672
Early Farmers*	I2427	I2427	Bulgaria_C	MathiesonNature2018	6326	F	43.0589	26.7672
Early Farmers*	I2430	I2430	Bulgaria_C	MathiesonNature2018	6448	M	43.0578	26.9836
Early Farmers*	I2431	I2431	Bulgaria_C	MathiesonNature2018	6624	M	43.0992	26.7194
Early Farmers*	I2526	I2526	Bulgaria_C	MathiesonNature2018	7293	F	43.1395	25.6102
Early Farmers*	I2426	I2426_published	Bulgaria_C_published	MathiesonNature2018	6302	M	43.0589	26.7672
Early Farmers*	I0679	I0679_d	Bulgaria_Krepost_N	MathiesonNature2018	7617	F	42.02	25.6
Early Farmers*	I1113	I1113	Bulgaria_MalakPreslavets_N	MathiesonNature2018	7550	F	43.98	26.4
Early Farmers*	I1295	I1295	Bulgaria_MalakPreslavets_N	MathiesonNature2018	7550	M	43.98	26.4
Early Farmers*	I1297	I1297	Bulgaria_MalakPreslavets_N	MathiesonNature2018	7550	F	43.98	26.4
Early Farmers*	I1296	I1296_published	Bulgaria_MalakPreslavets_N_published	MathiesonNature2018	7550	M	43.98	26.4
Early Farmers*	I0706	I0706	Bulgaria_N	MathiesonNature2018	7899	M	43.1609	25.8834
Early Farmers*	I2521	I2521	Bulgaria_N	MathiesonNature2018	7503	M	43.1609	25.8834
Early Farmers*	I0704	I0704_published	Bulgaria_N_published	MathiesonNature2018	7892	F	43.1609	25.8834
Early Farmers*	I1298	I1298_published	Bulgaria_N_published	MathiesonNature2018	7883	F	43.3743	23.7293
Early Farmers*	I2529	I2529_published	Bulgaria_N_published	MathiesonNature2018	7610	M	42.1	25.75
Early Farmers*	ANI152	ANI152	Bulgaria_Varna_C	MathiesonNature2018	6462	M	43.2131	27.8644
Early Farmers*	ANI160	ANI160	Bulgaria_Varna_C	MathiesonNature2018	6533	M	43.2131	27.8644
Early Farmers*	merge_ANI159_ANI181	ANI159-ANI181	Bulgaria_Varna_C	MathiesonNature2018	6566	M	43.2131	27.8644
Early Farmers*	I10052	I10052	Croatia_C_Lasinja	NovakPLoSOne2021	6095	F	45.4482	17.6388
Early Farmers*	I10275	I10275	Croatia_C_Lasinja	NovakPLoSOne2021	6050	F	45.4482	17.6388
Early Farmers*	I10291	I10291	Croatia_C_Lasinja	NovakPLoSOne2021	6050	F	45.4482	17.6388
Early Farmers*	I10295	I10295	Croatia_C_Lasinja	NovakPLoSOne2021	6050	M	45.4482	17.6388
Early Farmers*	I10292	I10292	Croatia_C_Lasinja_lc	NovakPLoSOne2021	6050	M	45.4482	17.6388
Early Farmers*	I5071	I5071	Croatia_EN_Impressa	MathiesonNature2018	7582	F	43.3514	16.4618
Early Farmers*	I5072	I5072	Croatia_EN_Impressa	MathiesonNature2018	7545	M	43.3514	16.4618
Early Farmers*	I3498	I3498	Croatia_MN_Sopot	MathiesonNature2018	7681	M	45.3388	18.6989
Early Farmers*	I4168	I4168	Croatia_MN_Sopot	MathiesonNature2018	6588	F	45.3388	18.6989
Early Farmers*	I5077	I5077	Croatia_MN_Sopot	MathiesonNature2018	7001	M	45.551	18.7466
Early Farmers*	I5078	I5078	Croatia_MN_Sopot	MathiesonNature2018	6571	M	45.551	18.7466
Early Farmers*	I3433	I3433	Croatia_N_Cardial	MathiesonNature2018	7800	F	43.589	16.648
Early Farmers*	I3947	I3947	Croatia_N_Cardial	MathiesonNature2018	7834	M	43.589	16.648
Early Farmers*	I3948	I3948	Croatia_N_Cardial	MathiesonNature2018	7863	M	43.589	16.648
Early Farmers*	I4167	I4167	Croatia_N_Starcevo	MathiesonNature2018	6635	M	45.3388	18.6989
Early Farmers*	NER001	NER001	Czech_Bohemia_Jordanow_N	PapacScienceAdvances2021	6076	M	50.2681	14.5232
Early Farmers*	TUC007	TUC007	Czech_Bohemia_Jordanow_N	PapacScienceAdvances2021	6080	F	50.1377	14.2734
Early Farmers*	VLI004	VLI004	Czech_Bohemia_Jordanow_N	PapacScienceAdvances2021	6141	F	50.3659	14.4466
Early Farmers*	I7187	I7187	Czech_C_Baalberge	PapacScienceAdvances2021	6044	M	50.1458	14.2214
Early Farmers*	I7197	I7197	Czech_MN	OlaldeNature2018	6438	M	50.0504	14.3667
Early Farmers*	kol002	kol2BE.SG	Czech_MN.SG	SanchezQuintoPNAS2019	6494	F	50.0289	15.2012
Early Farmers*	kol006	kol6-ALL_DATA.SG	Czech_MN.SG	SanchezQuintoPNAS2019	6775	F	50.0289	15.2012
Early Farmers*	I4893	I4893	Czech_N	OlaldeNature2018	6345	M	50.1217	14.457
Early Farmers*	I4894	I4894	Czech_N	OlaldeNature2018	6371	F	50.1217	14.457
Early Farmers*	TU915(SX29)	TU915_SX29	France_Alsace_Lingolsheim_MN	FurtwanglerNatureCommunications2020	6600	M	48.5545	7.68175
Early Farmers*	TU916(SX30)	TU916_SX30	France_Alsace_Lingolsheim_MN	FurtwanglerNatureCommunications2020	6662	F	48.5545	7.68175
Early Farmers*	PEN003	PEN003	France_EN	RivollatScienceAdvance2020	7363	M	43.81	7.51
Early Farmers*	LBR001	LBR001	France_EN_MN	RivollatScienceAdvance2020	6740	M	43.7	6.99
Early Farmers*	LBR002	LBR002	France_EN_MN	RivollatScienceAdvance2020	6991	M	43.7	6.99
Early Farmers*	LBR003	LBR003	France_EN_MN	RivollatScienceAdvance2020	6680	F	43.7	6.99
Early Farmers*	LBR004	LBR004	France_EN_MN	RivollatScienceAdvance2020	6797	F	43.7	6.99
Early Farmers*	Schw432	Schw432.SG	France_GrandEst_EN.SG	BrunelPNAS2020	7031	F	48.7556	7.59958
Early Farmers*	Schw72-15	Schw72-15.SG	France_GrandEst_EN.SG	BrunelPNAS2020	7025	M	48.7556	7.59958
Early Farmers*	BERG157-2	BERG157-2.SG	France_GrandEst_MN.SG	BrunelPNAS2020	6050	F	43.2182	2.4127
Early Farmers*	BERG157-7	BERG157-7.SG	France_GrandEst_MN.SG	BrunelPNAS2020	6112	M	43.2182	2.4127
Early Farmers*	BUCH2	BUCH2.SG	France_GrandEst_MN.SG	BrunelPNAS2020	6250	M	48.2357	4.11263
Early Farmers*	ROS102	ROS102.SG	France_GrandEst_MN.SG	BrunelPNAS2020	6600	M	48.4967	7.47052
Early Farmers*	ROS45	ROS45.SG	France_GrandEst_MN.SG	BrunelPNAS2020	6644	M	48.4967	7.47052
Early Farmers*	ROS78	ROS78.SG	France_GrandEst_MN.SG	BrunelPNAS2020	6600	M	48.4967	7.47052
Early Farmers*	ROS82	ROS82.SG	France_GrandEst_MN.SG	BrunelPNAS2020	6619	F	48.4967	7.47052
Early Farmers*	MDV248	MDV248.SG	France_HautsDeFrance_EN.SG	BrunelPNAS2020	6963	M	49.419	4.00774
Early Farmers*	BLP10	BLP10.SG	France_HautsDeFrance_MN.SG	BrunelPNAS2020	6065	M	49.3925	3.73641
Early Farmers*	Es97-1	Es97-1.SG	France_HautsDeFrance_MN.SG	BrunelPNAS2020	6500	M	50.9178	1.7131
Early Farmers*	FLR001	FLR001	France_MN	RivollatScienceAdvance2020	6414	M	49.19	-0.38
Early Farmers*	FLR003	FLR003	France_MN	RivollatScienceAdvance2020	6376	M	49.19	-0.38
Early Farmers*	FLR004	FLR004	France_MN	RivollatScienceAdvance2020	6512	M	49.19	-0.38
Early Farmers*	FLR005	FLR005	France_MN	RivollatScienceAdvance2020	6301	M	49.19	-0.38
Early Farmers*	FLR007	FLR007	France_MN	RivollatScienceAdvance2020	6326	M	49.19	-0.38
Early Farmers*	FLR010	FLR010	France_MN	RivollatScienceAdvance2020	6345	M	49.19	-0.38
Early Farmers*	FLR013	FLR013	France_MN	RivollatScienceAdvance2020	6356	F	49.19	-0.38
Early Farmers*	FLR014	FLR014	France_MN	RivollatScienceAdvance2020	6426	M	49.19	-0.38
Early Farmers*	GRG003	GRG003	France_MN	RivollatScienceAdvance2020	6450	M	47.97	3.56
Early Farmers*	GRG008	GRG008	France_MN	RivollatScienceAdvance2020	6450	M	47.97	3.56
Early Farmers*	GRG015	GRG015	France_MN	RivollatScienceAdvance2020	6450	F	47.97	3.56
Early Farmers*	GRG016	GRG016	France_MN	RivollatScienceAdvance2020	6407	M	47.97	3.56
Early Farmers*	GRG018	GRG018	France_MN	RivollatScienceAdvance2020	6593	F	47.97	3.56
Early Farmers*	GRG019	GRG019	France_MN	RivollatScienceAdvance2020	6450	F	47.97	3.56
Early Farmers*	GRG021	GRG021	France_MN	RivollatScienceAdvance2020	6450	M	47.97	3.56
Early Farmers*	GRG022	GRG022	France_MN	RivollatScienceAdvance2020	6450	M	47.97	3.56
Early Farmers*	GRG023	GRG023	France_MN	RivollatScienceAdvance2020	6450	M	47.97	3.56
Early Farmers*	GRG025	GRG025	France_MN	RivollatScienceAdvance2020	6450	F	47.97	3.56
Early Farmers*	GRG027	GRG027	France_MN	RivollatScienceAdvance2020	6690	M	47.97	3.56
Early Farmers*	GRG028	GRG028	France_MN	RivollatScienceAdvance2020	6671	F	47.97	3.56
Early Farmers*	GRG032	GRG032	France_MN	RivollatScienceAdvance2020	6088	F	47.97	3.56
Early Farmers*	GRG035	GRG035	France_MN	RivollatScienceAdvance2020	6450	M	47.97	3.56
Early Farmers*	GRG041	GRG041	France_MN	RivollatScienceAdvance2020	6450	M	47.97	3.56
Early Farmers*	GRG043	GRG043	France_MN	RivollatScienceAdvance2020	6450	M	47.97	3.56
Early Farmers*	GRG047	GRG047	France_MN	RivollatScienceAdvance2020	6450	M	47.97	3.56
Early Farmers*	GRG049	GRG049	France_MN	RivollatScienceAdvance2020	6571	F	47.97	3.56
Early Farmers*	GRG050	GRG050	France_MN	RivollatScienceAdvance2020	6450	F	47.97	3.56
Early Farmers*	GRG052	GRG052	France_MN	RivollatScienceAdvance2020	6450	M	47.97	3.56
Early Farmers*	GRG056	GRG056	France_MN	RivollatScienceAdvance2020	6450	F	47.97	3.56
Early Farmers*	GRG057	GRG057	France_MN	RivollatScienceAdvance2020	6615	M	47.97	3.56
Early Farmers*	OBN002	OBN002	France_MN	RivollatScienceAdvance2020	6700	F	48.46	7.48
Early Farmers*	OBN004	OBN004	France_MN	RivollatScienceAdvance2020	6528	M	48.46	7.48
Early Farmers*	OBN005	OBN005	France_MN	RivollatScienceAdvance2020	6888	M	48.46	7.48
Early Farmers*	OBN006	OBN006	France_MN	RivollatScienceAdvance2020	7026	M	48.46	7.48
Early Farmers*	OBN007	OBN007	France_MN	RivollatScienceAdvance2020	6377	M	48.46	7.48
Early Farmers*	OBN008	OBN008	France_MN	RivollatScienceAdvance2020	6543	F	48.46	7.48
Early Farmers*	OBN009	OBN009	France_MN	RivollatScienceAdvance2020	6398	F	48.46	7.48
Early Farmers*	OBN010	OBN010	France_MN	RivollatScienceAdvance2020	6700	F	48.46	7.48
Early Farmers*	OBN011	OBN011	France_MN	RivollatScienceAdvance2020	6549	M	48.46	7.48
Early Farmers*	PRI001	PRI001	France_MN	RivollatScienceAdvance2020	6218	M	46.15	-0.48
Early Farmers*	PRI005	PRI005	France_MN	RivollatScienceAdvance2020	6150	F	46.15	-0.48
Early Farmers*	PRI006	PRI006	France_MN	RivollatScienceAdvance2020	6150	F	46.15	-0.48
Early Farmers*	I4303	I4303	France_MN_1	OlaldeNature2018	6624	M	43.457	5.863
Early Farmers*	I4304	I4304	France_MN_1	OlaldeNature2018	6637	M	43.457	5.863
Early Farmers*	I4305	I4305	France_MN_1	OlaldeNature2018	6680	F	43.457	5.863
Early Farmers*	CRE20D	CRE20D.SG	France_Occitanie_MN.SG	BrunelPNAS2020	6250	F	43.2051	3.1308
Early Farmers*	Pir4	Pir4.SG	France_Occitanie_MN.SG	BrunelPNAS2020	6293	F	43.2516	3.2202
Early Farmers*	HBS002	HBS002	Germany_EN_LBK	RivollatScienceAdvance2020	6975	M	51.9	11.05
Early Farmers*	HBS004	HBS004	Germany_EN_LBK	RivollatScienceAdvance2020	6975	M	51.9	11.05
Early Farmers*	HBS005	HBS005	Germany_EN_LBK	RivollatScienceAdvance2020	6975	M	51.9	11.05
Early Farmers*	HBS006	HBS006	Germany_EN_LBK	RivollatScienceAdvance2020	6975	U	51.9	11.05
Early Farmers*	HBS007	HBS007	Germany_EN_LBK	RivollatScienceAdvance2020	6975	M	51.9	11.05
Early Farmers*	HBS008	HBS008	Germany_EN_LBK	RivollatScienceAdvance2020	6975	M	51.9	11.05
Early Farmers*	HBS009	HBS009	Germany_EN_LBK	RivollatScienceAdvance2020	6975	M	51.9	11.05
Early Farmers*	I0022	I0022	Germany_EN_LBK	MathiesonNature2015 (1240k of same same sample with 390k in HaakLazaridis2015)	7125	F	48.78	9.18
Early Farmers*	I0025	I0025	Germany_EN_LBK	MathiesonNature2015 (1240k of same same sample with 390k in HaakLazaridis2015)	7125	F	48.78	9.18
Early Farmers*	I0026	I0026	Germany_EN_LBK	MathiesonNature2015 (1240k of same same sample with 390k in HaakLazaridis2015)	7125	F	48.78	9.18
Early Farmers*	I0054	I0054	Germany_EN_LBK	MathiesonNature2015 (1240k of same same sample with 390k in HaakLazaridis2015)	7074	F	51.66	11.53
Early Farmers*	I0100	I0100	Germany_EN_LBK	LipsonNature2017 (supplement of MathiesonNature2015, which itself was supplement of HaakLazaridis2015)	6944	F	51.8958	11.0467
Early Farmers*	I0795	I0795	Germany_EN_LBK	MathiesonNature2015 (1240k of same same sample with 390k in HaakLazaridis2015)	7071	M	51.2831	11.65
Early Farmers*	I0797	I0797	Germany_EN_LBK	MathiesonNature2015	7125	M	51.2831	11.65
Early Farmers*	I2014	I2014	Germany_EN_LBK	LipsonNature2017	6946	M	51.8958	11.0467
Early Farmers*	I2022	I2022	Germany_EN_LBK	LipsonNature2017	7125	F	51.8958	11.0467
Early Farmers*	SCH001	SCH001	Germany_EN_LBK	RivollatScienceAdvance2020	7050	F	49.39	8.57
Early Farmers*	SCH004	SCH004	Germany_EN_LBK	RivollatScienceAdvance2020	7050	M	49.39	8.57
Early Farmers*	SCH007	SCH007	Germany_EN_LBK	RivollatScienceAdvance2020	7050	F	49.39	8.57
Early Farmers*	SCH009	SCH009	Germany_EN_LBK	RivollatScienceAdvance2020	7050	F	49.39	8.57
Early Farmers*	SCH010	SCH010	Germany_EN_LBK	RivollatScienceAdvance2020	7050	F	49.39	8.57
Early Farmers*	SCH011	SCH011	Germany_EN_LBK	RivollatScienceAdvance2020	7050	M	49.39	8.57
Early Farmers*	SCH014	SCH014	Germany_EN_LBK	RivollatScienceAdvance2020	7050	F	49.39	8.57
Early Farmers*	SCH015	SCH015	Germany_EN_LBK	RivollatScienceAdvance2020	7050	F	49.39	8.57
Early Farmers*	SCH016	SCH016	Germany_EN_LBK	RivollatScienceAdvance2020	7091	M	49.39	8.57
Early Farmers*	SCH018	SCH018	Germany_EN_LBK	RivollatScienceAdvance2020	7045	M	49.39	8.57
Early Farmers*	SMH004	SMH004	Germany_EN_LBK	RivollatScienceAdvance2020	7116	F	48.78	9.18
Early Farmers*	XN164	XN164	Germany_EN_LBK	RivollatScienceAdvance2020	7110	M	48.78	9.18
Early Farmers*	XN165	XN165	Germany_EN_LBK	RivollatScienceAdvance2020	7099	M	48.78	9.18
Early Farmers*	XN166	XN166	Germany_EN_LBK	RivollatScienceAdvance2020	7100	F	48.78	9.18
Early Farmers*	XN167	XN167	Germany_EN_LBK	RivollatScienceAdvance2020	7176	M	48.78	9.18
Early Farmers*	XN168	XN168	Germany_EN_LBK	RivollatScienceAdvance2020	7093	M	48.78	9.18
Early Farmers*	XN169	XN169	Germany_EN_LBK	RivollatScienceAdvance2020	7081	F	48.78	9.18
Early Farmers*	XN170	XN170	Germany_EN_LBK	RivollatScienceAdvance2020	7024	M	48.78	9.18
Early Farmers*	XN171	XN171	Germany_EN_LBK	RivollatScienceAdvance2020	7106	M	48.78	9.18
Early Farmers*	XN172	XN172	Germany_EN_LBK	RivollatScienceAdvance2020	7101	F	48.78	9.18
Early Farmers*	XN173	XN173	Germany_EN_LBK	RivollatScienceAdvance2020	7060	M	48.78	9.18
Early Farmers*	XN174	XN174	Germany_EN_LBK	RivollatScienceAdvance2020	6800	M	48.78	9.18
Early Farmers*	XN175	XN175	Germany_EN_LBK	RivollatScienceAdvance2020	7092	F	48.78	9.18
Early Farmers*	XN178	XN178	Germany_EN_LBK	RivollatScienceAdvance2020	7100	F	48.78	9.18
Early Farmers*	XN180	XN180	Germany_EN_LBK	RivollatScienceAdvance2020	7068	M	48.78	9.18
Early Farmers*	XN182	XN182	Germany_EN_LBK	RivollatScienceAdvance2020	7069	F	48.78	9.18
Early Farmers*	XN183	XN183	Germany_EN_LBK	RivollatScienceAdvance2020	7152	F	48.78	9.18
Early Farmers*	XN188	XN188	Germany_EN_LBK	RivollatScienceAdvance2020	7130	F	48.78	9.18
Early Farmers*	XN191	XN191	Germany_EN_LBK	RivollatScienceAdvance2020	7199	M	48.78	9.18
Early Farmers*	XN205	XN205	Germany_EN_LBK	RivollatScienceAdvance2020	7100	F	48.78	9.18
Early Farmers*	XN206	XN206	Germany_EN_LBK	RivollatScienceAdvance2020	7086	M	48.78	9.18
Early Farmers*	XN207	XN207	Germany_EN_LBK	RivollatScienceAdvance2020	7100	F	48.78	9.18
Early Farmers*	XN211	XN211	Germany_EN_LBK	RivollatScienceAdvance2020	7068	F	48.78	9.18
Early Farmers*	XN215	XN215	Germany_EN_LBK	RivollatScienceAdvance2020	7010	M	48.78	9.18
Early Farmers*	XN224	XN224	Germany_EN_LBK	RivollatScienceAdvance2020	7091	F	48.78	9.18
Early Farmers*	XN225	XN225	Germany_EN_LBK	RivollatScienceAdvance2020	7100	M	48.78	9.18
Early Farmers*	I0046	I0046_published	Germany_EN_LBK_published	LipsonNature2017 (higher.cov.version.of.MathiesonNature2015)	7041	F	51.8958	11.0467
Early Farmers*	I0048	I0048_published	Germany_EN_LBK_published	LipsonNature2017 (supplement of MathiesonNature2015, which itself was supplement of HaakLazaridis2015)	7057	M	51.8958	11.0467
Early Farmers*	I0057	I0057_published	Germany_EN_LBK_published	LipsonNature2017 (higher.cov.version.of.MathiesonNature2015)	7070	F	51.8958	11.0467
Early Farmers*	I0659	I0659_published	Germany_EN_LBK_published	LipsonNature2017 (supplement of MathiesonNature2015, which itself was supplement of HaakLazaridis2015)	7031	M	51.8958	11.0467
Early Farmers*	I0821	I0821_published	Germany_EN_LBK_published	LipsonNature2017 (supplement of MathiesonNature2015, which itself was supplement of HaakLazaridis2015)	6938	M	51.8958	11.0467
Early Farmers*	I1550	I1550_published	Germany_EN_LBK_published	LipsonNature2017 (supplement of MathiesonNature2015, which itself was supplement of HaakLazaridis2015)	7125	F	51.8958	11.0467
Early Farmers*	I2008	I2008_published	Germany_EN_LBK_published	LipsonNature2017	7041	F	51.8958	11.0467
Early Farmers*	I2017	I2017_published	Germany_EN_LBK_published	LipsonNature2017	7125	F	51.8958	11.0467
Early Farmers*	I2021	I2021_published	Germany_EN_LBK_published	LipsonNature2017	7125	M	51.8958	11.0467
Early Farmers*	I2026	I2026_published	Germany_EN_LBK_published	LipsonNature2017	7125	M	51.8958	11.0467
Early Farmers*	I2029	I2029_published	Germany_EN_LBK_published	LipsonNature2017	7100	F	51.8958	11.0467
Early Farmers*	I2030	I2030_published	Germany_EN_LBK_published	LipsonNature2017	7125	F	51.8958	11.0467
Early Farmers*	I2032	I2032_published	Germany_EN_LBK_published	LipsonNature2017	7125	F	51.8958	11.0467
Early Farmers*	I2036	I2036_published	Germany_EN_LBK_published	LipsonNature2017	7125	F	51.8958	11.0467
Early Farmers*	I2037	I2037_published	Germany_EN_LBK_published	LipsonNature2017	7050	M	51.8958	11.0467
Early Farmers*	I2038	I2038_published	Germany_EN_LBK_published	LipsonNature2017	7125	F	51.8958	11.0467
Early Farmers*	I0018	Stuttgart_published.DG	Germany_EN_LBK_Stuttgart_published.DG	LazaridisNature2014	7168	F	48.78	9.18
Early Farmers*	Klei10	Klei10.SG	Greece_LN_2.SG	HofmanovaPNAS2016	6348	M	40.4317	21.8588
Early Farmers*	Pal7	Pal7.SG	Greece_LN_2.SG	HofmanovaPNAS2016	6348	F	39.7517	22.0096
Early Farmers*	I5427	I5427	Greece_N	MathiesonNature2018	7883	F	36.6383	22.3825
Early Farmers*	Rev5	Rev5.SG	Greece_N.SG	HofmanovaPNAS2016	8316	F	39.4886	20.9177
Early Farmers*	I3708	I3708	Greece_Peloponnese_N	MathiesonNature2018	6500	F	36.6383	22.3825
Early Farmers*	I2937	I2937_all	Greece_Peloponnese_N_all	LazaridisNature2017	7360	F	36.6383	22.3825
Early Farmers*	I1908	I1908	Hungary_C_Balaton_Lasinja	LipsonNature2017	6050	F	46.7099	17.2394
Early Farmers*	I1909	I1909	Hungary_C_Balaton_Lasinja	LipsonNature2017	6086	F	45.993	18.5813
Early Farmers*	I2394	I2394	Hungary_C_Balaton_Lasinja	LipsonNature2017	6231	M	47.1026	17.913
Early Farmers*	I4189	I4189	Hungary_C_Balaton_Lasinja	LipsonNature2017	6050	F	46.2045	18.7299
Early Farmers*	I1907	I1907_published	Hungary_C_Balaton_Lasinja_published	LipsonNature2017	6183	F	47.6387	17.3645
Early Farmers*	I2353	I2353	Hungary_EarlyC_Tiszapolgar	LipsonNature2017	6200	M	47.4592	20.5128
Early Farmers*	I2354	I2354	Hungary_EarlyC_Tiszapolgar	LipsonNature2017	6200	M	47.4592	20.5128
Early Farmers*	I2395	I2395	Hungary_EarlyC_Tiszapolgar	LipsonNature2017	6200	M	47.4592	20.5128
Early Farmers*	I2793	I2793_published	Hungary_EarlyC_Tiszapolgar_Bodrogkeresztur_published	LipsonNature2017	6273	M	47.1916	20.4023
Early Farmers*	I2794	I2794	Hungary_EN_Koros	LipsonNature2017	7564	F	47.1916	20.4023
Early Farmers*	I0174	I0174	Hungary_EN_Starcevo_1	MathiesonNature2015 (1240k of same same sample with 390k in HaakLazaridis2015)	7558	M	46.2086	18.7
Early Farmers*	I1876	I1876	Hungary_EN_Starcevo_1	LipsonNature2017	7541	M	46.2086	18.7
Early Farmers*	I1878	I1878_published	Hungary_EN_Starcevo_1_published	LipsonNature2017	7687	M	46.2086	18.7
Early Farmers*	I1880	I1880	Hungary_EN_Starcevo_2	LipsonNature2017	7600	M	45.993	18.5813
Early Farmers*	I1877	I1877_all	Hungary_EN_Starcevo_2_all	LipsonNature2017	7567	M	46.2086	18.7
Early Farmers*	I2783	I2783	Hungary_Hunyadihalom_MCHA	LipsonNature2017	6010	M	46.3348	19.0539
Early Farmers*	I1495	I1495	Hungary_LN_Lengyel	MathiesonNature2015 (capture of same sample shotgunned in Gamba2014)	6367	M	47.167	19.833
Early Farmers*	I1899	I1899	Hungary_LN_Lengyel	LipsonNature2017	6550	M	47.1026	17.913
Early Farmers*	I1900	I1900	Hungary_LN_Lengyel	LipsonNature2017	6686	M	47.1026	17.913
Early Farmers*	I1901	I1901	Hungary_LN_Lengyel	LipsonNature2017	6550	M	47.1026	17.913
Early Farmers*	I1906	I1906	Hungary_LN_Lengyel	LipsonNature2017	6550	M	47.5106	18.6169
Early Farmers*	I2352	I2352	Hungary_LN_Lengyel	LipsonNature2017	6550	M	47.1026	17.913
Early Farmers*	I1902	I1902_published	Hungary_LN_Lengyel_published	LipsonNature2017	6550	M	47.0194	17.9624
Early Farmers*	I1905	I1905_published	Hungary_LN_Lengyel_published	LipsonNature2017	6664	M	47.5106	18.6169
Early Farmers*	I1890	I1890	Hungary_LN_Sopot	LipsonNature2017	6875	M	46.4159	18.9197
Early Farmers*	I1891	I1891	Hungary_LN_Sopot	LipsonNature2017	6913	F	46.4159	18.9197
Early Farmers*	I1893	I1893	Hungary_LN_Sopot	LipsonNature2017	6895	M	46.2045	18.7299
Early Farmers*	I4184	I4184	Hungary_LN_Sopot	LipsonNature2017	6754	F	46.0254	18.3251
Early Farmers*	I4185	I4185	Hungary_LN_Sopot	LipsonNature2017	6873	M	46.2045	18.7299
Early Farmers*	I4183	I4183	Hungary_LN_Sopot_lc	LipsonNature2017	6743	M	46.0254	18.3251
Early Farmers*	I0449	I0449	Hungary_LN_Tisza	LipsonNature2017	6700	M	46.3559	20.2782
Early Farmers*	I2358	I2358	Hungary_LN_Tisza	LipsonNature2017	6700	F	47.4592	20.5128
Early Farmers*	I2387	I2387	Hungary_LN_Tisza	LipsonNature2017	6700	M	46.3941	20.245
Early Farmers*	I2746	I2746	Hungary_LN_Tisza	LipsonNature2017	6700	M	46.9396	21.2091
Early Farmers*	I0447	I0447_published	Hungary_LN_Tisza_published	LipsonNature2017	6700	F	46.3559	20.2782
Early Farmers*	I7042	I7042	Hungary_MN	OlaldeNature2018	6086	M	47.43	19.052
Early Farmers*	I2355	I2355	Hungary_MN_ALBK_Szakalhat	LipsonNature2017	7050	F	47.4592	20.5128
Early Farmers*	I2357	I2357	Hungary_MN_ALBK_Szakalhat_all	LipsonNature2017	7050	F	47.4592	20.5128
Early Farmers*	I1498	I1498	Hungary_MN_ALPc	MathiesonNature2015 (capture of same sample shotgunned in Gamba2014)	7094	F	47.5247	21.5856
Early Farmers*	I1500	I1500	Hungary_MN_ALPc	MathiesonNature2015 (capture of same sample shotgunned in Gamba2014)	7058	M	47.167	20.833
Early Farmers*	I1505	I1505	Hungary_MN_ALPc	MathiesonNature2015 (capture of same sample shotgunned in Gamba2014)	7057	F	47.88	21.19
Early Farmers*	I3535	I3535	Hungary_MN_ALPc	LipsonNature2017	7068	M	47.8576	21.4324
Early Farmers*	I4188	I4188_published	Hungary_MN_ALPc	LipsonNature2017	7050	M	47.8651	21.1253
Early Farmers*	I1499	I1499	Hungary_MN_ALPc_Bukk	MathiesonNature2015 (capture of same sample shotgunned in Gamba2014)	7077	F	48.52	21.168
Early Farmers*	I4186	I4186	Hungary_MN_ALPc_Esztar	LipsonNature2017	7050	F	47.4776	21.503
Early Farmers*	I4187	I4187	Hungary_MN_ALPc_Esztar	LipsonNature2017	7050	M	47.4804	21.5019
Early Farmers*	I2384	I2384_published	Hungary_MN_ALPc_published	LipsonNature2017	7114	M	47.8576	21.4324
Early Farmers*	I2743	I2743	Hungary_MN_ALPc_Szakalhat	LipsonNature2017	7050	M	47.1788	19.8605
Early Farmers*	I2744	I2744	Hungary_MN_ALPc_Szakalhat	LipsonNature2017	7050	M	47.1788	19.8605
Early Farmers*	I2745	I2745	Hungary_MN_ALPc_Szakalhat	LipsonNature2017	7050	F	47.1788	19.8605
Early Farmers*	I2380	I2380	Hungary_MN_ALPc_Szatmar	LipsonNature2017	7350	F	47.7813	20.5826
Early Farmers*	I2382	I2382	Hungary_MN_ALPc_Szatmar	LipsonNature2017	7350	M	47.7813	20.5826
Early Farmers*	I2375	I2375	Hungary_MN_ALPc_Tiszadob	LipsonNature2017	7050	M	48.0036	21.1765
Early Farmers*	I2376	I2376	Hungary_MN_ALPc_Tiszadob	LipsonNature2017	7050	M	48.0036	21.1765
Early Farmers*	I2377	I2377	Hungary_MN_ALPc_Tiszadob	LipsonNature2017	7001	M	48.0036	21.1765
Early Farmers*	I2378	I2378	Hungary_MN_ALPc_Tiszadob	LipsonNature2017	7050	M	47.8607	21.0006
Early Farmers*	I2379	I2379	Hungary_MN_ALPc_Tiszadob	LipsonNature2017	6984	M	47.8607	21.0006
Early Farmers*	I4199	I4199	Hungary_MN_ALPc_Tiszadob	LipsonNature2017	7050	F	48.0036	21.1765
Early Farmers*	I0176	I0176	Hungary_MN_LBK	MathiesonNature2015 (1240k of same same sample with 390k in HaakLazaridis2015)	7002	F	46.4	18.74
Early Farmers*	I1496	I1496	Hungary_MN_LBK	MathiesonNature2015 (capture of same sample shotgunned in Gamba2014)	7040	M	47.167	19.833
Early Farmers*	I1882	I1882	Hungary_MN_LBK	LipsonNature2017	7050	M	47.5016	18.9105
Early Farmers*	I1904	I1904	Hungary_MN_LBK	LipsonNature2017	7010	M	46.2049	18.7004
Early Farmers*	I3536	I3536	Hungary_MN_LBK	LipsonNature2017	7050	F	47.6387	17.3645
Early Farmers*	I4196	I4196	Hungary_MN_LBK	LipsonNature2017	7050	F	47.5016	18.9105
Early Farmers*	I4181	I4181	Hungary_MN_LBK_lc	LipsonNature2017	7050	F	46.7361	18.9581
Early Farmers*	I2739	I2739_published	Hungary_MN_LBK_published	LipsonNature2017	7158	M	46.2086	18.7
Early Farmers*	I1506	I1506	Hungary_MN_LBK.SG	GambaNatureCommunications2014	7146	F	47.88	21.19
Early Farmers*	I1887	I1887	Hungary_MN_Vinca	LipsonNature2017	7150	M	45.5853	18.3077
Early Farmers*	I1894	I1894	Hungary_MN_Vinca	LipsonNature2017	7150	F	45.5853	18.3077
Early Farmers*	I1896	I1896	Hungary_MN_Vinca	LipsonNature2017	7190	M	45.5969	18.2825
Early Farmers*	I1895	I1895_published	Hungary_MN_Vinca_published	LipsonNature2017	7195	F	45.5969	18.2825
Early Farmers*	R1014	R1014.SG	Italy_C.SG	AntonioGaoMootsScience2019	7074	M	41.367	13.2914
Early Farmers*	R10	R10.SG	Italy_N.SG	AntonioGaoMootsScience2019	7628	F	41.96	13.54
Early Farmers*	R16	R16.SG	Italy_N.SG	AntonioGaoMootsScience2019	7202	F	43.7224	13.0339
Early Farmers*	R17	R17.SG	Italy_N.SG	AntonioGaoMootsScience2019	7216	M	43.7224	13.0339
Early Farmers*	R18	R18.SG	Italy_N.SG	AntonioGaoMootsScience2019	7271	F	43.7224	13.0339
Early Farmers*	R2	R2.SG	Italy_N.SG	AntonioGaoMootsScience2019	7981	F	41.96	13.54
Early Farmers*	R3	R3.SG	Italy_N.SG	AntonioGaoMootsScience2019	7716	F	41.96	13.54
Early Farmers*	R8	R8.SG	Italy_N.SG	AntonioGaoMootsScience2019	7708	F	41.96	13.54
Early Farmers*	R9	R9.SG	Italy_N.SG	AntonioGaoMootsScience2019	7481	M	41.96	13.54
Early Farmers*	LON003_LON004	LON003	Italy_Sardinia_N	MarcusNatureCommunications2020	6274	M	39.87	9.2356
Early Farmers*	NOE001	NOE001	Italy_Sardinia_N	MarcusNatureCommunications2020	6090	M	40.6661	8.59315
Early Farmers*	NOE002	NOE002	Italy_Sardinia_N	MarcusNatureCommunications2020	6132	M	40.6661	8.59315
Early Farmers*	SID005	SID005	Italy_Sardinia_N	MarcusNatureCommunications2020	6095	M	40.624	8.63669
Early Farmers*	I4062	I4062	Italy_Sicily_MN	FernandesNatureEcologyEvolution2020	6815	F	37.724	12.916
Early Farmers*	I4063	I4063	Italy_Sicily_MN	FernandesNatureEcologyEvolution2020	6832	F	37.724	12.916
Early Farmers*	I4064	I4064	Italy_Sicily_MN	FernandesNatureEcologyEvolution2020	6718	M	37.724	12.916
Early Farmers*	I4065	I4065	Italy_Sicily_MN	FernandesNatureEcologyEvolution2020	6815	F	37.724	12.916
Early Farmers*	N25	N25.SG	Poland_BKG.SG	FernandesScientificReports2018	6250	F	52.61	18.8
Early Farmers*	N26	N26.SG	Poland_BKG.SG	FernandesScientificReports2018	6177	M	50.67	21.38
Early Farmers*	N27	N27.SG	Poland_BKG.SG	FernandesScientificReports2018	6250	M	52.61	18.8
Early Farmers*	N28	N28.SG	Poland_BKG.SG	FernandesScientificReports2018	6074	M	52.61	18.8
Early Farmers*	N31	N31.SG	Poland_BKG.SG	FernandesScientificReports2018	6130	F	52.61	18.8
Early Farmers*	N36	N36.SG	Poland_BKG.SG	FernandesScientificReports2018	6250	F	50.67	21.38
Early Farmers*	I4088	I4088	Romania_C_Bodrogkeresztur	MathiesonNature2018	6191	F	47.7467	22.395
Early Farmers*	I2532	I2532	Romania_EN	MathiesonNature2018	7614	M	45.466	27.01
Early Farmers*	I2533	I2533	Romania_EN	MathiesonNature2018	7371	F	44.2667	23.9
Early Farmers*	I0633	I0633	Serbia_EN	MathiesonNature2018	7424	M	44.9	19.75
Early Farmers*	I0634	I0634	Serbia_EN	MathiesonNature2018	6560	M	44.9	19.75
Early Farmers*	I1131	I1131	Serbia_EN	MathiesonNature2018	6482	M	44.9	19.75
Early Farmers*	I4918	I4918	Serbia_EN_Starcevo	MathiesonNature2018	7600	F	44.4864	21.0761
Early Farmers*	I4665	I4665_published	Serbia_IronGates_N	MathiesonNature2018	8006	F	44.5529	22.0276
Early Farmers*	I5405	I5405	Serbia_IronGates_N	MathiesonNature2018	7684	F	44.5529	22.0276
Early Farmers*	I4666	I4666_published	Serbia_IronGates_N_published	MathiesonNature2018	8017	M	44.5529	22.0276
Early Farmers*	CHA002	CHA002_merged	Spain_EN	VillalbaMoucoCurrentBiology2019	7127	M	42.2151	-0.138457
Early Farmers*	CHA003	CHA003_merged	Spain_EN	VillalbaMoucoCurrentBiology2019	7075	M	42.2151	-0.138457
Early Farmers*	CHA004	CHA004.A0102	Spain_EN	VillalbaMoucoCurrentBiology2019	6420	F	42.2151	-0.138457
Early Farmers*	FUC003	FUC003_merged	Spain_EN	VillalbaMoucoCurrentBiology2019	7019	M	42.3856	-3.73489
Early Farmers*	I0409	I0409	Spain_EN	MathiesonNature2015 (1240k of same same sample with 390k in HaakLazaridis2015)	7210	F	42.5	0.5
Early Farmers*	I0410	I0410	Spain_EN	MathiesonNature2015 (1240k of same same sample with 390k in HaakLazaridis2015)	7106	M	42.5	0.5
Early Farmers*	I0412	I0412	Spain_EN	MathiesonNature2015 (1240k of same same sample with 390k in HaakLazaridis2015)	7177	M	42.5	0.5
Early Farmers*	I0413	I0413	Spain_EN	MathiesonNature2015 (1240k of same same sample with 390k in HaakLazaridis2015)	7143	F	42.5	0.5
Early Farmers*	I1972	I1972	Spain_EN	LipsonNature2017	6703	F	42.6282	-3.11649
Early Farmers*	I2199	I2199	Spain_EN	LipsonNature2017	7069	F	42.6282	-3.11649
Early Farmers*	atp005	atp005.SG	Spain_EN.SG	ValdioseraPNAS2018	7069	M	42.3527	-3.51832
Early Farmers*	mur	mur.SG	Spain_EN.SG	ValdioseraPNAS2018	7127	M	37.5422	-4.30388
Early Farmers*	I7550	I7550	Spain_MLN	OlaldeScience2019	6100	F	36.445	-6.21
Early Farmers*	I8134	I8134	Spain_MLN	OlaldeScience2019	6100	F	36.445	-6.21
Early Farmers*	TU875(SX9)	TU875_SX9	Switzerland_LN	FurtwanglerNatureCommunications2020	6338	F	47.0117	7.25054
Early Farmers*	TU877(SX11)	TU877_SX11	Switzerland_LN	FurtwanglerNatureCommunications2020	6355	F	47.0117	7.25054
Early Farmers	KH170249_KH180588	KH170249_KH180588	Fellbach-Oeffingen	ThisPublication	7000	..	..	..
Early Farmers	KH170254_KH180592	KH170254_KH180592	Fellbach-Oeffingen	ThisPublication	7000	..	..	..
Early Farmers	KH170260_KH180585_KH180594	KH170260_KH180585_KH180594	Fellbach-Oeffingen	ThisPublication	7000	F	..	..
Early Farmers	KH170262_KH180591	KH170262_KH180591	Fellbach-Oeffingen	ThisPublication	7000	..	..	..
Early Farmers	KH170264_KH180595	KH170264_KH180595	Fellbach-Oeffingen	ThisPublication	7000	..	..	..
Early Farmers	KH170284_KH180597	KH170284_KH180597	Fellbach-Oeffingen	ThisPublication	7000	..	..	..
Early Farmers	KH180583	KH180583	Fellbach-Oeffingen	ThisPublication	7000	..	..	..
Early Farmers	KH180584	KH180584	Fellbach-Oeffingen	ThisPublication	7000	..	..	..
Early Farmers	KH180586	KH180586	Fellbach-Oeffingen	ThisPublication	7000	..	..	..
Early Farmers	KH180587_KH180589	KH180587_KH180589	Fellbach-Oeffingen	ThisPublication	7000	..	..	..
Early Farmers	KH180590	KH180590	Fellbach-Oeffingen	ThisPublication	7000	..	..	..
Early Farmers	KH180596	KH170302_KH180596	Fellbach-Oeffingen	ThisPublication	7000	..	..	..
Early Farmers	KH180598	KH180598	Fellbach-Oeffingen	ThisPublication	7000	..	..	..
Early Farmers	KH180599	KH170305_KH180599	Fellbach-Oeffingen	ThisPublication	7000	..	..	..
Early Farmers	KH180600	KH180600	Fellbach-Oeffingen	ThisPublication	7000	..	..	..
Early Farmers	KH180601	KH180601	Fellbach-Oeffingen	ThisPublication	7000	..	..	..
Early Farmers	KH180602	KH180602	Fellbach-Oeffingen	ThisPublication	7000	..	..	..
Early Farmers	KH180164_KH180558	KH180164_KH180558	Niederpoering	ThisPublication	7000	F	..	..
Early Farmers	KH180166_KH180562	KH180166_KH180562	Niederpoering	ThisPublication	7000	..	..	..
Early Farmers	KH180167_KH180566	KH180167_KH180566	Niederpoering	ThisPublication	7000	M	..	..
Early Farmers	KH180168_KH180563	KH180168_KH180563	Niederpoering	ThisPublication	7000	F	..	..
Early Farmers	KH180169_KH180561	KH180169_KH180561	Niederpoering	ThisPublication	7000	M	..	..
Early Farmers	KH180170_KH180565	KH180170_KH180565	Niederpoering	ThisPublication	7000	..	..	..
Early Farmers	KH180172_KH180560	KH180172_KH180560	Niederpoering	ThisPublication	7000	M	..	..
Early Farmers	KH160040_KH181902	KH160040_KH181902	Trebur	ThisPublication	7000	F	..	..
Early Farmers	KH160041_KH181867	KH160041_KH181867	Trebur	ThisPublication	7000	M	..	..
Early Farmers	KH160042	KH160042	Trebur	ThisPublication	7000	F	..	..
Early Farmers	KH160043	KH160043	Trebur	ThisPublication	7000	M	..	..
Early Farmers	KH160044_KH181915	KH160044_KH181915	Trebur	ThisPublication	7000	M	..	..
Early Farmers	KH160046_KH181488	KH160046_KH181488	Trebur	ThisPublication	7000	M	..	..
Early Farmers	KH160047_KH181467	KH160047_KH181467	Trebur	ThisPublication	7000	M	..	..
Early Farmers	KH160048_KH160216	KH160048_KH160216	Trebur	ThisPublication	7000	M	..	..
Early Farmers	KH160049_KH181904	KH160049_KH181904	Trebur	ThisPublication	7000	M	..	..
Early Farmers	KH160050_KH181863	KH160050_KH181863	Trebur	ThisPublication	7000	M	..	..
Early Farmers	KH160051_KH181888_KH181917	KH160051_KH181888_KH181917	Trebur	ThisPublication	7000	F	..	..
Early Farmers	KH160052	KH160052	Trebur	ThisPublication	7000	F	..	..
Early Farmers	KH160053_KH181887_KH181889	KH160053_KH181887_KH181889	Trebur	ThisPublication	7000	M	..	..
Early Farmers	KH160054	KH160054	Trebur	ThisPublication	7000	M	..	..
Early Farmers	KH160055	KH160055	Trebur	ThisPublication	7000	F	..	..
Early Farmers	KH160056_KH181479	KH160056_KH181479	Trebur	ThisPublication	7000	F	..	..
Early Farmers	KH160057_KH181472_KH181473	KH160057_KH181472_KH181473	Trebur	ThisPublication	7000	F	..	..
Early Farmers	KH160058_KH181470	KH160058_KH181470	Trebur	ThisPublication	7000	F	..	..
Early Farmers	KH160059	KH160059	Trebur	ThisPublication	7000	M	..	..
Early Farmers	KH160060_KH181445	KH160060_KH181445	Trebur	ThisPublication	7000	F	..	..
Early Farmers	KH160061_KH181448	KH160061_KH181448	Trebur	ThisPublication	7000	M	..	..
Early Farmers	KH160062_KH181458	KH160062_KH181458	Trebur	ThisPublication	7000	M	..	..
Early Farmers	KH160063	KH160063	Trebur	ThisPublication	7000	F	..	..
Bronze Age/Iron Age*	Bul6	Bul6	Bulgaria_BeliBreyag_EBA	MathiesonNature2018	4450	M	42.4296	25.8984
Bronze Age/Iron Age*	Bul8	Bul8	Bulgaria_BeliBreyag_EBA	MathiesonNature2018	4450	M	42.4296	25.8984
Bronze Age/Iron Age*	I12835	Bul10	Bulgaria_EBA_Ezero	MathiesonNature2018	4951	F	42.4296	25.8984
Bronze Age/Iron Age*	I3499	I3499	Croatia_LateC_EBA_Vucedol	MathiesonNature2018	4718	M	45.3388	18.6989
Bronze Age/Iron Age*	I4175	I4175	Croatia_LateC_EBA_Vucedol	MathiesonNature2018	4800	F	45.3356	19.0605
Bronze Age/Iron Age*	I2792	I2792	Croatia_Vucedol	MathiesonNature2018	4676	M	45.3356	19.0605
Bronze Age/Iron Age*	I4136	RISE567.SG	Czech_BellBeaker	OlaldeNature2018 (known there as I5025)	4250	F	50.118	14.258
Bronze Age/Iron Age*	I4885	I4885	Czech_BellBeaker	OlaldeNature2018	4170	M	50.1217	14.457
Bronze Age/Iron Age*	I4886	I4886	Czech_BellBeaker	OlaldeNature2018	4088	M	50.1217	14.457
Bronze Age/Iron Age*	I4888	I4888	Czech_BellBeaker	OlaldeNature2018	4038	M	50.1217	14.457
Bronze Age/Iron Age*	I4889	I4889	Czech_BellBeaker	OlaldeNature2018	4131	M	50.1217	14.457
Bronze Age/Iron Age*	I4890	I4890	Czech_BellBeaker	OlaldeNature2018	4250	M	50.1217	14.457
Bronze Age/Iron Age*	I4891	I4891	Czech_BellBeaker	OlaldeNature2018	4131	M	50.1217	14.457
Bronze Age/Iron Age*	I4895	I4895	Czech_BellBeaker	OlaldeNature2018	4106	M	50.0504	14.3667
Bronze Age/Iron Age*	I4896	I4896	Czech_BellBeaker	OlaldeNature2018	4163	F	50.0504	14.3667
Bronze Age/Iron Age*	I4945	I4945	Czech_BellBeaker	OlaldeNature2018	4177	F	50.1217	14.457
Bronze Age/Iron Age*	I4946	I4946	Czech_BellBeaker	OlaldeNature2018	4188	F	50.0504	14.3667
Bronze Age/Iron Age*	I5514	I5514	Czech_BellBeaker	OlaldeNature2018	4155	M	50.0504	14.3667
Bronze Age/Iron Age*	I5666	I5666	Czech_BellBeaker	OlaldeNature2018	4250	M	50.274	15.8139
Bronze Age/Iron Age*	I6468	I6468	Czech_BellBeaker	OlaldeNature2018	4150	F	50.1667	14.3167
Bronze Age/Iron Age*	I6476	I6476	Czech_BellBeaker	OlaldeNature2018	4100	F	50.5095	14.0445
Bronze Age/Iron Age*	I6480	I6480	Czech_BellBeaker	OlaldeNature2018	4150	M	50.1667	14.3167
Bronze Age/Iron Age*	I7205	I7205	Czech_BellBeaker	OlaldeNature2018	4200	M	50.4103	14.0746
Bronze Age/Iron Age*	I7211	I7211	Czech_BellBeaker	OlaldeNature2018	4183	F	50.4103	14.0746
Bronze Age/Iron Age*	I7212	I7212	Czech_BellBeaker	OlaldeNature2018	4247	M	50.4103	14.0746
Bronze Age/Iron Age*	I7213	I7213	Czech_BellBeaker	OlaldeNature2018	4231	F	50.4103	14.0746
Bronze Age/Iron Age*	I7214	I7214	Czech_BellBeaker	OlaldeNature2018	4200	F	50.4103	14.0746
Bronze Age/Iron Age*	I7249	I7249	Czech_BellBeaker	OlaldeNature2018	4011	M	50.19	14.158
Bronze Age/Iron Age*	I7250	I7250	Czech_BellBeaker	OlaldeNature2018	4200	F	50.19	14.158
Bronze Age/Iron Age*	I7251	I7251	Czech_BellBeaker	OlaldeNature2018	4200	M	50.19	14.158
Bronze Age/Iron Age*	I7269	I7269	Czech_BellBeaker	OlaldeNature2018	4200	M	50.19	14.158
Bronze Age/Iron Age*	I7270	I7270	Czech_BellBeaker	OlaldeNature2018	4200	F	50.19	14.158
Bronze Age/Iron Age*	I7275	I7275	Czech_BellBeaker	OlaldeNature2018	4200	M	50.19	14.158
Bronze Age/Iron Age*	I7276	I7276	Czech_BellBeaker	OlaldeNature2018	4200	M	50.19	14.158
Bronze Age/Iron Age*	I7278	I7278	Czech_BellBeaker	OlaldeNature2018	4333	M	50.19	14.158
Bronze Age/Iron Age*	I7281	I7281	Czech_BellBeaker	OlaldeNature2018	4194	F	50.045	14.3393
Bronze Age/Iron Age*	I7282	I7282	Czech_BellBeaker	OlaldeNature2018	4200	M	50.4103	14.0746
Bronze Age/Iron Age*	I7286	I7286	Czech_BellBeaker	OlaldeNature2018	4221	M	50.4103	14.0746
Bronze Age/Iron Age*	I7287	I7287	Czech_BellBeaker	OlaldeNature2018	4200	M	50.4103	14.0746
Bronze Age/Iron Age*	I7288	I7288	Czech_BellBeaker	OlaldeNature2018	4200	M	50.4103	14.0746
Bronze Age/Iron Age*	I7290	I7290	Czech_BellBeaker	OlaldeNature2018	4200	F	50.4103	14.0746
Bronze Age/Iron Age*	I4145	RISE566.SG	Czech_BellBeaker_dup.I4145.SG	AllentoftNature2015	4089	M	50.118	14.258
Bronze Age/Iron Age*	HOP001	HOP001	Czech_Bohemia_BellBeaker	PapacScienceAdvances2021	4240	M	50.0804	14.2769
Bronze Age/Iron Age*	HOP002	HOP002	Czech_Bohemia_BellBeaker	PapacScienceAdvances2021	4177	F	50.0804	14.2769
Bronze Age/Iron Age*	HOP003	HOP003	Czech_Bohemia_BellBeaker	PapacScienceAdvances2021	4250	M	50.0804	14.2769
Bronze Age/Iron Age*	KO1003	KO1003	Czech_Bohemia_BellBeaker	PapacScienceAdvances2021	4160	M	50.0256	15.1692
Bronze Age/Iron Age*	KO1004	KO1004	Czech_Bohemia_BellBeaker	PapacScienceAdvances2021	4166	M	50.0256	15.1692
Bronze Age/Iron Age*	KO1005	KO1005	Czech_Bohemia_BellBeaker	PapacScienceAdvances2021	4331	F	50.0256	15.1692
Bronze Age/Iron Age*	KOP002	KOP002	Czech_Bohemia_BellBeaker	PapacScienceAdvances2021	4250	M	50.011	15.2132
Bronze Age/Iron Age*	KOP003	KOP003	Czech_Bohemia_BellBeaker	PapacScienceAdvances2021	4342	M	50.011	15.2132
Bronze Age/Iron Age*	PRU002	PRU002	Czech_Bohemia_BellBeaker	PapacScienceAdvances2021	4470	F	50.0781	14.3122
Bronze Age/Iron Age*	PRU003	PRU003	Czech_Bohemia_BellBeaker	PapacScienceAdvances2021	4427	F	50.0781	14.3122
Bronze Age/Iron Age*	PRU005	PRU005	Czech_Bohemia_BellBeaker	PapacScienceAdvances2021	4350	F	50.0781	14.3122
Bronze Age/Iron Age*	TIS001	TIS001	Czech_Bohemia_BellBeaker	PapacScienceAdvances2021	4326	F	50.2834	14.5394
Bronze Age/Iron Age*	VLI022	VLI022	Czech_Bohemia_BellBeaker	PapacScienceAdvances2021	4265	F	50.3659	14.4466
Bronze Age/Iron Age*	VLI024	VLI024	Czech_Bohemia_BellBeaker	PapacScienceAdvances2021	4150	M	50.3659	14.4466
Bronze Age/Iron Age*	VLI026	VLI026	Czech_Bohemia_BellBeaker	PapacScienceAdvances2021	4150	F	50.3659	14.4466
Bronze Age/Iron Age*	VLI028	VLI028	Czech_Bohemia_BellBeaker	PapacScienceAdvances2021	4150	M	50.3659	14.4466
Bronze Age/Iron Age*	VLI029	VLI029	Czech_Bohemia_BellBeaker	PapacScienceAdvances2021	4150	M	50.3659	14.4466
Bronze Age/Iron Age*	VLI030	VLI030	Czech_Bohemia_BellBeaker	PapacScienceAdvances2021	4150	M	50.3659	14.4466
Bronze Age/Iron Age*	BUT002	BUT002	Czech_Bohemia_CordedWare	PapacScienceAdvances2021	4350	F	50.0524	14.345
Bronze Age/Iron Age*	BUT003	BUT003	Czech_Bohemia_CordedWare	PapacScienceAdvances2021	4335	M	50.0524	14.345
Bronze Age/Iron Age*	CAH005	CAH005	Czech_Bohemia_CordedWare	PapacScienceAdvances2021	4349	M	50.3731	13.3654
Bronze Age/Iron Age*	CAH010	CAH010	Czech_Bohemia_CordedWare	PapacScienceAdvances2021	4275	F	50.3731	13.3654
Bronze Age/Iron Age*	DRO001	DRO001	Czech_Bohemia_CordedWare	PapacScienceAdvances2021	4697	M	50.4369	13.4134
Bronze Age/Iron Age*	KON001	KON001	Czech_Bohemia_CordedWare	PapacScienceAdvances2021	4697	F	50.5557	13.6606
Bronze Age/Iron Age*	KON003	KON003	Czech_Bohemia_CordedWare	PapacScienceAdvances2021	4650	M	50.5557	13.6606
Bronze Age/Iron Age*	KON004	KON004	Czech_Bohemia_CordedWare	PapacScienceAdvances2021	4398	F	50.5557	13.6606
Bronze Age/Iron Age*	KON005	KON005	Czech_Bohemia_CordedWare	PapacScienceAdvances2021	4680	M	50.5557	13.6606
Bronze Age/Iron Age*	OBR001	OBR001	Czech_Bohemia_CordedWare	PapacScienceAdvances2021	4545	F	50.2927	14.4849
Bronze Age/Iron Age*	OBR003	OBR003	Czech_Bohemia_CordedWare	PapacScienceAdvances2021	4835	M	50.2927	14.4849
Bronze Age/Iron Age*	OBR004	OBR004	Czech_Bohemia_CordedWare	PapacScienceAdvances2021	4512	F	50.2927	14.4849
Bronze Age/Iron Age*	OHR002	OHR002	Czech_Bohemia_CordedWare	PapacScienceAdvances2021	4477	F	50.0462	14.337
Bronze Age/Iron Age*	PNL002	PNL002	Czech_Bohemia_CordedWare	PapacScienceAdvances2021	4653	M	50.2502	15.8113
Bronze Age/Iron Age*	STD001	STD001	Czech_Bohemia_CordedWare	PapacScienceAdvances2021	4500	M	50.6129	13.9612
Bronze Age/Iron Age*	STD002	STD002	Czech_Bohemia_CordedWare	PapacScienceAdvances2021	4720	M	50.6129	13.9612
Bronze Age/Iron Age*	TRM001	TRM001	Czech_Bohemia_CordedWare	PapacScienceAdvances2021	4650	M	50.6379	13.9923
Bronze Age/Iron Age*	TRM003	TRM003	Czech_Bohemia_CordedWare	PapacScienceAdvances2021	4620	F	50.6379	13.9923
Bronze Age/Iron Age*	TRM006	TRM006	Czech_Bohemia_CordedWare	PapacScienceAdvances2021	4644	M	50.6379	13.9923
Bronze Age/Iron Age*	VLI007	VLI007	Czech_Bohemia_CordedWare	PapacScienceAdvances2021	4739	F	50.3659	14.4466
Bronze Age/Iron Age*	VLI010	VLI010	Czech_Bohemia_CordedWare	PapacScienceAdvances2021	4483	F	50.3659	14.4466
Bronze Age/Iron Age*	VLI011	VLI011	Czech_Bohemia_CordedWare	PapacScienceAdvances2021	4718	M	50.3659	14.4466
Bronze Age/Iron Age*	VLI016	VLI016	Czech_Bohemia_CordedWare	PapacScienceAdvances2021	4345	M	50.3659	14.4466
Bronze Age/Iron Age*	VLI017	VLI017	Czech_Bohemia_CordedWare	PapacScienceAdvances2021	4336	F	50.3659	14.4466
Bronze Age/Iron Age*	VLI019	VLI019	Czech_Bohemia_CordedWare	PapacScienceAdvances2021	4500	M	50.3659	14.4466
Bronze Age/Iron Age*	VLI020	VLI020	Czech_Bohemia_CordedWare	PapacScienceAdvances2021	4446	F	50.3659	14.4466
Bronze Age/Iron Age*	VLI067	VLI067	Czech_Bohemia_CordedWare	PapacScienceAdvances2021	4718	F	50.3659	14.4466
Bronze Age/Iron Age*	VLI070	VLI070	Czech_Bohemia_CordedWare	PapacScienceAdvances2021	4351	F	50.3659	14.4466
Bronze Age/Iron Age*	VLI071	VLI071	Czech_Bohemia_CordedWare	PapacScienceAdvances2021	4715	F	50.3659	14.4466
Bronze Age/Iron Age*	VLI075	VLI075	Czech_Bohemia_CordedWare	PapacScienceAdvances2021	4650	M	50.3659	14.4466
Bronze Age/Iron Age*	VLI076	VLI076	Czech_Bohemia_CordedWare	PapacScienceAdvances2021	4906	F	50.3659	14.4466
Bronze Age/Iron Age*	VLI081	VLI081	Czech_Bohemia_CordedWare	PapacScienceAdvances2021	4650	M	50.3659	14.4466
Bronze Age/Iron Age*	VLI085	VLI085	Czech_Bohemia_CordedWare	PapacScienceAdvances2021	4653	M	50.3659	14.4466
Bronze Age/Iron Age*	VLI088	VLI088	Czech_Bohemia_CordedWare	PapacScienceAdvances2021	4736	F	50.3659	14.4466
Bronze Age/Iron Age*	VLI090	VLI090	Czech_Bohemia_CordedWare	PapacScienceAdvances2021	4768	F	50.3659	14.4466
Bronze Age/Iron Age*	VLI092	VLI092	Czech_Bohemia_CordedWare	PapacScienceAdvances2021	4719	M	50.3659	14.4466
Bronze Age/Iron Age*	ZEL001	ZEL001	Czech_Bohemia_CordedWare	PapacScienceAdvances2021	4350	F	50.1379	14.6599
Bronze Age/Iron Age*	BLS002	BLS002	Czech_Bohemia_GlobularAmphorae_N	PapacScienceAdvances2021	4692	F	50.3511	13.8521
Bronze Age/Iron Age*	PRE001	PRE001	Czech_Bohemia_GlobularAmphorae_N	PapacScienceAdvances2021	4625	F	50.2521	15.8119
Bronze Age/Iron Age*	VLI031	VLI031	Czech_Bohemia_GlobularAmphorae_N	PapacScienceAdvances2021	4510	M	50.3659	14.4466
Bronze Age/Iron Age*	VLI032	VLI032	Czech_Bohemia_GlobularAmphorae_N	PapacScienceAdvances2021	4682	M	50.3659	14.4466
Bronze Age/Iron Age*	KO1016	KO1016	Czech_Bohemia_Rivnac_N	PapacScienceAdvances2021	4750	F	50.0333	15.1681
Bronze Age/Iron Age*	TOU001	TOU001	Czech_Bohemia_Rivnac_N	PapacScienceAdvances2021	4712	M	50.1677	14.7226
Bronze Age/Iron Age*	TUC004	TUC004	Czech_Bohemia_Rivnac_N	PapacScienceAdvances2021	4940	M	50.1377	14.2734
Bronze Age/Iron Age*	TUC005	TUC005	Czech_Bohemia_Rivnac_N	PapacScienceAdvances2021	4940	M	50.1377	14.2734
Bronze Age/Iron Age*	TUC006	TUC006	Czech_Bohemia_Rivnac_N	PapacScienceAdvances2021	4879	F	50.1377	14.2734
Bronze Age/Iron Age*	VPR001	VPR001	Czech_Bohemia_Rivnac_N	PapacScienceAdvances2021	4756	M	50.1552	14.3181
Bronze Age/Iron Age*	BNL002	BNL002	Czech_Bohemia_Unetice_EBA	PapacScienceAdvances2021	3995	M	50.1742	14.6465
Bronze Age/Iron Age*	BNL003	BNL003	Czech_Bohemia_Unetice_EBA	PapacScienceAdvances2021	3995	M	50.1742	14.6465
Bronze Age/Iron Age*	BNL004	BNL004	Czech_Bohemia_Unetice_EBA	PapacScienceAdvances2021	3995	M	50.1742	14.6465
Bronze Age/Iron Age*	BNL005	BNL005	Czech_Bohemia_Unetice_EBA	PapacScienceAdvances2021	4084	F	50.1742	14.6465
Bronze Age/Iron Age*	BNL006	BNL006	Czech_Bohemia_Unetice_EBA	PapacScienceAdvances2021	4070	M	50.1742	14.6465
Bronze Age/Iron Age*	BNL008	BNL008	Czech_Bohemia_Unetice_EBA	PapacScienceAdvances2021	3926	F	50.1742	14.6465
Bronze Age/Iron Age*	BNL009	BNL009	Czech_Bohemia_Unetice_EBA	PapacScienceAdvances2021	3975	M	50.1742	14.6465
Bronze Age/Iron Age*	CHL001	CHL001	Czech_Bohemia_Unetice_EBA	PapacScienceAdvances2021	3905	F	50.215	15.1191
Bronze Age/Iron Age*	CHL002	CHL002	Czech_Bohemia_Unetice_EBA	PapacScienceAdvances2021	4000	M	50.215	15.1191
Bronze Age/Iron Age*	CHL008	CHL008	Czech_Bohemia_Unetice_EBA	PapacScienceAdvances2021	3960	M	50.215	15.1191
Bronze Age/Iron Age*	KNE001	KNE001	Czech_Bohemia_Unetice_EBA	PapacScienceAdvances2021	4017	F	50.1193	14.2671
Bronze Age/Iron Age*	KNE002	KNE002	Czech_Bohemia_Unetice_EBA	PapacScienceAdvances2021	4043	F	50.1193	14.2671
Bronze Age/Iron Age*	KNE003	KNE003	Czech_Bohemia_Unetice_EBA	PapacScienceAdvances2021	3971	F	50.1193	14.2671
Bronze Age/Iron Age*	KNE006	KNE006	Czech_Bohemia_Unetice_EBA	PapacScienceAdvances2021	4065	F	50.1193	14.2671
Bronze Age/Iron Age*	KNE007	KNE007	Czech_Bohemia_Unetice_EBA	PapacScienceAdvances2021	3977	F	50.1193	14.2671
Bronze Age/Iron Age*	KO1006	KO1006	Czech_Bohemia_Unetice_EBA	PapacScienceAdvances2021	3868	F	50.0333	15.1681
Bronze Age/Iron Age*	KO1008	KO1008	Czech_Bohemia_Unetice_EBA	PapacScienceAdvances2021	3805	M	50.0333	15.1681
Bronze Age/Iron Age*	KO1009	KO1009	Czech_Bohemia_Unetice_EBA	PapacScienceAdvances2021	3894	F	50.0333	15.1681
Bronze Age/Iron Age*	KO1010	KO1010	Czech_Bohemia_Unetice_EBA	PapacScienceAdvances2021	3906	F	50.0333	15.1681
Bronze Age/Iron Age*	KO1011	KO1011	Czech_Bohemia_Unetice_EBA	PapacScienceAdvances2021	3993	F	50.0333	15.1681
Bronze Age/Iron Age*	KO1013	KO1013	Czech_Bohemia_Unetice_EBA	PapacScienceAdvances2021	3914	F	50.0333	15.1681
Bronze Age/Iron Age*	KO1014	KO1014	Czech_Bohemia_Unetice_EBA	PapacScienceAdvances2021	3915	M	50.0333	15.1681
Bronze Age/Iron Age*	KO7001	KO7001	Czech_Bohemia_Unetice_EBA	PapacScienceAdvances2021	3985	M	50.0089	15.2217
Bronze Age/Iron Age*	KO7002	KO7002	Czech_Bohemia_Unetice_EBA	PapacScienceAdvances2021	4000	F	50.0089	15.2217
Bronze Age/Iron Age*	KO7003	KO7003	Czech_Bohemia_Unetice_EBA	PapacScienceAdvances2021	4124	M	50.0089	15.2217
Bronze Age/Iron Age*	MIB028	MIB028	Czech_Bohemia_Unetice_EBA	PapacScienceAdvances2021	3855	F	49.992	15.7769
Bronze Age/Iron Age*	MIG010	MIG010	Czech_Bohemia_Unetice_EBA	PapacScienceAdvances2021	3992	F	49.992	15.7769
Bronze Age/Iron Age*	MIG011	MIG011	Czech_Bohemia_Unetice_EBA	PapacScienceAdvances2021	3990	F	49.992	15.7769
Bronze Age/Iron Age*	MIS001	MIS001	Czech_Bohemia_Unetice_EBA	PapacScienceAdvances2021	3908	M	49.992	15.7769
Bronze Age/Iron Age*	MIS002	MIS002	Czech_Bohemia_Unetice_EBA	PapacScienceAdvances2021	3883	M	49.992	15.7769
Bronze Age/Iron Age*	MIS004	MIS004	Czech_Bohemia_Unetice_EBA	PapacScienceAdvances2021	3833	M	49.992	15.7769
Bronze Age/Iron Age*	MIS006	MIS006	Czech_Bohemia_Unetice_EBA	PapacScienceAdvances2021	4235	M	49.992	15.7769
Bronze Age/Iron Age*	PDA002	PDA002	Czech_Bohemia_Unetice_EBA	PapacScienceAdvances2021	4057	M	50.1519	14.4938
Bronze Age/Iron Age*	PMI001	PMI001	Czech_Bohemia_Unetice_EBA	PapacScienceAdvances2021	4096	F	50.1565	14.5387
Bronze Age/Iron Age*	PMI002	PMI002	Czech_Bohemia_Unetice_EBA	PapacScienceAdvances2021	4171	F	50.1565	14.5387
Bronze Age/Iron Age*	PMI003	PMI003	Czech_Bohemia_Unetice_EBA	PapacScienceAdvances2021	4005	F	50.1565	14.5387
Bronze Age/Iron Age*	PMI004	PMI004	Czech_Bohemia_Unetice_EBA	PapacScienceAdvances2021	4013	M	50.1565	14.5387
Bronze Age/Iron Age*	PMI006	PMI006	Czech_Bohemia_Unetice_EBA	PapacScienceAdvances2021	4104	M	50.1565	14.5387
Bronze Age/Iron Age*	PMI009	PMI009	Czech_Bohemia_Unetice_EBA	PapacScienceAdvances2021	3849	M	50.1565	14.5387
Bronze Age/Iron Age*	ROU001	ROU001	Czech_Bohemia_Unetice_EBA	PapacScienceAdvances2021	4000	F	50.4168	14.2455
Bronze Age/Iron Age*	ROU003	ROU003	Czech_Bohemia_Unetice_EBA	PapacScienceAdvances2021	3995	F	50.4168	14.2455
Bronze Age/Iron Age*	ROU004	ROU004	Czech_Bohemia_Unetice_EBA	PapacScienceAdvances2021	3995	F	50.4168	14.2455
Bronze Age/Iron Age*	ROU006	ROU006	Czech_Bohemia_Unetice_EBA	PapacScienceAdvances2021	4000	F	50.4168	14.2455
Bronze Age/Iron Age*	ROU007	ROU007	Czech_Bohemia_Unetice_EBA	PapacScienceAdvances2021	4000	M	50.4168	14.2455
Bronze Age/Iron Age*	VLI045	VLI045	Czech_Bohemia_Unetice_EBA	PapacScienceAdvances2021	3943	F	50.3659	14.4466
Bronze Age/Iron Age*	VLI046	VLI046	Czech_Bohemia_Unetice_EBA	PapacScienceAdvances2021	3809	F	50.3659	14.4466
Bronze Age/Iron Age*	VLI047	VLI047	Czech_Bohemia_Unetice_EBA	PapacScienceAdvances2021	3800	F	50.3659	14.4466
Bronze Age/Iron Age*	VLI058	VLI058	Czech_Bohemia_Unetice_EBA	PapacScienceAdvances2021	4066	F	50.3659	14.4466
Bronze Age/Iron Age*	VLI060	VLI060	Czech_Bohemia_Unetice_EBA	PapacScienceAdvances2021	3930	F	50.3659	14.4466
Bronze Age/Iron Age*	VLI061	VLI061	Czech_Bohemia_Unetice_EBA	PapacScienceAdvances2021	4000	F	50.3659	14.4466
Bronze Age/Iron Age*	VLI065	VLI065	Czech_Bohemia_Unetice_EBA	PapacScienceAdvances2021	3936	F	50.3659	14.4466
Bronze Age/Iron Age*	I6695	I6695	Czech_CordedWare	NarasimhanPattersonScience2019	4575	F	50.5481	13.7761
Bronze Age/Iron Age*	I6696	I6696	Czech_CordedWare	NarasimhanPattersonScience2019	4575	M	50.5429	14.0659
Bronze Age/Iron Age*	I7207	I7207	Czech_CordedWare	NarasimhanPattersonScience2019	4370	M	50.4103	14.0746
Bronze Age/Iron Age*	I7208	I7208	Czech_CordedWare	NarasimhanPattersonScience2019	4324	M	50.4103	14.0746
Bronze Age/Iron Age*	I7209	I7209	Czech_CordedWare	NarasimhanPattersonScience2019	4269	M	50.4103	14.0746
Bronze Age/Iron Age*	I7279	I7279	Czech_CordedWare	OlaldeNature2018	4200	M	50.19	14.158
Bronze Age/Iron Age*	I7280	I7280	Czech_CordedWare	OlaldeNature2018	4200	M	50.19	14.158
Bronze Age/Iron Age*	I7195	I7195	Czech_EBA	OlaldeNature2018	4250	F	50.0504	14.3667
Bronze Age/Iron Age*	I7196	I7196	Czech_EBA	OlaldeNature2018	4250	M	50.0504	14.3667
Bronze Age/Iron Age*	I7198	I7198	Czech_EBA	OlaldeNature2018	4026	F	50.0504	14.3667
Bronze Age/Iron Age*	I7199	I7199	Czech_EBA	OlaldeNature2018	4039	M	50.0504	14.3667
Bronze Age/Iron Age*	I7200	I7200	Czech_EBA	OlaldeNature2018	4250	F	50.0504	14.3667
Bronze Age/Iron Age*	I7201	I7201	Czech_EBA	OlaldeNature2018	4250	F	50.0504	14.3667
Bronze Age/Iron Age*	I7202	I7202	Czech_EBA	OlaldeNature2018	4250	M	50.0504	14.3667
Bronze Age/Iron Age*	I7203	I7203	Czech_EBA	OlaldeNature2018	4250	M	50.0504	14.3667
Bronze Age/Iron Age*	I5037	I5037	Czech_EBA_Protounetice	OlaldeNature2018	4100	M	48.8019	17.0233
Bronze Age/Iron Age*	I5042	I5042	Czech_EBA_Protounetice	OlaldeNature2018	4100	M	48.8019	17.0233
Bronze Age/Iron Age*	I4139	RISE577.SG	Czech_EBA_Starounetice_dup.I4139.SG	AllentoftNature2015	4150	F	50.16	14.311
Bronze Age/Iron Age*	I4130	RISE586.SG	Czech_EBA_Unetice	OlaldeNature2018 (known there as I5044)	4250	F	48.799	17.022
Bronze Age/Iron Age*	VK214	VK214.SG	Denmark_LN_BA.SG	MargaryanWillerslevNature2020	3838	F	55.73	12.12
Bronze Age/Iron Age*	RISE42	RISE42.SG	Denmark_LN.SG	AllentoftNature2015	4021	M	55.657	12.148
Bronze Age/Iron Age*	RISE71	RISE71.SG	Denmark_LN.SG	AllentoftNature2015	4040	F	56.676	10.034
Bronze Age/Iron Age*	RISE61	RISE61.SG	Denmark_MN_B.SG	AllentoftNature2015	4569	M	55.703	11.855
Bronze Age/Iron Age*	I1770	I1770	England_BellBeaker	OlaldeNature2018	3950	F	54.2019	-0.434355
Bronze Age/Iron Age*	I2418	I2418	England_BellBeaker	OlaldeNature2018	4237	F	51.168	-1.77254
Bronze Age/Iron Age*	I2443	I2443	England_BellBeaker	OlaldeNature2018	4091	F	51.7977	-1.31346
Bronze Age/Iron Age*	I2445	I2445	England_BellBeaker	OlaldeNature2018	4048	M	51.7977	-1.31346
Bronze Age/Iron Age*	I2447	I2447	England_BellBeaker	OlaldeNature2018	3938	M	51.7977	-1.31346
Bronze Age/Iron Age*	I2450	I2450	England_BellBeaker	OlaldeNature2018	4248	F	51.68	-1.297
Bronze Age/Iron Age*	I2452	I2452	England_BellBeaker	OlaldeNature2018	4052	M	52.854	-1.565
Bronze Age/Iron Age*	I2453	I2453	England_BellBeaker	OlaldeNature2018	4122	M	52.67	-0.35
Bronze Age/Iron Age*	I2455	I2455	England_BellBeaker	OlaldeNature2018	3948	F	52.34	0.03
Bronze Age/Iron Age*	I3255	I3255	England_BellBeaker	OlaldeNature2018	3994	F	52.1703	0.105604
Bronze Age/Iron Age*	I3256	I3256	England_BellBeaker	OlaldeNature2018	4063	M	52.1703	0.105604
Bronze Age/Iron Age*	I4950	I4950	England_BellBeaker	OlaldeNature2018	4250	M	51.2899	-1.80723
Bronze Age/Iron Age*	I4951	I4951	England_BellBeaker	OlaldeNature2018	4250	M	51.24	-1.76
Bronze Age/Iron Age*	I5382	I5382	England_BellBeaker	OlaldeNature2018	4070	M	54.5228	-1.30813
Bronze Age/Iron Age*	I5512	I5512	England_BellBeaker	OlaldeNature2018	4250	F	51.24	-1.76
Bronze Age/Iron Age*	I5513	I5513	England_BellBeaker	OlaldeNature2018	4250	M	51.22	-1.77
Bronze Age/Iron Age*	I6679	I6679	England_BellBeaker	OlaldeNature2018	3936	M	55.31	-1.55333
Bronze Age/Iron Age*	I6775	I6775	England_BellBeaker	OlaldeNature2018	4150	M	51.1213	-3.07565
Bronze Age/Iron Age*	I6778	I6778	England_BellBeaker	OlaldeNature2018	4150	F	51.1471	-1.81253
Bronze Age/Iron Age*	I2416	I2416	England_BellBeaker_highEEF	OlaldeNature2018	4239	M	51.168	-1.77254
Bronze Age/Iron Age*	I1765	I1765_d	England_BellBeaker_lc	OlaldeNature2018	4156	U	54.5228	-1.30813
Bronze Age/Iron Age*	I2417	I2417	England_BellBeaker_lowEEF	OlaldeNature2018	4250	M	51.168	-1.77254
Bronze Age/Iron Age*	I2454	I2454	England_BellBeaker_lowEEF	OlaldeNature2018	4042	F	52.34	0.03
Bronze Age/Iron Age*	I2459	I2459	England_BellBeaker_lowEEF	OlaldeNature2018	4231	F	51.168	-1.77254
Bronze Age/Iron Age*	I5376	I5376	England_BellBeaker_lowEEF	OlaldeNature2018	4216	F	51.4742	-0.309898
Bronze Age/Iron Age*	I6774	I6774	England_BellBeaker_lowEEF	OlaldeNature2018	4121	M	50.8625	-0.121506
Bronze Age/Iron Age*	I1767	I1767	England_BellBeaker_mediumEEF	OlaldeNature2018	4045	M	54.5228	-1.30813
Bronze Age/Iron Age*	I5379	I5379	England_BellBeaker_mediumEEF	OlaldeNature2018	4333	M	50.9192	-2.01544
Bronze Age/Iron Age*	I2565	I2565_published	England_BellBeaker_published_lc	OlaldeNature2018	4237	M	51.168	-1.77254
Bronze Age/Iron Age*	I2457	I2457	England_C_EBA	OlaldeNature2018	4056	M	51.168	-1.77254
Bronze Age/Iron Age*	I2460	I2460	England_C_EBA	OlaldeNature2018	3875	F	51.168	-1.77254
Bronze Age/Iron Age*	I2461	I2461	England_C_EBA	OlaldeNature2018	3975	F	51.13	-1.69
Bronze Age/Iron Age*	I2566	I2566	England_C_EBA	OlaldeNature2018	4078	M	51.168	-1.77254
Bronze Age/Iron Age*	I2597	I2597	England_C_EBA	OlaldeNature2018	4080	M	51.168	-1.77254
Bronze Age/Iron Age*	I2601	I2601	England_C_EBA	OlaldeNature2018	3808	F	51.33	1.36
Bronze Age/Iron Age*	I2604	I2604	England_C_EBA	OlaldeNature2018	4073	F	51.15	-1.36
Bronze Age/Iron Age*	I2609	I2609	England_C_EBA	OlaldeNature2018	3848	F	54.979	-2.123
Bronze Age/Iron Age*	I2612	I2612	England_C_EBA	OlaldeNature2018	4293	F	54.883	-1.452
Bronze Age/Iron Age*	I2618	I2618	England_C_EBA	OlaldeNature2018	3993	M	55.058	-2.147
Bronze Age/Iron Age*	I6777	I6777	England_C_EBA	OlaldeNature2018	4050	M	51.1471	-1.81253
Bronze Age/Iron Age*	I7635	I7635	England_C_EBA	OlaldeNature2018	4030	F	54.5228	-1.30813
Bronze Age/Iron Age*	I2462	I2462	England_C_EBA_highEEF	OlaldeNature2018	3942	F	51.33	1.36
Bronze Age/Iron Age*	I5373	I5373	England_C_EBA_lowEEF	OlaldeNature2018	4034	M	53.0798	-1.64094
Bronze Age/Iron Age*	I2598	I2598_published	England_C_EBA_published	OlaldeNature2018	3998	M	51.168	-1.77254
Bronze Age/Iron Age*	I5374	I5374	England_N	OlaldeNature2018	4480	M	51.279	-2.74332
Bronze Age/Iron Age*	TU918(SX32)	TU918_SX32	France_Alsace_Lingolsheim_EBA	FurtwanglerNatureCommunications2020	4289	M	48.5545	7.68175
Bronze Age/Iron Age*	I1381	I1381	France_BellBeaker	OlaldeNature2018	4250	M	49.153	6.102
Bronze Age/Iron Age*	I1382	I1382	France_BellBeaker	OlaldeNature2018	4195	M	49.153	6.102
Bronze Age/Iron Age*	I1390	I1390	France_BellBeaker	OlaldeNature2018	4331	M	47.65	7.45
Bronze Age/Iron Age*	I3874	I3874	France_BellBeaker	OlaldeNature2018	4065	F	44.476	6.369
Bronze Age/Iron Age*	I3875	I3875	France_BellBeaker	OlaldeNature2018	3985	M	44.476	6.369
Bronze Age/Iron Age*	I1388	I1388	France_BellBeaker_LowSteppe*	OlaldeNature2018	4198	M	45.46	6.213
Bronze Age/Iron Age*	I1392	I1392	France_BellBeaker_NoSteppe*	OlaldeNature2018	4516	F	47.56	7.52
Bronze Age/Iron Age*	I1391	I1391_published	France_BellBeaker_published	OlaldeNature2018	4179	F	47.96	7.3
Bronze Age/Iron Age*	I2575	I2575_published	France_BellBeaker_published	OlaldeNature2018	4323	M	43.9655	5.8126
Bronze Age/Iron Age*	BIS130	BIS130.SG	France_GrandEst_EBA.SG	BrunelPNAS2020	3850	M	48.0983	7.43701
Bronze Age/Iron Age*	BIS385	BIS385.SG	France_GrandEst_EBA.SG	BrunelPNAS2020	3850	F	48.0983	7.43701
Bronze Age/Iron Age*	PSS4170	PSS4170.SG	France_GrandEst_EBA.SG	BrunelPNAS2020	4030	M	48.5185	3.59633
Bronze Age/Iron Age*	CBV95	CBV95.SG	France_HautsDeFrance_LN.SG	BrunelPNAS2020	4447	M	49.3623	3.46272
Bronze Age/Iron Age*	TORTC	TORTC.SG	France_LaClape_LN_EBA_Veraza.SG	SeguinOrlandoCurrBio2021	4476	F	43.1498	3.06054
Bronze Age/Iron Age*	TORTD	TORTD.SG	France_LaClape_LN_EBA_Veraza.SG	SeguinOrlandoCurrBio2021	4973	M	43.1498	3.06054
Bronze Age/Iron Age*	TORTE	TORTE.SG	France_LaClape_LN_EBA_Veraza.SG	SeguinOrlandoCurrBio2021	4574	F	43.1498	3.06054
Bronze Age/Iron Age*	GBVPK	GBVPK.SG	France_LaClape_LN_EMBA_BellBeakerPossible.SG	SeguinOrlandoCurrBio2021	4336	M	43.1491	3.06058
Bronze Age/Iron Age*	MAS15	MAS15.SG	France_MasRouge_LN_Ferrieres.SG	SeguinOrlandoCurrBio2021	4950	F	43.1491	3.06058
Bronze Age/Iron Age*	1H04	1H04.SG	France_MontAime_MLN.SG	SeguinOrlandoCurrBio2021	4851	F	48.8589	3.99647
Bronze Age/Iron Age*	1H13	1H13.SG	France_MontAime_MLN.SG	SeguinOrlandoCurrBio2021	4950	M	48.8589	3.99647
Bronze Age/Iron Age*	EUG11	EUG11.SG	France_Occitanie_EBA.SG	BrunelPNAS2020	3882	M	43.162	2.3116
Bronze Age/Iron Age*	PIR3037AB	PIR3037AB.SG	France_Occitanie_EBA.SG	BrunelPNAS2020	3995	M	43.2516	3.2202
Bronze Age/Iron Age*	PIR3116B	PIR3116B.SG	France_Occitanie_EBA.SG	BrunelPNAS2020	4170	M	43.2516	3.2202
Bronze Age/Iron Age*	PEI10	PEI10.SG	France_Occitanie_LN.SG	BrunelPNAS2020	4736	F	43.1355	2.2519
Bronze Age/Iron Age*	PEI2	PEI2.SG	France_Occitanie_LN.SG	BrunelPNAS2020	4750	F	43.1355	2.2519
Bronze Age/Iron Age*	I0108	I0108	Germany_BellBeaker	MathiesonNature2015 (1240k of same same sample with 390k in HaakLazaridis2015)	4399	F	51.45	11.54
Bronze Age/Iron Age*	I0111	I0111	Germany_BellBeaker	MathiesonNature2015 (1240k of same same sample with 390k in HaakLazaridis2015)	4303	F	51.45	11.54
Bronze Age/Iron Age*	I0112	I0112	Germany_BellBeaker	MathiesonNature2015 (1240k of same same sample with 390k in HaakLazaridis2015)	4224	F	51.791	11.141
Bronze Age/Iron Age*	I0113	I0113	Germany_BellBeaker	MathiesonNature2015 (1240k of same same sample with 390k in HaakLazaridis2015)	4146	F	51.791	11.141
Bronze Age/Iron Age*	I0806	I0806	Germany_BellBeaker	MathiesonNature2015 (1240k of same same sample with 390k in HaakLazaridis2015)	4217	M	51.79	11.14
Bronze Age/Iron Age*	I1546	I1546	Germany_BellBeaker	MathiesonNature2015	4225	F	51.82	10.91
Bronze Age/Iron Age*	I1549	I1549	Germany_BellBeaker	MathiesonNature2015	4225	F	51.82	10.91
Bronze Age/Iron Age*	I3588	I3588	Germany_BellBeaker	OlaldeNature2018	4175	M	48.8833	12.5332
Bronze Age/Iron Age*	I3589	I3589	Germany_BellBeaker	OlaldeNature2018	4175	M	48.8833	12.5332
Bronze Age/Iron Age*	I3590	I3590	Germany_BellBeaker	OlaldeNature2018	4186	F	48.8833	12.5332
Bronze Age/Iron Age*	I3594	I3594	Germany_BellBeaker	OlaldeNature2018	4175	F	48.8833	12.5332
Bronze Age/Iron Age*	I3600	I3600	Germany_BellBeaker	OlaldeNature2018	4175	F	48.8833	12.5332
Bronze Age/Iron Age*	I3601	I3601	Germany_BellBeaker	OlaldeNature2018	4175	F	48.8833	12.5332
Bronze Age/Iron Age*	I4143	RISE562.SG	Germany_BellBeaker	OlaldeNature2018 (known there as I5020)	4267	F	48.663	12.707
Bronze Age/Iron Age*	I5014	I5014	Germany_BellBeaker	OlaldeNature2018	4200	F	48.711	11.453
Bronze Age/Iron Age*	I5023	I5023	Germany_BellBeaker	OlaldeNature2018	4200	F	48.691	13.016
Bronze Age/Iron Age*	I5523	I5523	Germany_BellBeaker	OlaldeNature2018	4250	F	48.663	12.707
Bronze Age/Iron Age*	I5524	I5524	Germany_BellBeaker	OlaldeNature2018	4250	F	48.663	12.707
Bronze Age/Iron Age*	I5525	I5525	Germany_BellBeaker	OlaldeNature2018	4250	F	48.663	12.707
Bronze Age/Iron Age*	I5527	I5527	Germany_BellBeaker	OlaldeNature2018	4250	F	48.711	11.453
Bronze Age/Iron Age*	I5529	I5529	Germany_BellBeaker	OlaldeNature2018	4250	M	48.691	13.016
Bronze Age/Iron Age*	I5531	I5531	Germany_BellBeaker	OlaldeNature2018	4250	F	48.7059	11.3254
Bronze Age/Iron Age*	I5658	I5658	Germany_BellBeaker	OlaldeNature2018	4200	F	48.841	12.75
Bronze Age/Iron Age*	I5659	I5659	Germany_BellBeaker	OlaldeNature2018	4200	M	48.841	12.75
Bronze Age/Iron Age*	I5833	I5833	Germany_BellBeaker	OlaldeNature2018	4200	M	48.841	12.75
Bronze Age/Iron Age*	I5834	I5834	Germany_BellBeaker	OlaldeNature2018	4200	F	48.841	12.75
Bronze Age/Iron Age*	I5836	I5836	Germany_BellBeaker	OlaldeNature2018	4250	F	49.6529	8.32768
Bronze Age/Iron Age*	I6482	I6482	Germany_BellBeaker	OlaldeNature2018	4250	F	48.7059	11.3254
Bronze Age/Iron Age*	I6590	I6590	Germany_BellBeaker	OlaldeNature2018	4200	F	48.841	12.75
Bronze Age/Iron Age*	I6591	I6591	Germany_BellBeaker	OlaldeNature2018	4200	F	48.841	12.75
Bronze Age/Iron Age*	I6624	I6624	Germany_BellBeaker	OlaldeNature2018	4200	F	48.841	12.75
Bronze Age/Iron Age*	I4134	RISE564.SG	Germany_BellBeaker_dup.I4134.SG	AllentoftNature2015	4200	M	48.691	13.016
Bronze Age/Iron Age*	I4144	RISE563.SG	Germany_BellBeaker_dup.I4144.SG	AllentoftNature2015	4411	M	48.691	13.016
Bronze Age/Iron Age*	I0060	I0060_published	Germany_BellBeaker_published	MathiesonNature2015	4214	F	51.45	11.54
Bronze Age/Iron Age*	I3602	I3602_published	Germany_BellBeaker_published	OlaldeNature2018	4175	F	48.8833	12.5332
Bronze Age/Iron Age*	I3604	I3604_published	Germany_BellBeaker_published	OlaldeNature2018	4200	M	48.6639	13.0736
Bronze Age/Iron Age*	I4249	I4249_published	Germany_BellBeaker_published	OlaldeNature2018	4186	F	48.841	12.75
Bronze Age/Iron Age*	I4250	I4250_published	Germany_BellBeaker_published	OlaldeNature2018	4220	F	48.841	12.75
Bronze Age/Iron Age*	I5655	I5655_published	Germany_BellBeaker_published	OlaldeNature2018	4200	F	48.841	12.75
Bronze Age/Iron Age*	I5661	I5661_published	Germany_BellBeaker_published	OlaldeNature2018	4200	M	48.841	12.75
Bronze Age/Iron Age*	I5663	I5663_published	Germany_BellBeaker_published	OlaldeNature2018	4200	M	48.841	12.75
Bronze Age/Iron Age*	I0059	I0059	Germany_BenzigerodeHeimburg_LN	MathiesonNature2015 (1240k of same same sample with 390k in HaakLazaridis2015)	4179	F	51.82	10.91
Bronze Age/Iron Age*	I0171	I0171	Germany_BenzigerodeHeimburg_LN	MathiesonNature2015 (1240k of same same sample with 390k in HaakLazaridis2015)	4118	F	51.82	10.91
Bronze Age/Iron Age*	I0049	I0049	Germany_CordedWare	MathiesonNature2015 (1240k of same same sample with 390k in HaakLazaridis2015)	4295	F	51.42	11.68
Bronze Age/Iron Age*	I0103	I0103	Germany_CordedWare	MathiesonNature2015 (1240k of same same sample with 390k in HaakLazaridis2015)	4472	F	51.42	11.68
Bronze Age/Iron Age*	I0104	I0104	Germany_CordedWare	MathiesonNature2015 (1240k of same same sample with 390k in HaakLazaridis2015)	4358	M	51.42	11.68
Bronze Age/Iron Age*	I0106	I0106	Germany_CordedWare	MathiesonNature2015 (1240k of same same sample with 390k in HaakLazaridis2015)	4297	F	51.42	11.68
Bronze Age/Iron Age*	I1532	I1532	Germany_CordedWare	MathiesonNature2015	4225	M	51.42	11.68
Bronze Age/Iron Age*	I1536	I1536	Germany_CordedWare	MathiesonNature2015	4225	M	51.42	11.68
Bronze Age/Iron Age*	I1538	I1538	Germany_CordedWare	MathiesonNature2015	4225	M	51.42	11.68
Bronze Age/Iron Age*	I1539	I1539	Germany_CordedWare	MathiesonNature2015	4420	F	51.42	11.68
Bronze Age/Iron Age*	I1542	I1542	Germany_CordedWare	MathiesonNature2015	4225	M	51.42	11.68
Bronze Age/Iron Age*	I1544	I1544	Germany_CordedWare	MathiesonNature2015	4225	M	51.42	11.68
Bronze Age/Iron Age*	RISE434	RISE434.SG	Germany_CordedWare.SG	AllentoftNature2015	4703	M	48.932	12.259
Bronze Age/Iron Age*	RISE446	RISE446.SG	Germany_CordedWare.SG	AllentoftNature2015	4486	M	50.009	10.18
Bronze Age/Iron Age*	I0115	I0115	Germany_EBA_Unetice	MathiesonNature2015 (1240k of same same sample with 390k in HaakLazaridis2015)	3815	F	51.42	11.68
Bronze Age/Iron Age*	I0116	I0116	Germany_EBA_Unetice	MathiesonNature2015 (1240k of same same sample with 390k in HaakLazaridis2015)	3978	M	51.42	11.68
Bronze Age/Iron Age*	I0117	I0117	Germany_EBA_Unetice	MathiesonNature2015 (1240k of same same sample with 390k in HaakLazaridis2015)	4092	F	51.42	11.68
Bronze Age/Iron Age*	I0164	I0164	Germany_EBA_Unetice	MathiesonNature2015 (1240k of same same sample with 390k in HaakLazaridis2015)	3906	F	51.793	11.143
Bronze Age/Iron Age*	I0803	I0803	Germany_EBA_Unetice	MathiesonNature2015 (1240k of same same sample with 390k in HaakLazaridis2015)	3977	F	51.1677	11.8475
Bronze Age/Iron Age*	I0804	I0804	Germany_EBA_Unetice	MathiesonNature2015 (1240k of same same sample with 390k in HaakLazaridis2015)	4010	M	51.1677	11.8475
Bronze Age/Iron Age*	I0047	I0047_published	Germany_EBA_Unetice_published	MathiesonNature2015	3923	F	51.8958	11.0467
Bronze Age/Iron Age*	HUGO_167	HUGO_167	Germany_Lech_BellBeaker	MittnikScience2019	4089	U	48.3285	10.8982
Bronze Age/Iron Age*	HUGO_169Sk1	HUGO_169Sk1_d	Germany_Lech_BellBeaker	MittnikScience2019	4385	M	48.3285	10.8982
Bronze Age/Iron Age*	I4124	RISE559.SG	Germany_Lech_BellBeaker	OlaldeNature2018 (known there as I5017)	4278	F	48.33	10.895
Bronze Age/Iron Age*	I5519	I5519	Germany_Lech_BellBeaker	OlaldeNature2018	4200	M	48.33	10.895
Bronze Age/Iron Age*	I5520	I5520	Germany_Lech_BellBeaker	OlaldeNature2018	4250	F	48.33	10.895
Bronze Age/Iron Age*	I5521	I5521	Germany_Lech_BellBeaker	OlaldeNature2018	4250	F	48.33	10.895
Bronze Age/Iron Age*	WEHR_1192SkA	WEHR_1192SkA	Germany_Lech_BellBeaker	MittnikScience2019	4193	M	48.2528	10.8088
Bronze Age/Iron Age*	UNTA121_FK61	UNTA121_FK61	Germany_Lech_CordedWare	MittnikScience2019	4795	M	48.3118	10.8897
Bronze Age/Iron Age*	UNTA89_FK231	UNTA89_FK231	Germany_Lech_CordedWare	MittnikScience2019	4704	M	48.3171	10.8888
Bronze Age/Iron Age*	AITI_36	AITI_36	Germany_Lech_EBA	MittnikScience2019	3836	M	48.2228	10.845
Bronze Age/Iron Age*	OBKR_6	OBKR_6	Germany_Lech_EBA	MittnikScience2019	3921	F	48.2666	10.8786
Bronze Age/Iron Age*	OBKR_76	OBKR_76	Germany_Lech_EBA	MittnikScience2019	3863	F	48.2666	10.8786
Bronze Age/Iron Age*	OBKR_80	OBKR_80	Germany_Lech_EBA	MittnikScience2019	4000	M	48.2666	10.8786
Bronze Age/Iron Age*	OBKR_82	OBKR_82	Germany_Lech_EBA	MittnikScience2019	3908	F	48.2666	10.8786
Bronze Age/Iron Age*	OBKR_84	OBKR_84	Germany_Lech_EBA	MittnikScience2019	3875	F	48.2666	10.8786
Bronze Age/Iron Age*	POST_16	POST_16	Germany_Lech_EBA	MittnikScience2019	3922	F	48.2957	10.891
Bronze Age/Iron Age*	POST_2	POST_2	Germany_Lech_EBA	MittnikScience2019	3971	F	48.2957	10.891
Bronze Age/Iron Age*	POST_28	POST_28	Germany_Lech_EBA	MittnikScience2019	3917	M	48.2957	10.891
Bronze Age/Iron Age*	POST_47	POST_47	Germany_Lech_EBA	MittnikScience2019	3997	M	48.2957	10.891
Bronze Age/Iron Age*	POST_85	POST_85	Germany_Lech_EBA	MittnikScience2019	3946	M	48.2957	10.891
Bronze Age/Iron Age*	UNTA58_149	UNTA58_149	Germany_Lech_EBA	MittnikScience2019	3904	M	48.3161	10.8915
Bronze Age/Iron Age*	UNTA58_153	UNTA58_153	Germany_Lech_EBA	MittnikScience2019	3839	M	48.3161	10.8915
Bronze Age/Iron Age*	UNTA85_1412	UNTA85_1412	Germany_Lech_EBA	MittnikScience2019	3910	M	48.3197	10.8915
Bronze Age/Iron Age*	I0118	I0118	Germany_LN_Alberstedt	MathiesonNature2015 (1240k of same same sample with 390k in HaakLazaridis2015)	4325	F	51.45	11.63
Bronze Age/Iron Age*	I0550	I0550	Germany_LN_Karsdorf	MathiesonNature2015 (1240k of same same sample with 390k in HaakLazaridis2015)	4469	F	51.2831	11.65
Bronze Age/Iron Age*	MX259	MX259	Germany_SouthernGermany_Anselfingen_EBA	FurtwanglerNatureCommunications2020	4246	M	47.8541	8.77374
Bronze Age/Iron Age*	MX252	MX252	Germany_SouthernGermany_Singen_EBA	FurtwanglerNatureCommunications2020	3808	M	47.7671	8.87224
Bronze Age/Iron Age*	MX254	MX254	Germany_SouthernGermany_Singen_EBA	FurtwanglerNatureCommunications2020	3900	M	47.7671	8.87224
Bronze Age/Iron Age*	MX256	MX256	Germany_SouthernGermany_Singen_EBA	FurtwanglerNatureCommunications2020	3963	F	47.7671	8.87224
Bronze Age/Iron Age*	MX258	MX258	Germany_SouthernGermany_Singen_EBA	FurtwanglerNatureCommunications2020	3917	M	47.7671	8.87224
Bronze Age/Iron Age*	MX270	MX270	Germany_SouthernGermany_Singen_EBA	FurtwanglerNatureCommunications2020	3900	M	47.7671	8.87224
Bronze Age/Iron Age*	MX280	MX280	Germany_SouthernGermany_Singen_EBA	FurtwanglerNatureCommunications2020	3931	F	47.7671	8.87224
Bronze Age/Iron Age*	MX288	MX288	Germany_SouthernGermany_Singen_EBA	FurtwanglerNatureCommunications2020	4051	M	47.7671	8.87224
Bronze Age/Iron Age*	ALT_1	ALT_1	Germany_Tauber_CordedWare	MittnikScience2019	4463	U	49.4683	9.74407
Bronze Age/Iron Age*	ALT_2	ALT_2	Germany_Tauber_CordedWare_lc	MittnikScience2019	4425	F	49.4683	9.74407
Bronze Age/Iron Age*	I0070	I0070	Greece_Minoan_Lassithi	LazaridisNature2017	4000	M	35.08	25.83
Bronze Age/Iron Age*	I0071	I0071	Greece_Minoan_Lassithi	LazaridisNature2017	4000	F	35.08	25.83
Bronze Age/Iron Age*	I0073	I0073	Greece_Minoan_Lassithi	LazaridisNature2017	4000	M	35.08	25.83
Bronze Age/Iron Age*	I0074	I0074	Greece_Minoan_Lassithi	LazaridisNature2017	4000	F	35.08	25.83
Bronze Age/Iron Age*	I9005	I9005	Greece_Minoan_Lassithi	LazaridisNature2017	4000	F	35.08	25.83
Bronze Age/Iron Age*	I9127	I9127	Greece_Minoan_Odigitria	LazaridisNature2017	3895	F	35.0514	24.8136
Bronze Age/Iron Age*	I9128	I9128	Greece_Minoan_Odigitria	LazaridisNature2017	3895	F	35.0514	24.8136
Bronze Age/Iron Age*	I9129	I9129	Greece_Minoan_Odigitria	LazaridisNature2017	3895	F	35.0514	24.8136
Bronze Age/Iron Age*	I9130	I9130	Greece_Minoan_Odigitria	LazaridisNature2017	3895	M	35.0514	24.8136
Bronze Age/Iron Age*	I9131	I9131	Greece_Minoan_Odigitria	LazaridisNature2017	3895	F	35.0514	24.8136
Bronze Age/Iron Age*	I2364	I2364	Hungary_EBA_BellBeaker	OlaldeNature2018	4220	M	47.5992	19.0546
Bronze Age/Iron Age*	I2365	I2365	Hungary_EBA_BellBeaker	OlaldeNature2018	4299	M	47.5992	19.0546
Bronze Age/Iron Age*	I2741	I2741	Hungary_EBA_BellBeaker	OlaldeNature2018	4245	M	47.3832	19.0203
Bronze Age/Iron Age*	I2786	I2786	Hungary_EBA_BellBeaker	OlaldeNature2018	4270	M	47.3832	19.0203
Bronze Age/Iron Age*	I2787	I2787	Hungary_EBA_BellBeaker	OlaldeNature2018	4254	M	47.3832	19.0203
Bronze Age/Iron Age*	I3528	I3528	Hungary_EBA_BellBeaker	OlaldeNature2018	4364	M	47.6209	19.0449
Bronze Age/Iron Age*	I3529	I3529	Hungary_EBA_BellBeaker	OlaldeNature2018	4300	F	47.6209	19.0449
Bronze Age/Iron Age*	I4178	I4178	Hungary_EBA_BellBeaker	OlaldeNature2018	4300	M	47.3832	19.0203
Bronze Age/Iron Age*	I7044	I7044	Hungary_EBA_BellBeaker	OlaldeNature2018	4300	M	47.43	19.052
Bronze Age/Iron Age*	I7045	I7045	Hungary_EBA_BellBeaker	OlaldeNature2018	4231	F	47.43	19.052
Bronze Age/Iron Age*	I1502	I1502	Hungary_EBA_Mako	MathiesonNature2015 (capture of same sample shotgunned in Gamba2014)	4026	F	47.167	20.833
Bronze Age/Iron Age*	I7040	I7040	Hungary_EBA_Protonagyrev	OlaldeNature2018	4300	F	47.43	19.052
Bronze Age/Iron Age*	I7043	I7043	Hungary_EBA_Protonagyrev	OlaldeNature2018	4011	M	47.43	19.052
Bronze Age/Iron Age*	RISE349	RISE349.SG	Hungary_Maros_EBA.SG	AllentoftNature2015	3893	F	46.356	20.985
Bronze Age/Iron Age*	RISE371	RISE371.SG	Hungary_Maros_EBA.SG	AllentoftNature2015	3982	F	46.22	20.199
Bronze Age/Iron Age*	CAK530	CAK530.SG	Ireland_LN.SG	CassidyNature2020	4711	F	54.0586	-8.38206
Bronze Age/Iron Age*	CAK531	CAK531.SG	Ireland_LN.SG	CassidyNature2020	4701	M	54.0586	-8.38206
Bronze Age/Iron Age*	CAK532	CAK532.SG	Ireland_LN.SG	CassidyNature2020	4892	M	54.0586	-8.38206
Bronze Age/Iron Age*	CAK533	CAK533.SG	Ireland_LN.SG	CassidyNature2020	4926	F	54.0586	-8.38206
Bronze Age/Iron Age*	CAK68	CAK68.SG	Ireland_LN.SG	CassidyNature2020	4503	M	54.0586	-8.38206
Bronze Age/Iron Age*	CAK534	CAK534.SG	Ireland_N.SG	CassidyNature2020	4800	M	54.0586	-8.38206
Bronze Age/Iron Age*	R4	R4.SG	Italy_C.SG	AntonioGaoMootsScience2019	4841	M	41.96	13.54
Bronze Age/Iron Age*	R5	R5.SG	Italy_C.SG	AntonioGaoMootsScience2019	4832	F	41.96	13.54
Bronze Age/Iron Age*	I1979	I1979	Italy_North_BellBeaker_1	OlaldeNature2018	4015	F	44.8	10.3333
Bronze Age/Iron Age*	I2477	I2477	Italy_North_BellBeaker_2	OlaldeNature2018	4015	F	44.8	10.3333
Bronze Age/Iron Age*	I2478	I2478	Italy_North_BellBeaker_3	OlaldeNature2018	4006	M	44.78	10.29
Bronze Age/Iron Age*	RISE486	RISE486.SG	Italy_North_Remedello_EBA.SG	AllentoftNature2015	3902	M	45.26	10.379
Bronze Age/Iron Age*	I15941	I15941	Italy_Sardinia_C	FernandesNatureEcologyEvolution2020	4196	M	40.6267	8.32306
Bronze Age/Iron Age*	I15942	I15942	Italy_Sardinia_C	FernandesNatureEcologyEvolution2020	4297	M	40.6267	8.32306
Bronze Age/Iron Age*	I16164	I16164	Italy_Sardinia_C	FernandesNatureEcologyEvolution2020	4415	M	40.4106	8.63972
Bronze Age/Iron Age*	I16169	I16169	Italy_Sardinia_C	FernandesNatureEcologyEvolution2020	4177	F	40.6267	8.32306
Bronze Age/Iron Age*	SID006	SID006	Italy_Sardinia_C	MarcusNatureCommunications2020	4663	M	40.624	8.63669
Bronze Age/Iron Age*	R22	R22.SG	Italy_Sardinia_C_BA.SG	AntonioGaoMootsScience2019	3868	F	40.8101	8.44221
Bronze Age/Iron Age*	R27	R27.SG	Italy_Sardinia_C_BA.SG	AntonioGaoMootsScience2019	4150	M	40.8101	8.44221
Bronze Age/Iron Age*	R29	R29.SG	Italy_Sardinia_C_BA.SG	AntonioGaoMootsScience2019	4150	M	40.8101	8.44221
Bronze Age/Iron Age*	I14675	I14675	Italy_Sardinia_C_MonteClaro	FernandesNatureEcologyEvolution2020	4021	M	40.7897	8.59139
Bronze Age/Iron Age*	I14677	I14677	Italy_Sardinia_C_MonteClaro	FernandesNatureEcologyEvolution2020	4329	M	40.7897	8.59139
Bronze Age/Iron Age*	I14678	I14678	Italy_Sardinia_C_MonteClaro	FernandesNatureEcologyEvolution2020	4247	M	40.7897	8.59139
Bronze Age/Iron Age*	I14676	I14676_published	Italy_Sardinia_C_MonteClaro_published	FernandesNatureEcologyEvolution2020	4053	M	40.7897	8.59139
Bronze Age/Iron Age*	I3743	I3743	Italy_Sardinia_EBA	FernandesNatureEcologyEvolution2020	3985	M	39.8666	9.23335
Bronze Age/Iron Age*	JK2716	SUA002	Italy_Sardinia_EBA	MarcusNatureCommunications2020	4076	M	39.87	9.2356
Bronze Age/Iron Age*	PJU002	PJU002	Italy_Sardinia_EBA	MarcusNatureCommunications2020	4145	F	40.0667	8.60056
Bronze Age/Iron Age*	SUA005	SUA005	Italy_Sardinia_EBA	MarcusNatureCommunications2020	4170	F	39.87	9.2356
Bronze Age/Iron Age*	SUA007	SUA007	Italy_Sardinia_EBA	MarcusNatureCommunications2020	3904	M	39.87	9.2356
Bronze Age/Iron Age*	SUC001	SUC001	Italy_Sardinia_EBA	MarcusNatureCommunications2020	4020	F	40.8103	8.44418
Bronze Age/Iron Age*	SUC003	SUC003	Italy_Sardinia_EBA	MarcusNatureCommunications2020	3963	M	40.8103	8.44418
Bronze Age/Iron Age*	SUC004	R28.SG	Italy_Sardinia_EBA	MarcusNatureCommunications2020	4185	F	40.8101	8.44221
Bronze Age/Iron Age*	SUC005	SUC005	Italy_Sardinia_EBA	MarcusNatureCommunications2020	4146	M	40.8103	8.44418
Bronze Age/Iron Age*	SUC006	R26.SG	Italy_Sardinia_EBA	MarcusNatureCommunications2020	4347	M	40.8101	8.44221
Bronze Age/Iron Age*	SUC007	SUC007	Italy_Sardinia_EBA	MarcusNatureCommunications2020	4321	M	40.8103	8.44418
Bronze Age/Iron Age*	ISC001	ISC001	Italy_Sardinia_EBA_Nuragic	MarcusNatureCommunications2020	4175	M	40.6634	8.53865
Bronze Age/Iron Age*	I18967	SEC005	Italy_Sardinia_LateC	MarcusNatureCommunications2020	4348	F	40.7862	8.59581
Bronze Age/Iron Age*	I18968	SEC002	Italy_Sardinia_LateC	MarcusNatureCommunications2020	4352	M	40.7862	8.59581
Bronze Age/Iron Age*	I18970	SEC001	Italy_Sardinia_LateC	MarcusNatureCommunications2020	4237	M	40.7862	8.59581
Bronze Age/Iron Age*	SEC004	SEC004	Italy_Sardinia_LateC	MarcusNatureCommunications2020	4337	F	40.7862	8.59581
Bronze Age/Iron Age*	SEC006	SEC006	Italy_Sardinia_LateC	MarcusNatureCommunications2020	4331	F	40.7862	8.59581
Bronze Age/Iron Age*	I4936	I4936_published	Italy_Sicily_BellBeaker_published	FernandesNatureEcologyEvolution2020 (higher coverage version of sample first reported in OlaldeNature2018)	4150	F	37.735	12.9619
Bronze Age/Iron Age*	I11442	I11442	Italy_Sicily_EBA	FernandesNatureEcologyEvolution2020	4120	M	37.908	13.478
Bronze Age/Iron Age*	I3122	I3122	Italy_Sicily_EBA	FernandesNatureEcologyEvolution2020	4073	F	37.908	13.478
Bronze Age/Iron Age*	I3123	I3123	Italy_Sicily_EBA	FernandesNatureEcologyEvolution2020	4121	M	37.908	13.478
Bronze Age/Iron Age*	I3124	I3124	Italy_Sicily_EBA	FernandesNatureEcologyEvolution2020	3824	M	37.908	13.478
Bronze Age/Iron Age*	I4383	I4383	Italy_Sicily_EBA	FernandesNatureEcologyEvolution2020	3950	F	37.8724	13.9346
Bronze Age/Iron Age*	I7800	I7800	Italy_Sicily_EBA	FernandesNatureEcologyEvolution2020	3945	F	36.8831	14.5712
Bronze Age/Iron Age*	I7805	I7805	Italy_Sicily_EBA	FernandesNatureEcologyEvolution2020	3860	F	36.8831	14.5712
Bronze Age/Iron Age*	I7807	I7807	Italy_Sicily_EBA	FernandesNatureEcologyEvolution2020	4038	F	36.8831	14.5712
Bronze Age/Iron Age*	I4068	I4068	Netherlands_BellBeaker	OlaldeNature2018	3985	M	52.7336	5.09618
Bronze Age/Iron Age*	I4069	I4069	Netherlands_BellBeaker	OlaldeNature2018	3966	M	52.7336	5.09618
Bronze Age/Iron Age*	I4073	I4073	Netherlands_BellBeaker	OlaldeNature2018	3992	M	52.7336	5.09618
Bronze Age/Iron Age*	I4074	I4074	Netherlands_BellBeaker	OlaldeNature2018	4030	M	52.7336	5.09618
Bronze Age/Iron Age*	I4075	I4075	Netherlands_BellBeaker	OlaldeNature2018	3950	F	52.7336	5.09618
Bronze Age/Iron Age*	I5748	I5748	Netherlands_BellBeaker	OlaldeNature2018	4383	M	52.7336	5.09618
Bronze Age/Iron Age*	I5750	I5750	Netherlands_BellBeaker	OlaldeNature2018	4050	M	52.7336	5.09618
Bronze Age/Iron Age*	I4253	I4253	Poland_BellBeaker	OlaldeNature2018	4266	M	50.649	20.656
Bronze Age/Iron Age*	I6534	I6534	Poland_BellBeaker	OlaldeNature2018	4237	M	50.09	18.1
Bronze Age/Iron Age*	I6538	I6538	Poland_BellBeaker	OlaldeNature2018	3823	F	50.91	16.79
Bronze Age/Iron Age*	I6582	I6582	Poland_BellBeaker	OlaldeNature2018	4171	F	50.09	18.1
Bronze Age/Iron Age*	I6583	I6583	Poland_BellBeaker	OlaldeNature2018	4138	F	50.96	17.02
Bronze Age/Iron Age*	I4251	I4251_published	Poland_BellBeaker_published	OlaldeNature2018	4219	M	50.649	20.656
Bronze Age/Iron Age*	I4252	I4252_published	Poland_BellBeaker_published	OlaldeNature2018	4155	M	50.649	20.656
Bronze Age/Iron Age*	I6531	I6531	Poland_ChopiceVeseleCulture	OlaldeNature2018	4113	M	50.23	18.22
Bronze Age/Iron Age*	I6537	I6537	Poland_ChopiceVeseleCulture	OlaldeNature2018	4130	M	50.11	18.21
Bronze Age/Iron Age*	RISE431	RISE431.SG	Poland_CordedWare_ProtoUnetice.SG	AllentoftNature2015	4125	M	52.143	16.538
Bronze Age/Iron Age*	N47	N47.SG	Poland_CWC_1.SG	FernandesScientificReports2018	4375	M	52.62	18.96
Bronze Age/Iron Age*	N49	N49.SG	Poland_CWC_1.SG	FernandesScientificReports2018	4375	M	52.62	18.96
Bronze Age/Iron Age*	N44	N44.SG	Poland_CWC_3.SG	FernandesScientificReports2018	4400	F	52.62	18.96
Bronze Age/Iron Age*	N45	N45.SG	Poland_CWC_3.SG	FernandesScientificReports2018	4375	F	52.62	18.96
Bronze Age/Iron Age*	RISE1	RISE1.SG	Poland_CWC_3.SG	AllentoftNature2015	4663	M	52.29	17.54
Bronze Age/Iron Age*	poz44	poz44.SG	Poland_CWC.SG	MalmstromProcBiolSci2019	4663	F	52.3	17.55
Bronze Age/Iron Age*	poz81	poz81.SG	Poland_CWC.SG	MalmstromProcBiolSci2019	4702	M	52.3	17.55
Bronze Age/Iron Age*	I6579	I6579	Poland_EBA	OlaldeNature2018	4155	F	51.04	17.07
Bronze Age/Iron Age*	RISE109	RISE109.SG	Poland_EBA_Unetice.SG	AllentoftNature2015	3821	F	50.98	17.068
Bronze Age/Iron Age*	RISE139	RISE139.SG	Poland_EBA_Unetice.SG	AllentoftNature2015	3970	M	50.796	17.094
Bronze Age/Iron Age*	RISE145	RISE145.SG	Poland_EBA_Unetice.SG	AllentoftNature2015	4015	F	50.913	17.177
Bronze Age/Iron Age*	N17	N17.SG	Poland_EBA.SG	FernandesScientificReports2018	3850	M	52.66	18.88
Bronze Age/Iron Age*	N38	N38.SG	Poland_GAC.SG	FernandesScientificReports2018	4959	F	52.61	18.9
Bronze Age/Iron Age*	I2403	I2403	Poland_Globular_Amphora	MathiesonNature2018	4667	M	52.85	17.8833
Bronze Age/Iron Age*	I2433	I2433	Poland_Globular_Amphora	MathiesonNature2018	4950	F	52.85	17.8833
Bronze Age/Iron Age*	I2440	I2440	Poland_Globular_Amphora	MathiesonNature2018	4950	M	52.85	17.8833
Bronze Age/Iron Age*	RISE1159	RISE1159.SG	Poland_Koszyce_GAC.SG	SchroederPNAS2019	4724	F	50.1701	20.579
Bronze Age/Iron Age*	RISE1161	RISE1161.SG	Poland_Koszyce_GAC.SG	SchroederPNAS2019	4785	F	50.1701	20.579
Bronze Age/Iron Age*	RISE1163	RISE1163.SG	Poland_Koszyce_GAC.SG	SchroederPNAS2019	4736	M	50.1701	20.579
Bronze Age/Iron Age*	RISE1165	RISE1165.SG	Poland_Koszyce_GAC.SG	SchroederPNAS2019	4754	M	50.1701	20.579
Bronze Age/Iron Age*	RISE1166	RISE1166.SG	Poland_Koszyce_GAC.SG	SchroederPNAS2019	4904	F	50.1701	20.579
Bronze Age/Iron Age*	RISE1170	RISE1170.SG	Poland_Koszyce_GAC.SG	SchroederPNAS2019	4754	F	50.1701	20.579
Bronze Age/Iron Age*	RISE1246	RISE1246.SG	Poland_Ksiaznice_GAC.SG	SchroederPNAS2019	4721	F	50.2	21.4
Bronze Age/Iron Age*	RISE1248	RISE1248.SG	Poland_Ksiaznice_GAC.SG	SchroederPNAS2019	4725	F	50.2	21.4
Bronze Age/Iron Age*	RISE1249	RISE1249.SG	Poland_Ksiaznice_GAC.SG	SchroederPNAS2019	4737	F	50.2	21.4
Bronze Age/Iron Age*	RISE1252	RISE1252.SG	Poland_Mierzanowice_GAC.SG	SchroederPNAS2019	4725	M	50.8	21.5
Bronze Age/Iron Age*	RISE1241	RISE1241.SG	Poland_Sandomierz_GAC.SG	SchroederPNAS2019	4773	M	50.6	21.7
Bronze Age/Iron Age*	RISE1250	RISE1250.SG	Poland_Sandomierz_GAC.SG	SchroederPNAS2019	4750	M	50.6	21.7
Bronze Age/Iron Age*	pcw260	pcw260.SG	Poland_Southeast_BellBeaker.SG	LinderholmNatureScientificReports2020	4237	F	50.3561	20.5714
Bronze Age/Iron Age*	pcw270	pcw270.SG	Poland_Southeast_BellBeaker.SG	LinderholmNatureScientificReports2020	4250	F	50.3561	20.5714
Bronze Age/Iron Age*	pcw280	pcw280.SG	Poland_Southeast_BellBeaker.SG	LinderholmNatureScientificReports2020	4250	F	50.3561	20.5714
Bronze Age/Iron Age*	pcw191	pcw191.SG	Poland_Southeast_CordedWare_MC.SG	LinderholmNatureScientificReports2020	4237	F	49.9336	22.8189
Bronze Age/Iron Age*	pcw040	pcw040.SG	Poland_Southeast_CordedWare.SG	LinderholmNatureScientificReports2020	4400	M	49.9161	22.8608
Bronze Age/Iron Age*	pcw061	pcw061.SG	Poland_Southeast_CordedWare.SG	LinderholmNatureScientificReports2020	4321	F	49.9161	22.8608
Bronze Age/Iron Age*	pcw070	pcw070.SG	Poland_Southeast_CordedWare.SG	LinderholmNatureScientificReports2020	4321	M	49.9161	22.8608
Bronze Age/Iron Age*	pcw110	pcw110.SG	Poland_Southeast_CordedWare.SG	LinderholmNatureScientificReports2020	4300	M	50.0119	22.5942
Bronze Age/Iron Age*	pcw160	pcw160.SG	Poland_Southeast_CordedWare.SG	LinderholmNatureScientificReports2020	4299	M	50.0444	22.5714
Bronze Age/Iron Age*	pcw211	pcw211.SG	Poland_Southeast_CordedWare.SG	LinderholmNatureScientificReports2020	4300	F	49.9572	22.6603
Bronze Age/Iron Age*	pcw212	pcw212.SG	Poland_Southeast_CordedWare.SG	LinderholmNatureScientificReports2020	4460	F	49.9572	22.6603
Bronze Age/Iron Age*	pcw250	pcw250.SG	Poland_Southeast_CordedWare.SG	LinderholmNatureScientificReports2020	4300	M	50.1044	20.0114
Bronze Age/Iron Age*	pcw350	pcw350.SG	Poland_Southeast_CordedWare.SG	LinderholmNatureScientificReports2020	4293	M	50.4561	23.6619
Bronze Age/Iron Age*	pcw361	pcw361.SG	Poland_Southeast_CordedWare.SG	LinderholmNatureScientificReports2020	4300	M	50.4561	23.6619
Bronze Age/Iron Age*	pcw362	pcw362.SG	Poland_Southeast_CordedWare.SG	LinderholmNatureScientificReports2020	4305	M	50.4561	23.6619
Bronze Age/Iron Age*	pcw420	pcw420.SG	Poland_Southeast_CordedWare.SG	LinderholmNatureScientificReports2020	4300	M	50.1853	20.2992
Bronze Age/Iron Age*	pcw430	pcw430.SG	Poland_Southeast_CordedWare.SG	LinderholmNatureScientificReports2020	4300	M	50.1236	19.9931
Bronze Age/Iron Age*	RISE1254	RISE1254.SG	Poland_Wilczyce_GAC.SG	SchroederPNAS2019	4725	M	51.1	17.1
Bronze Age/Iron Age*	I0839	I0839	Portugal_C	OlaldeScience2019 (supplement of OlaldeNature2018)	4264	F	39.5	-8.61667
Bronze Age/Iron Age*	I0840	I0840	Portugal_C	OlaldeNature2018	4243	F	39.5	-8.61667
Bronze Age/Iron Age*	I11592	I11592	Portugal_C	OlaldeScience2019	4650	M	39.0833	9.26667
Bronze Age/Iron Age*	I11604	I11604	Portugal_C	OlaldeScience2019	4750	M	39.2333	-9.3
Bronze Age/Iron Age*	I11605	I11605	Portugal_C	OlaldeScience2019	4750	M	39.2333	-9.3
Bronze Age/Iron Age*	I11614	I11614	Portugal_C	OlaldeScience2019	4650	F	39.0833	9.26667
Bronze Age/Iron Age*	I1970	I1970	Portugal_C	OlaldeNature2018	4635	M	38.875	-9.075
Bronze Age/Iron Age*	I3432	I3432	Portugal_C	OlaldeScience2019	4924	F	38.387	-7.55
Bronze Age/Iron Age*	I5429	I5429	Portugal_C	OlaldeScience2019	4866	M	38.387	-7.55
Bronze Age/Iron Age*	I6601	I6601	Portugal_C	OlaldeNature2018	4650	M	39.09	-9.29
Bronze Age/Iron Age*	I6467	I6467	Portugal_C_lc	OlaldeNature2018	4450	F	38.875	-9.075
Bronze Age/Iron Age*	I7691	I7691	Portugal_EBA	OlaldeScience2019	3900	M	39.6686	-8.1303
Bronze Age/Iron Age*	I7692	I7692	Portugal_EBA	OlaldeScience2019	3900	F	39.6686	-8.1303
Bronze Age/Iron Age*	I7689	I7689	Portugal_EBA_lc	OlaldeScience2019	3900	F	39.6686	-8.1303
Bronze Age/Iron Age*	I4229	I4229	Portugal_LN_C	OlaldeNature2018	4158	M	38.745	-9.21522
Bronze Age/Iron Age*	CovaMoura364	CovaMoura364.SG	Portugal_LN_C.SG	MartinianoPLoSGenetics2017	4200	M	38.745	-9.21522
Bronze Age/Iron Age*	CovaMoura9B	CovaMoura9B.SG	Portugal_LN_C.SG	MartinianoPLoSGenetics2017	4200	F	38.745	-9.21522
Bronze Age/Iron Age*	LD270	LD270.SG	Portugal_MN.SG	GonzalesFortesProcRoyalSocB2019	4380	U	41.7083	-6.92778
Bronze Age/Iron Age*	LU339	LU339.SG	Portugal_MN.SG	GonzalesFortesProcRoyalSocB2019	4849	U	41.7083	-6.92778
Bronze Age/Iron Age*	I5367	I5367	Scotland_BellBeaker	OlaldeNature2018	4312	F	56.6809	-6.45982
Bronze Age/Iron Age*	I5385	I5385	Scotland_BellBeaker	OlaldeNature2018	4230	F	58.3648	-3.40351
Bronze Age/Iron Age*	I2567	I2567	Scotland_C_EBA	OlaldeNature2018	4018	M	55.97	-2.444
Bronze Age/Iron Age*	I3132	I3132	Scotland_C_EBA	OlaldeNature2018	3927	M	57.721	-3.3881
Bronze Age/Iron Age*	I5515	I5515	Scotland_C_EBA	OlaldeNature2018	3882	M	56.062	-3.41918
Bronze Age/Iron Age*	I2568	I2568	Scotland_C_EBA_mediumhighEEF	OlaldeNature2018	4113	M	55.97	-2.444
Bronze Age/Iron Age*	I2569	I2569_published	Scotland_C_EBA_published	OlaldeNature2018	3978	M	55.99	-2.537
Bronze Age/Iron Age*	I2630	I2630	Scotland_N	OlaldeNature2018	4471	M	58.74	-2.916
Bronze Age/Iron Age*	I2631	I2631	Scotland_N	OlaldeNature2018	4957	M	59.23	-2.568
Bronze Age/Iron Age*	I2932	I2932	Scotland_N	OlaldeNature2018	4433	M	58.74	-2.916
Bronze Age/Iron Age*	I2933	I2933	Scotland_N	OlaldeNature2018	4877	M	58.74	-2.916
Bronze Age/Iron Age*	I2977	I2977	Scotland_N	OlaldeNature2018	4843	M	58.74	-2.916
Bronze Age/Iron Age*	I3138	I3138	Scotland_N	OlaldeNature2018	4998	F	56.4033	-5.47806
Bronze Age/Iron Age*	I2629	I2629_published	Scotland_N_published	OlaldeNature2018	4800	M	58.74	-2.916
Bronze Age/Iron Age*	I0257	I0257	Spain_C	OlaldeNature2018	4439	M	41.4919	2.13889
Bronze Age/Iron Age*	I0258	I0258	Spain_C	OlaldeNature2018	4500	F	41.4919	2.13889
Bronze Age/Iron Age*	I0260	I0260	Spain_C	OlaldeNature2018	4500	F	41.4919	2.13889
Bronze Age/Iron Age*	I0261	I0261	Spain_C	OlaldeNature2018	4500	M	41.4919	2.13889
Bronze Age/Iron Age*	I0262	I0262	Spain_C	OlaldeNature2018	4500	F	41.4919	2.13889
Bronze Age/Iron Age*	I0263	I0263	Spain_C	OlaldeNature2018	4500	F	41.4919	2.13889
Bronze Age/Iron Age*	I0455	I0455	Spain_C	OlaldeNature2018	4737	M	38.1	-1.85
Bronze Age/Iron Age*	I0457	I0457	Spain_C	OlaldeNature2018	4500	M	38.1	-1.85
Bronze Age/Iron Age*	I0459	I0459	Spain_C	OlaldeNature2018	4350	F	42.4	-3.75
Bronze Age/Iron Age*	I0460	I0460	Spain_C	OlaldeNature2018	4287	M	42.4	-3.75
Bronze Age/Iron Age*	I0823	I0823	Spain_C	OlaldeNature2018	4500	F	41.4919	2.13889
Bronze Age/Iron Age*	I0825	I0825	Spain_C	OlaldeNature2018	4346	M	41.4919	2.13889
Bronze Age/Iron Age*	I0826	I0826	Spain_C	OlaldeNature2018	4522	M	41.4919	2.13889
Bronze Age/Iron Age*	I1271	I1271	Spain_C	MathiesonNature2015	4550	F	42.3333	-3.5
Bronze Age/Iron Age*	I1272	I1272	Spain_C	MathiesonNature2015	4595	F	42.3333	-3.5
Bronze Age/Iron Age*	I1276	I1276	Spain_C	MathiesonNature2015	4550	F	42.3333	-3.5
Bronze Age/Iron Age*	I1277	I1277	Spain_C	MathiesonNature2015	4403	M	42.3333	-3.5
Bronze Age/Iron Age*	I1280	I1280	Spain_C	MathiesonNature2015	4550	F	42.3333	-3.5
Bronze Age/Iron Age*	I1281	I1281	Spain_C	MathiesonNature2015	4653	F	42.3333	-3.5
Bronze Age/Iron Age*	I1282	I1282	Spain_C	MathiesonNature2015	4550	M	42.3333	-3.5
Bronze Age/Iron Age*	I1284	I1284	Spain_C	MathiesonNature2015	4550	M	42.3333	-3.5
Bronze Age/Iron Age*	I1300	I1300	Spain_C	MathiesonNature2015	4550	F	42.3333	-3.5
Bronze Age/Iron Age*	I1303	I1303	Spain_C	MathiesonNature2015	4550	M	42.3333	-3.5
Bronze Age/Iron Age*	I1314	I1314	Spain_C	MathiesonNature2015	4550	M	42.3333	-3.5
Bronze Age/Iron Age*	I1553	I1553	Spain_C	OlaldeNature2018	4500	F	41.4919	2.13889
Bronze Age/Iron Age*	I1842	I1842	Spain_C	OlaldeScience2019	4850	M	42.63	-2.7
Bronze Age/Iron Age*	I1843	I1843	Spain_C	LipsonNature2017	4904	F	42.57	-2.57
Bronze Age/Iron Age*	I1845	I1845	Spain_C	OlaldeScience2019	4825	M	42.57	-2.57
Bronze Age/Iron Age*	I1846	I1846	Spain_C	OlaldeScience2019	4825	F	42.57	-2.57
Bronze Age/Iron Age*	I1975	I1975	Spain_C	LipsonNature2017	4927	M	42.57	-2.55
Bronze Age/Iron Age*	I1976	I1976	Spain_C	OlaldeScience2019 (supplement of LipsonNature2017)	4427	M	42.57	-2.62
Bronze Age/Iron Age*	I1978	I1978	Spain_C	OlaldeScience2019	4825	F	42.57	-2.57
Bronze Age/Iron Age*	I1981	I1981	Spain_C	LipsonNature2017	4891	F	42.57	-2.57
Bronze Age/Iron Age*	I2467	I2467	Spain_C	LipsonNature2017	4327	M	42.57	-2.62
Bronze Age/Iron Age*	I2473	I2473	Spain_C	OlaldeScience2019 (supplement of LipsonNature2017)	4811	M	42.57	-2.62
Bronze Age/Iron Age*	I3269	I3269	Spain_C	LipsonNature2017	4850	M	42.63	-2.7
Bronze Age/Iron Age*	I3270	I3270	Spain_C	LipsonNature2017	4850	F	42.63	-2.7
Bronze Age/Iron Age*	I3271	I3271	Spain_C	LipsonNature2017	4850	F	42.63	-2.7
Bronze Age/Iron Age*	I3272	I3272	Spain_C	LipsonNature2017	4959	M	42.57	-2.55
Bronze Age/Iron Age*	I3277	I3277	Spain_C	OlaldeScience2019 (supplement of LipsonNature2017)	4950	F	42.57	-2.57
Bronze Age/Iron Age*	I4245	I4245	Spain_C	OlaldeNature2018	4316	F	40.426	-3.535
Bronze Age/Iron Age*	I4247	I4247	Spain_C	OlaldeNature2018	4302	F	40.426	-3.535
Bronze Age/Iron Age*	I4565	I4565	Spain_C	OlaldeScience2019	4915	M	41.2916	1.0638
Bronze Age/Iron Age*	I5838	I5838	Spain_C	LipsonNature2017	4550	M	42.3333	-3.5
Bronze Age/Iron Age*	I6475	I6475	Spain_C	OlaldeNature2018	4200	F	40.4903	-3.37389
Bronze Age/Iron Age*	I6543	I6543	Spain_C	OlaldeNature2018	4100	M	40.439	-3.501
Bronze Age/Iron Age*	I6584	I6584	Spain_C	OlaldeNature2018	4200	F	40.22	-3.76
Bronze Age/Iron Age*	I6587	I6587	Spain_C	OlaldeNature2018	4200	M	40.22	-3.76
Bronze Age/Iron Age*	I6604	I6604	Spain_C	OlaldeNature2018	3947	M	40.439	-3.501
Bronze Age/Iron Age*	I6609	I6609	Spain_C	OlaldeNature2018	4100	F	40.439	-3.501
Bronze Age/Iron Age*	I6612	I6612	Spain_C	OlaldeNature2018	4100	F	40.439	-3.501
Bronze Age/Iron Age*	I6617	I6617	Spain_C	OlaldeNature2018	4550	M	40.22	-3.76
Bronze Age/Iron Age*	I6622	I6622	Spain_C	OlaldeScience2019	4100	M	40.439	-3.501
Bronze Age/Iron Age*	I6628	I6628	Spain_C	OlaldeNature2018	4550	F	40.22	-3.76
Bronze Age/Iron Age*	I6629	I6629	Spain_C	OlaldeNature2018	4550	M	40.22	-3.76
Bronze Age/Iron Age*	I6630	I6630	Spain_C	OlaldeNature2018	4550	F	40.22	-3.76
Bronze Age/Iron Age*	I7587	I7587	Spain_C	OlaldeScience2019	4650	M	37.24	-4.24
Bronze Age/Iron Age*	I8048	I8048	Spain_C	OlaldeScience2019	4050	M	37.005	-3.8947
Bronze Age/Iron Age*	I8148	I8148	Spain_C	OlaldeScience2019	4650	M	37.24	-4.24
Bronze Age/Iron Age*	I8149	I8149	Spain_C	OlaldeScience2019	4650	F	37.24	-4.24
Bronze Age/Iron Age*	I8153	I8153	Spain_C	OlaldeScience2019	4650	M	37.24	-4.24
Bronze Age/Iron Age*	I8154	I8154	Spain_C	OlaldeScience2019	4650	F	37.24	-4.24
Bronze Age/Iron Age*	I8156	I8156	Spain_C	OlaldeScience2019	4650	M	37.24	-4.24
Bronze Age/Iron Age*	I8158	I8158	Spain_C	OlaldeScience2019	4650	M	37.24	-4.24
Bronze Age/Iron Age*	I6605	I6605	Spain_C_lc	OlaldeNature2018	4335	F	40.439	-3.501
Bronze Age/Iron Age*	I6613	I6613	Spain_C_lc	OlaldeNature2018	4100	F	40.439	-3.501
Bronze Age/Iron Age*	I0581	I0581_published_d	Spain_C_published	MathiesonNature2015	4746	M	42.3333	-3.5
Bronze Age/Iron Age*	I3276	I3276_published	Spain_C_published	LipsonNature2017	4955	M	42.57	-2.57
Bronze Age/Iron Age*	I6542	I6542_published	Spain_C_published	OlaldeNature2018	4100	M	40.439	-3.501
Bronze Age/Iron Age*	I6596	I6596_published	Spain_C_published	OlaldeNature2018	4550	M	40.22	-3.76
Bronze Age/Iron Age*	I6608	I6608_published	Spain_C_published	OlaldeNature2018	3840	M	40.439	-3.501
Bronze Age/Iron Age*	I8140	I8140_published_d	Spain_C_published	OlaldeScience2019	3895	F	37.1366	-3.5483
Bronze Age/Iron Age*	atp016	atp016.SG	Spain_C.SG	ValdioseraPNAS2018	4971	F	42.3527	-3.51832
Bronze Age/Iron Age*	atp12-1420	atp12-1420.SG	Spain_C.SG	ValdioseraPNAS2018	4868	M	42.3527	-3.51832
Bronze Age/Iron Age*	ATP17	ATP17.SG	Spain_C.SG	GuntherPNAS2015	4849	M	42.3525	-3.51833
Bronze Age/Iron Age*	ATP20	ATP20.SG	Spain_C.SG	GuntherPNAS2015	4138	F	42.3525	-3.51833
Bronze Age/Iron Age*	por004	por004.SG	Spain_C.SG	ValdioseraPNAS2018	4955	M	42.3527	-3.51832
Bronze Age/Iron Age*	I3484	I3484	Spain_EBA	OlaldeScience2019	4074	M	38.5781	-2.8417
Bronze Age/Iron Age*	I3485	I3485	Spain_EBA	OlaldeScience2019	4050	F	38.5781	-2.8417
Bronze Age/Iron Age*	I3756	I3756	Spain_EBA	OlaldeScience2019	3860	M	38.5781	-2.8417
Bronze Age/Iron Age*	I4329	I4329	Spain_EBA_Mallorca	FernandesNatureEcologyEvolution2020	4333	F	39.505	3.30198
Bronze Age/Iron Age*	I10284	I10284	Spain_MLN	OlaldeScience2019	4900	M	41.4391	1.5733
Bronze Age/Iron Age*	I10286	I10286	Spain_MLN	OlaldeScience2019	4900	M	41.4391	1.5733
Bronze Age/Iron Age*	I11303	I11303	Spain_MLN	OlaldeScience2019	4900	F	41.4391	1.5733
Bronze Age/Iron Age*	I11305	I11305	Spain_MLN	OlaldeScience2019	4900	M	41.4391	1.5733
Bronze Age/Iron Age*	I7642	I7642	Spain_MLN	OlaldeScience2019	4809	M	38.7025	-0.48631
Bronze Age/Iron Age*	I11304	I11304_published	Spain_MLN_published	OlaldeScience2019	4900	M	41.4391	1.5733
Bronze Age/Iron Age*	LD1174	LD1174.SG	Spain_MN.SG	GonzalesFortesProcRoyalSocB2019	4466	F	37.4061	-4.41639
Bronze Age/Iron Age*	I0453	I0453	Spain_SE_Iberia_CA_published	OlaldeNature2018	4239	M	38.1	-1.85
Bronze Age/Iron Age*	ans016	ans016.SG	Sweden_Ansarve_Megalithic.SG	SanchezQuintoPNAS2019	4705	M	57.509	18.14
Bronze Age/Iron Age*	ber1	ber1M.SG	Sweden_BAC.SG	MalmstromProcBiolSci2019	4483	M	58.4158	15.6253
Bronze Age/Iron Age*	ber2	ber2F.SG	Sweden_BAC.SG	MalmstromProcBiolSci2019	4492	F	58.4158	15.6253
Bronze Age/Iron Age*	oll007	oll007.SG	Sweden_BAC.SG	MalmstromProcBiolSci2019	4617	F	56.0147	14.068
Bronze Age/Iron Age*	RISE94	RISE94.SG	Sweden_BattleAxe.SG	AllentoftNature2015	4487	M	56.025	14.233
Bronze Age/Iron Age*	ros005	ros005_renamed.SG	Sweden_FBC.SG	MalmstromProcBiolSci2019	4955	M	58.1833	13.65
Bronze Age/Iron Age*	ajv28	ajv28.minus.SG	Sweden_Gotland_Ajvide_PittedWare_BattleAxe.SG	CoutinhoJakobssonAJPA2020	4829	F	57.28	18.2
Bronze Age/Iron Age*	ajv36	ajv36.minus.SG	Sweden_Gotland_Ajvide_PittedWare_BattleAxe.SG	CoutinhoJakobssonAJPA2020	4924	F	57.28	18.2
Bronze Age/Iron Age*	hem001	hem001.SG	Sweden_Gotland_Hemmor_PittedWare_BattleAxe.SG	CoutinhoJakobssonAJPA2020	4929	M	57.22	18.57
Bronze Age/Iron Age*	hem004	hem004.SG	Sweden_Gotland_Hemmor_PittedWare_BattleAxe.SG	CoutinhoJakobssonAJPA2020	5145	M	57.22	18.57
Bronze Age/Iron Age*	hem005	hem005.SG	Sweden_Gotland_Hemmor_PittedWare_BattleAxe.SG	CoutinhoJakobssonAJPA2020	5178	F	57.22	18.57
Bronze Age/Iron Age*	vbj001	vbj001.SG	Sweden_Gotland_Vasterbjers_PittedWare_BattleAxe_minus.SG	CoutinhoJakobssonAJPA2020	4675	F	57.58	18.7
Bronze Age/Iron Age*	vbj002	vbj002.SG	Sweden_Gotland_Vasterbjers_PittedWare_BattleAxe_minus.SG	CoutinhoJakobssonAJPA2020	4780	F	57.58	18.7
Bronze Age/Iron Age*	vbj004	vbj004.SG	Sweden_Gotland_Vasterbjers_PittedWare_BattleAxe_minus.SG	CoutinhoJakobssonAJPA2020	4702	F	57.58	18.7
Bronze Age/Iron Age*	vbj006	vbj006.SG	Sweden_Gotland_Vasterbjers_PittedWare_BattleAxe_minus.SG	CoutinhoJakobssonAJPA2020	4898	M	57.58	18.7
Bronze Age/Iron Age*	vbj007	vbj007.SG	Sweden_Gotland_Vasterbjers_PittedWare_BattleAxe_minus.SG	CoutinhoJakobssonAJPA2020	4469	M	57.58	18.7
Bronze Age/Iron Age*	vbj008	vbj008.SG	Sweden_Gotland_Vasterbjers_PittedWare_BattleAxe_minus.SG	CoutinhoJakobssonAJPA2020	4663	M	57.58	18.7
Bronze Age/Iron Age*	vbj012	vbj012.SG	Sweden_Gotland_Vasterbjers_PittedWare_BattleAxe_minus.SG	CoutinhoJakobssonAJPA2020	4933	M	57.58	18.7
Bronze Age/Iron Age*	vbj013	vbj013.SG	Sweden_Gotland_Vasterbjers_PittedWare_BattleAxe_minus.SG	CoutinhoJakobssonAJPA2020	4778	M	57.58	18.7
Bronze Age/Iron Age*	vbj014	vbj014.SG	Sweden_Gotland_Vasterbjers_PittedWare_BattleAxe_minus.SG	CoutinhoJakobssonAJPA2020	4802	M	57.58	18.7
Bronze Age/Iron Age*	vbj015	vbj015.SG	Sweden_Gotland_Vasterbjers_PittedWare_BattleAxe_minus.SG	CoutinhoJakobssonAJPA2020	4865	M	57.58	18.7
Bronze Age/Iron Age*	vbj018	vbj018.SG	Sweden_Gotland_Vasterbjers_PittedWare_BattleAxe_minus.SG	CoutinhoJakobssonAJPA2020	4868	M	57.58	18.7
Bronze Age/Iron Age*	vbj017	vbj017.SG	Sweden_Gotland_Vasterbjers_PittedWare_BattleAxe.SG	CoutinhoJakobssonAJPA2020	4864	M	57.58	18.7
Bronze Age/Iron Age*	RISE179	RISE179.SG	Sweden_LN.SG	AllentoftNature2015	3843	M	55.397	13.6
Bronze Age/Iron Age*	RISE97	RISE97.SG	Sweden_LN.SG	AllentoftNature2015	3895	F	55.557	13.059
Bronze Age/Iron Age*	RISE98	RISE98.SG	Sweden_LN.SG	AllentoftNature2015	4082	M	55.381	13.445
Bronze Age/Iron Age*	ajv54	ajv54.SG	Sweden_PWC.SG	MalmstromProcBiolSci2019	4849	M	57.2811	18.1691
Bronze Age/Iron Age*	I5755	I5755	Switzerland_BellBeaker	OlaldeNature2018	4175	M	46.2317	7.35124
Bronze Age/Iron Age*	I5757	I5757	Switzerland_BellBeaker	OlaldeNature2018	4175	M	46.2317	7.35124
Bronze Age/Iron Age*	I5759	I5759	Switzerland_BellBeaker	OlaldeNature2018	4175	F	46.2317	7.35124
Bronze Age/Iron Age*	MX193	MX193	Switzerland_EBA_1	FurtwanglerNatureCommunications2020	4087	F	47.255	8.2158
Bronze Age/Iron Age*	RA54	RA54	Switzerland_EBA_1	FurtwanglerNatureCommunications2020	4498	F	47.1936	8.122
Bronze Age/Iron Age*	TU876(SX10)	TU876_SX10	Switzerland_EBA_1	FurtwanglerNatureCommunications2020	4550	F	47.2266	8.81844
Bronze Age/Iron Age*	TU904(SX17)	TU904_SX17	Switzerland_EBA_1	FurtwanglerNatureCommunications2020	4344	F	47.45	9.292
Bronze Age/Iron Age*	TU908(SX21)	TU908_SX21	Switzerland_EBA_1	FurtwanglerNatureCommunications2020	4327	F	47.45	9.292
Bronze Age/Iron Age*	TU910(SX22)	TU910_SX22	Switzerland_EBA_1	FurtwanglerNatureCommunications2020	4949	F	47.45	9.292
Bronze Age/Iron Age*	TU914(SX26)	TU914_SX26	Switzerland_EBA_1	FurtwanglerNatureCommunications2020	4322	F	47.45	9.292
Bronze Age/Iron Age*	MX188	MX188	Switzerland_EBA_2	FurtwanglerNatureCommunications2020	4399	M	47.255	8.2158
Bronze Age/Iron Age*	MX189	MX189	Switzerland_EBA_2	FurtwanglerNatureCommunications2020	4058	F	47.255	8.2158
Bronze Age/Iron Age*	MX191	MX191	Switzerland_EBA_2	FurtwanglerNatureCommunications2020	4523	M	47.255	8.2158
Bronze Age/Iron Age*	MX196	MX196	Switzerland_EBA_2	FurtwanglerNatureCommunications2020	4495	F	47.255	8.2158
Bronze Age/Iron Age*	MX197	MX197	Switzerland_EBA_2	FurtwanglerNatureCommunications2020	4351	F	47.255	8.2158
Bronze Age/Iron Age*	MX198	MX198	Switzerland_EBA_2	FurtwanglerNatureCommunications2020	4509	F	47.255	8.2158
Bronze Age/Iron Age*	MX199	MX199	Switzerland_EBA_2	FurtwanglerNatureCommunications2020	4235	F	47.255	8.2158
Bronze Age/Iron Age*	MX298	MX298	Switzerland_EBA_2	FurtwanglerNatureCommunications2020	4461	M	47.45	9.292
Bronze Age/Iron Age*	RA64	RA64	Switzerland_EBA_2	FurtwanglerNatureCommunications2020	4099	M	47.5878	8.29332
Bronze Age/Iron Age*	Aes1	Aes1	Switzerland_LN	FurtwanglerNatureCommunications2020	4939	M	47.4654	7.60169
Bronze Age/Iron Age*	Aes10	Aes10	Switzerland_LN	FurtwanglerNatureCommunications2020	4833	F	47.4654	7.60169
Bronze Age/Iron Age*	Aes13	Aes13	Switzerland_LN	FurtwanglerNatureCommunications2020	4902	M	47.4654	7.60169
Bronze Age/Iron Age*	Aes14	Aes14	Switzerland_LN	FurtwanglerNatureCommunications2020	4897	M	47.4654	7.60169
Bronze Age/Iron Age*	Aes16	Aes16	Switzerland_LN	FurtwanglerNatureCommunications2020	4942	F	47.4654	7.60169
Bronze Age/Iron Age*	Aes17	Aes17	Switzerland_LN	FurtwanglerNatureCommunications2020	4878	M	47.4654	7.60169
Bronze Age/Iron Age*	Aes18	Aes18	Switzerland_LN	FurtwanglerNatureCommunications2020	4838	F	47.4654	7.60169
Bronze Age/Iron Age*	Aes2	Aes2	Switzerland_LN	FurtwanglerNatureCommunications2020	4885	F	47.4654	7.60169
Bronze Age/Iron Age*	Aes20	Aes20	Switzerland_LN	FurtwanglerNatureCommunications2020	4842	M	47.4654	7.60169
Bronze Age/Iron Age*	Aes21	Aes21	Switzerland_LN	FurtwanglerNatureCommunications2020	4825	M	47.4654	7.60169
Bronze Age/Iron Age*	Aes22	Aes22	Switzerland_LN	FurtwanglerNatureCommunications2020	4740	M	47.4654	7.60169
Bronze Age/Iron Age*	Aes23	Aes23	Switzerland_LN	FurtwanglerNatureCommunications2020	4722	M	47.4654	7.60169
Bronze Age/Iron Age*	Aes24	Aes24	Switzerland_LN	FurtwanglerNatureCommunications2020	4839	M	47.4654	7.60169
Bronze Age/Iron Age*	Aes3	Aes3	Switzerland_LN	FurtwanglerNatureCommunications2020	4919	F	47.4654	7.60169
Bronze Age/Iron Age*	Aes4	Aes4	Switzerland_LN	FurtwanglerNatureCommunications2020	4970	M	47.4654	7.60169
Bronze Age/Iron Age*	Aes5	Aes5	Switzerland_LN	FurtwanglerNatureCommunications2020	4906	F	47.4654	7.60169
Bronze Age/Iron Age*	Aes6	Aes6_d	Switzerland_LN	FurtwanglerNatureCommunications2020	4799	M	47.4654	7.60169
Bronze Age/Iron Age*	Aes7	Aes7_d	Switzerland_LN	FurtwanglerNatureCommunications2020	4750	M	47.4654	7.60169
Bronze Age/Iron Age*	Aes8	Aes8	Switzerland_LN	FurtwanglerNatureCommunications2020	4851	F	47.4654	7.60169
Bronze Age/Iron Age*	Aes9	Aes9	Switzerland_LN	FurtwanglerNatureCommunications2020	4848	F	47.4654	7.60169
Bronze Age/Iron Age*	MX184	MX184	Switzerland_LN	FurtwanglerNatureCommunications2020	4950	F	47.2621	7.65984
Bronze Age/Iron Age*	MX203	MX203	Switzerland_LN	FurtwanglerNatureCommunications2020	4950	F	47.2621	7.65984
Bronze Age/Iron Age*	MX204	MX204	Switzerland_LN	FurtwanglerNatureCommunications2020	4950	M	47.2621	7.65984
Bronze Age/Iron Age*	MX209	MX209	Switzerland_LN	FurtwanglerNatureCommunications2020	4950	M	47.2621	7.65984
Bronze Age/Iron Age*	MX210	MX210	Switzerland_LN	FurtwanglerNatureCommunications2020	4950	M	47.2621	7.65984
Bronze Age/Iron Age*	MX211	MX211	Switzerland_LN	FurtwanglerNatureCommunications2020	4992	M	47.2621	7.65984
Bronze Age/Iron Age*	RA44	RA44	Switzerland_LN	FurtwanglerNatureCommunications2020	4828	F	47.2621	7.65984
Bronze Age/Iron Age*	RA45	RA45	Switzerland_LN	FurtwanglerNatureCommunications2020	4975	F	47.2621	7.65984
Bronze Age/Iron Age*	RA57	RA57	Switzerland_LN	FurtwanglerNatureCommunications2020	4806	F	47.3122	7.3843
Bronze Age/Iron Age*	RA58	RA58	Switzerland_LN	FurtwanglerNatureCommunications2020	4865	M	47.3122	7.3843
Bronze Age/Iron Age*	RA61	RA61	Switzerland_LN	FurtwanglerNatureCommunications2020	4804	M	47.3122	7.3843
Bronze Age/Iron Age*	RA62	RA62	Switzerland_LN	FurtwanglerNatureCommunications2020	4853	M	47.3122	7.3843
Bronze Age/Iron Age*	I5358	I5358	Wales_N	OlaldeNature2018	4918	F	53.0587	-3.24509
Bronze Age/Iron Age*	I5357	SB568A_lib.SG	Wales_N.SG	BraceDiekmannNatureEcologyEvolution2019	4776	F	53.1146	-4.13021
Hunter-Gatherers*	I6745	I6745	England_Mesolithic	BraceDiekmannNatureEcologyEvolution2019	10546	F	51.3247	-2.75325
Hunter-Gatherers*	I3025	I3025	England_Mesolithic_all.SG	BraceDiekmannNatureEcologyEvolution2019	9257	F	50.4682	-3.50307
Hunter-Gatherers*	I6767	I6767	England_Mesolithic_all.SG	BraceDiekmannNatureEcologyEvolution2019	10280	M	51.2817	-2.76575
Hunter-Gatherers*	BerryAuBac	BerryAuBac_published	France_BerryAuBac	MathiesonNature2018	7237	M	49.24	3.54
Hunter-Gatherers*	Chaudardes1	Chaudardes1_published_d	France_Chaudardes_published	FuNature2016	8218	M	49.24	3.46
Hunter-Gatherers*	Iboussieres25-1	Iboussieres25-1	France_Iboussieres25_1	MathiesonNature2018	11675	M	44.29	4.46
Hunter-Gatherers*	Iboussieres31-2	Iboussieres31-2	France_Iboussieres31_2	MathiesonNature2018	11675	M	44.29	4.46
Hunter-Gatherers*	PER3023	PER3023.SG	France_NouvelleAquitaine_Mesolithic.SG	BrunelPNAS2020	9050	F	45.77	0.33
Hunter-Gatherers*	PER503	PER503.SG	France_NouvelleAquitaine_Mesolithic.SG	BrunelPNAS2020	9050	F	45.77	0.33
Hunter-Gatherers*	Ranchot88	Ranchot88_published_d	France_Ranchot88_published	FuNature2016	10134	F	47.91	5.43
Hunter-Gatherers*	Rochedane	Rochedane_published	France_Rochedane_published	FuNature2016	13027	M	47.21	6.45
Hunter-Gatherers*	Bockstein	Bockstein_published_d	Germany_Bockstein_published	FuNature2016	8205	F	48.33	10.09
Hunter-Gatherers*	Falkenstein	Falkenstein	Germany_Falkenstein	MathiesonNature2018	9161	M	48.06	9.04
Hunter-Gatherers*	BDB001	BDB001	Germany_Mesolithic	RivollatScienceAdvance2020	8600	F	51.3	12.07
Hunter-Gatherers*	BOT004	BOT004	Germany_Mesolithic	RivollatScienceAdvance2020	7550	M	51.31	11.4
Hunter-Gatherers*	BOT005	BOT005	Germany_Mesolithic	RivollatScienceAdvance2020	7548	F	51.31	11.4
Hunter-Gatherers*	I1507	I1507	Hungary_EN_HG_Koros	MathiesonNature2015 (capture of same sample shotgunned in Gamba2014)	7661	M	47.93	21.2
Hunter-Gatherers*	I4971	I4971	Hungary_EN_HG_Koros	LipsonNature2017	7599	M	47.5592	20.7212
Hunter-Gatherers*	KGH6	KGH6.SG	Ireland_Mesolithic.SG	CassidyNature2020	6658	M	52.5985	-8.32836
Hunter-Gatherers*	SRA62	SRA62.SG	Ireland_Mesolithic.SG	CassidyNature2020	6001	M	54.297	-8.33599
Hunter-Gatherers*	I26770	R7.SG	Italy_Mesolithic.SG	AntonioGaoMootsScience2019	10706	M	41.96	13.54
Hunter-Gatherers*	I26772	R15.SG	Italy_Mesolithic.SG	AntonioGaoMootsScience2019	9086	M	41.96	13.54
Hunter-Gatherers*	Villabruna	Villabruna	Italy_North_Villabruna_HG	FuNature2016	14021	M	46.15	12.21
Hunter-Gatherers*	I2158	I2158	Italy_Sicily_HG_OrienteC	MathiesonNature2018	12000	F	37.9333	12.3333
Hunter-Gatherers*	Continenza	Continenza_d	Italy_South_HG_lc	FuNature2016	10875	F	41.96	13.54
Hunter-Gatherers*	I0001	Loschbour_snpAD.DG	Luxembourg_Loschbour_published.DG	LazaridisNature2014	8025	M	49.81	6.4
Hunter-Gatherers*	Hum1	Hum1.SG	Norway_Mesolithic.SG	GuntherPLoSBiology2018	9364	F	58.064	7.7437
Hunter-Gatherers*	Hum2	Hum2.SG	Norway_Mesolithic.SG	GuntherPLoSBiology2018	9364	M	58.064	7.7437
Hunter-Gatherers*	Steigen	Steigen.SG	Norway_N_HG.SG	GuntherPLoSBiology2018	5857	M	67.81	14.681
Hunter-Gatherers*	CMS001	CMS001_merged	Portugal_Geometric_Mesolithic	VillalbaMoucoCurrentBiology2019	8067	F	39.2464	-8.64747
Hunter-Gatherers*	I2534	I2534	Romania_IronGates_Mesolithic	MathiesonNature2018	7670	F	44.0272	25.3925
Hunter-Gatherers*	I4582	I4582	Romania_IronGates_Mesolithic	MathiesonNature2018	8618	F	44.517	22.722
Hunter-Gatherers*	I5411	I5411	Romania_IronGates_Mesolithic	MathiesonNature2018	8600	M	44.6261	22.6058
Hunter-Gatherers*	I4081	I4081_published	Romania_IronGates_Mesolithic_published	MathiesonNature2018	9361	M	44.517	22.722
Hunter-Gatherers*	I4607	I4607	Romania_IronGates_Mesolithic_published	MathiesonNature2018	8927	M	44.6261	22.6058
Hunter-Gatherers*	I4655	I4655_published	Romania_IronGates_Mesolithic_published	MathiesonNature2018	8764	M	44.6261	22.6058
Hunter-Gatherers*	I5436	I5436	Romania_IronGates_Mesolithic_published_dup.I4654	MathiesonNature2018	9025	F	44.6261	22.6058
Hunter-Gatherers*	I5408	I5408	Romania_IronGates_Mesolithic.SG	GonzalesFortesCurrentBiology2017	8704	M	44.517	22.722
Hunter-Gatherers*	M95	M95.SG	Romania_IronGates_Mesolithic.SG	GonzalesFortesCurrentBiology2017	8814	M	44.6261	22.6058
Hunter-Gatherers*	M96	M96.SG	Romania_IronGates_Mesolithic.SG	GonzalesFortesCurrentBiology2017	8825	M	44.6261	22.6058
Hunter-Gatherers*	I3065	I3065	Scotland_Mesolithic_all.SG	BraceDiekmannNatureEcologyEvolution2019	6290	F	56.0116	-6.24002
Hunter-Gatherers*	I4660	I4660	Serbia_IronGates_Mesolithic	MathiesonNature2018	9713	F	44.5337	22.0503
Hunter-Gatherers*	I4870	I4870	Serbia_IronGates_Mesolithic	MathiesonNature2018	8740	M	44.5337	22.0503
Hunter-Gatherers*	I4871	I4871	Serbia_IronGates_Mesolithic	MathiesonNature2018	8450	F	44.5337	22.0503
Hunter-Gatherers*	I4872	I4872	Serbia_IronGates_Mesolithic	MathiesonNature2018	8450	F	44.5337	22.0503
Hunter-Gatherers*	I4873	I4873	Serbia_IronGates_Mesolithic	MathiesonNature2018	7867	F	44.5337	22.0503
Hunter-Gatherers*	I4874	I4874	Serbia_IronGates_Mesolithic	MathiesonNature2018	8499	F	44.5337	22.0503
Hunter-Gatherers*	I4875	I4875	Serbia_IronGates_Mesolithic	MathiesonNature2018	8458	F	44.5337	22.0503
Hunter-Gatherers*	I4876	I4876	Serbia_IronGates_Mesolithic	MathiesonNature2018	8455	F	44.5337	22.0503
Hunter-Gatherers*	I4877	I4877	Serbia_IronGates_Mesolithic	MathiesonNature2018	8505	F	44.5337	22.0503
Hunter-Gatherers*	I4878	I4878	Serbia_IronGates_Mesolithic	MathiesonNature2018	7803	M	44.5337	22.0503
Hunter-Gatherers*	I4880	I4880	Serbia_IronGates_Mesolithic	MathiesonNature2018	7813	M	44.5337	22.0503
Hunter-Gatherers*	I4915	I4915	Serbia_IronGates_Mesolithic	MathiesonNature2018	8115	M	44.6403	22.3033
Hunter-Gatherers*	I4916	I4916	Serbia_IronGates_Mesolithic	MathiesonNature2018	8763	M	44.6403	22.3033
Hunter-Gatherers*	I4917	I4917	Serbia_IronGates_Mesolithic	MathiesonNature2018	8058	F	44.6403	22.3033
Hunter-Gatherers*	I5233	I5233	Serbia_IronGates_Mesolithic	MathiesonNature2018	8001	F	44.5959	22.0106
Hunter-Gatherers*	I5234	I5234	Serbia_IronGates_Mesolithic	MathiesonNature2018	9500	F	44.5959	22.0106
Hunter-Gatherers*	I5235	I5235	Serbia_IronGates_Mesolithic	MathiesonNature2018	10835	M	44.5959	22.0106
Hunter-Gatherers*	I5236	I5236	Serbia_IronGates_Mesolithic	MathiesonNature2018	10038	M	44.5959	22.0106
Hunter-Gatherers*	I5237	I5237	Serbia_IronGates_Mesolithic	MathiesonNature2018	9500	M	44.5959	22.0106
Hunter-Gatherers*	I5238	I5238	Serbia_IronGates_Mesolithic	MathiesonNature2018	9993	F	44.5959	22.0106
Hunter-Gatherers*	I5239	I5239	Serbia_IronGates_Mesolithic	MathiesonNature2018	10333	F	44.5959	22.0106
Hunter-Gatherers*	I5240	I5240	Serbia_IronGates_Mesolithic	MathiesonNature2018	10805	M	44.5959	22.0106
Hunter-Gatherers*	I5242	I5242	Serbia_IronGates_Mesolithic	MathiesonNature2018	10530	F	44.5959	22.0106
Hunter-Gatherers*	I5244	I5244	Serbia_IronGates_Mesolithic	MathiesonNature2018	10785	F	44.5959	22.0106
Hunter-Gatherers*	I5401	I5401	Serbia_IronGates_Mesolithic	MathiesonNature2018	8838	M	44.6403	22.3033
Hunter-Gatherers*	I5402	I5402	Serbia_IronGates_Mesolithic	MathiesonNature2018	8156	M	44.6403	22.3033
Hunter-Gatherers*	I5407	I5407	Serbia_IronGates_Mesolithic	MathiesonNature2018	8000	F	44.5529	22.0276
Hunter-Gatherers*	I5771	I5771	Serbia_IronGates_Mesolithic	MathiesonNature2018	8325	M	44.5337	22.0503
Hunter-Gatherers*	I5772	I5772	Serbia_IronGates_Mesolithic	MathiesonNature2018	8450	M	44.5337	22.0503
Hunter-Gatherers*	I5241	I5241	Serbia_IronGates_Mesolithic_daughter_I5236	MathiesonNature2018	11198	F	44.5959	22.0106
Hunter-Gatherers*	I4657	I4657_published	Serbia_IronGates_Mesolithic_published	MathiesonNature2018	11465	F	44.5337	22.0503
Hunter-Gatherers*	I4881	I4881_published	Serbia_IronGates_Mesolithic_published	MathiesonNature2018	8363	M	44.5337	22.0503
Hunter-Gatherers*	I4914	I4914_published	Serbia_IronGates_Mesolithic_published	MathiesonNature2018	8088	M	44.6403	22.3033
Hunter-Gatherers*	I5773	I5773_published	Serbia_IronGates_Mesolithic_published	MathiesonNature2018	10040	M	44.5337	22.0503
Hunter-Gatherers*	ElMiron	ElMiron_d	Spain_ElMiron	FuNature2016	18775	F	43.26	-3.45
Hunter-Gatherers*	I3209	I3209	Spain_HG	OlaldeScience2019	7815	M	40.4182	-0.11675
Hunter-Gatherers*	I8130	I8130	Spain_HG_lc	OlaldeScience2019	7957	M	39.79	-1.03333
Hunter-Gatherers*	I0585	I0585	Spain_HG_published.SG	OlaldeNature2014	7811	M	42.911	-5.3778
Hunter-Gatherers*	Canes	Canes.SG	Spain_HG.SG	GonzalesFortesCurrentBiology2017	7089	F	43.355	-4.71668
Hunter-Gatherers*	Chan	Chan.SG	Spain_HG.SG	GonzalesFortesCurrentBiology2017	9109	F	42.7344	-7.03054
Hunter-Gatherers*	BAL003	BAL003.A0101	Spain_UP_Azilian	VillalbaMoucoCurrentBiology2019	11908	M	42.0853	1.60168
Hunter-Gatherers*	BAL051	BAL051_merged	Spain_UP_Azilian	VillalbaMoucoCurrentBiology2019	13015	M	42.0853	1.60168
Hunter-Gatherers*	SBj	SBj.SG	Sweden_Mesolithic.SG	GuntherPLoSBiology2018	8771	M	57.792	18.538
Hunter-Gatherers*	SF12	SF12.SG	Sweden_Mesolithic.SG	GuntherPLoSBiology2018	8895	F	57.285	17.971
Hunter-Gatherers*	SF9	SF9.SG	Sweden_Mesolithic.SG	GuntherPLoSBiology2018	9144	F	57.285	17.971
Hunter-Gatherers*	I0011	I0011	Sweden_Motala_HG	MathiesonNature2015 (1240k of same same sample with 390k in HaakLazaridis2015)	7564	F	58.535	15.046
Hunter-Gatherers*	I0012	I0012	Sweden_Motala_HG	MathiesonNature2015 (1240k of same same sample with 390k in HaakLazaridis2015)	7598	M	58.535	15.046
Hunter-Gatherers*	I0013	I0013	Sweden_Motala_HG	MathiesonNature2015 (1240k of same same sample with 390k in HaakLazaridis2015)	7722	M	58.535	15.046
Hunter-Gatherers*	I0014	I0014	Sweden_Motala_HG	MathiesonNature2015 (1240k of same same sample with 390k in HaakLazaridis2015)	7686	F	58.535	15.046
Hunter-Gatherers*	I0015	I0015	Sweden_Motala_HG	MathiesonNature2015 (1240k of same same sample with 390k in HaakLazaridis2015)	7710	M	58.535	15.046
Hunter-Gatherers*	I0017	I0017	Sweden_Motala_HG.SG	LazaridisNature2014	7624	M	58.535	15.046
Hunter-Gatherers*	Bichon	Bichon.SG	Switzerland_Bichon.SG	JonesNatureCommunications2015	13698	M	47.1	6.87
Hunter-Gatherers*	I6754	I6754	Wales_Mesolithic	BraceDiekmannNatureEcologyEvolution2019	9580	M	51.6325	-4.6929
Bronze Age/Iron Age*	I5769	I5769	Bulgaria_IA	MathiesonNature2018	2592	F	43.1609	25.8834
Bronze Age/Iron Age*	I2163	I2163	Bulgaria_MLBA	MathiesonNature2018	3639	M	42.1329	25.4963
Bronze Age/Iron Age*	I4331	I4331	Croatia_MBA	MathiesonNature2018	3519	M	43.194	17.344
Bronze Age/Iron Age*	I4332	I4332	Croatia_MBA	MathiesonNature2018	3508	F	43.194	17.344
Bronze Age/Iron Age*	BNL010	BNL010	Czech_Bohemia_Unetice_EBA	PapacScienceAdvances2021	3772	F	50.1742	14.6465
Bronze Age/Iron Age*	KO1007	KO1007	Czech_Bohemia_Unetice_EBA	PapacScienceAdvances2021	3737	M	50.0333	15.1681
Bronze Age/Iron Age*	KO1015	KO1015	Czech_Bohemia_Unetice_EBA	PapacScienceAdvances2021	3774	F	50.0333	15.1681
Bronze Age/Iron Age*	MIB001	MIB001	Czech_Bohemia_Unetice_EBA	PapacScienceAdvances2021	3779	M	49.992	15.7769
Bronze Age/Iron Age*	MIB004	MIB004	Czech_Bohemia_Unetice_EBA	PapacScienceAdvances2021	3769	M	49.992	15.7769
Bronze Age/Iron Age*	MIB005	MIB005	Czech_Bohemia_Unetice_EBA	PapacScienceAdvances2021	3767	F	49.992	15.7769
Bronze Age/Iron Age*	MIB034	MIB034	Czech_Bohemia_Unetice_EBA	PapacScienceAdvances2021	3659	F	49.992	15.7769
Bronze Age/Iron Age*	VLI042	VLI042	Czech_Bohemia_Unetice_EBA	PapacScienceAdvances2021	3774	M	50.3659	14.4466
Bronze Age/Iron Age*	VLI050	VLI050	Czech_Bohemia_Unetice_EBA	PapacScienceAdvances2021	3796	F	50.3659	14.4466
Bronze Age/Iron Age*	VLI051	VLI051	Czech_Bohemia_Unetice_EBA	PapacScienceAdvances2021	3721	M	50.3659	14.4466
Bronze Age/Iron Age*	VLI053	VLI053	Czech_Bohemia_Unetice_EBA	PapacScienceAdvances2021	3550	F	50.3659	14.4466
Bronze Age/Iron Age*	I4884	I4884	Czech_EBA	OlaldeNature2018	3758	M	50.1217	14.457
Bronze Age/Iron Age*	I4892	I4892	Czech_EBA	OlaldeNature2018	3754	F	50.1217	14.457
Bronze Age/Iron Age*	DA111	DA111.SG	Czech_IA_Hallstatt.SG	DamgaardNature2018	2752	M	50.51	14.05
Bronze Age/Iron Age*	DA112	DA112.SG	Czech_IA_Hallstatt.SG	DamgaardNature2018	2507	F	50.51	14.05
Bronze Age/Iron Age*	RISE21	RISE21.SG	Denmark_BA.SG	AllentoftNature2015	3301	M	55.55	12.209
Bronze Age/Iron Age*	RISE47	RISE47.SG	Denmark_BA.SG	AllentoftNature2015	3380	M	56.97	9.552
Bronze Age/Iron Age*	VK213	VK213.SG	Denmark_IA.SG	MargaryanWillerslevNature2020	1561	F	55.73	12.12
Bronze Age/Iron Age*	VK521	VK521.SG	Denmark_IA.SG	MargaryanWillerslevNature2020	1650	M	55.6359	12.2414
Bronze Age/Iron Age*	VK532	VK532.SG	Denmark_IA.SG	MargaryanWillerslevNature2020	1850	M	55.6555	12.2451
Bronze Age/Iron Age*	VK582	VK582.SG	Denmark_IA.SG	MargaryanWillerslevNature2020	1900	M	56.05	9.94
Bronze Age/Iron Age*	RISE276	RISE276.SG	Denmark_LBA.SG	AllentoftNature2015	2612	M	55.914	11.565
Bronze Age/Iron Age*	I6680	I6680	England_BellBeaker_mediumEEF	OlaldeNature2018	3671	M	55.31	-1.55333
Bronze Age/Iron Age*	I2421	I2421	England_C_EBA	OlaldeNature2018	3790	M	54.883	-1.452
Bronze Age/Iron Age*	I2463	I2463	England_C_EBA	OlaldeNature2018	3774	F	51.33	1.36
Bronze Age/Iron Age*	I2464	I2464	England_C_EBA	OlaldeNature2018	3615	M	51.15	-1.75
Bronze Age/Iron Age*	I2602	I2602	England_C_EBA	OlaldeNature2018	3762	M	51.33	1.36
Bronze Age/Iron Age*	I2610	I2610	England_C_EBA	OlaldeNature2018	3783	F	54.97	-1.73
Bronze Age/Iron Age*	I5377	I5377	England_C_EBA	OlaldeNature2018	3758	M	51.4712	-0.266408
Bronze Age/Iron Age*	I5441	I5441	England_C_EBA	OlaldeNature2018	3750	M	50.4261	-3.58054
Bronze Age/Iron Age*	I7569	I7569	England_C_EBA	OlaldeNature2018	3484	F	52.6963	-0.34
Bronze Age/Iron Age*	I7570	I7570	England_C_EBA	OlaldeNature2018	3569	M	52.6963	-0.34
Bronze Age/Iron Age*	I7573	I7573	England_C_EBA	OlaldeNature2018	3520	F	52.3106	0.386227
Bronze Age/Iron Age*	I7630	I7630	England_C_EBA	OlaldeNature2018	3734	M	53.7262	-0.529641
Bronze Age/Iron Age*	I7639	I7639	England_C_EBA	OlaldeNature2018	3797	F	52.2769	0.461902
Bronze Age/Iron Age*	I7576	I7576	England_LBA	OlaldeNature2018	3039	M	52.1224	-0.511365
Bronze Age/Iron Age*	I7628	I7628	England_LBA	OlaldeNature2018	3033	M	52.1224	-0.511365
Bronze Age/Iron Age*	I5383	I5383	England_LBA_lowEEF	OlaldeNature2018	2945	F	54.1551	-2.47205
Bronze Age/Iron Age*	I2639	I2639	England_MBA	OlaldeNature2018	3430	F	51.168	-1.77254
Bronze Age/Iron Age*	I7568	I7568	England_MBA	OlaldeNature2018	3400	F	52.34	0.03
Bronze Age/Iron Age*	I7571	I7571	England_MBA	OlaldeNature2018	3306	M	52.34	0.03
Bronze Age/Iron Age*	I7572	I7572	England_MBA	OlaldeNature2018	3380	M	52.34	0.03
Bronze Age/Iron Age*	I7574	I7574	England_MBA	OlaldeNature2018	3271	F	52.1784	0.122544
Bronze Age/Iron Age*	I7575	I7575	England_MBA	OlaldeNature2018	3107	M	52.1224	-0.511365
Bronze Age/Iron Age*	I7577	I7577	England_MBA	OlaldeNature2018	3198	M	52.1224	-0.511365
Bronze Age/Iron Age*	I7578	I7578	England_MBA	OlaldeNature2018	3080	F	52.1224	-0.511365
Bronze Age/Iron Age*	I7626	I7626	England_MBA	OlaldeNature2018	3231	F	52.1224	-0.511365
Bronze Age/Iron Age*	I7627	I7627	England_MBA	OlaldeNature2018	3268	F	52.1224	-0.511365
Bronze Age/Iron Age*	I7640	I7640	England_MBA	OlaldeNature2018	3307	M	52.1784	0.122544
Bronze Age/Iron Age*	I2458	I2458	England_MBA_highEEF	OlaldeNature2018	3331	F	51.168	-1.77254
Bronze Age/Iron Age*	I7580	I7580	England_MBA_lowEEF	OlaldeNature2018	3087	F	52.1224	-0.511365
Bronze Age/Iron Age*	OBE3626-1	OBE3626-1.SG	France_GrandEst_EBA.SG	BrunelPNAS2020	3774	M	48.4623	7.48167
Bronze Age/Iron Age*	OBE3722	OBE3722.SG	France_GrandEst_EBA.SG	BrunelPNAS2020	3750	F	48.4623	7.48167
Bronze Age/Iron Age*	RIX15	RIX15.SG	France_GrandEst_EBA.SG	BrunelPNAS2020	3600	M	47.7444	7.39683
Bronze Age/Iron Age*	RIX4	RIX4.SG	France_GrandEst_EBA.SG	BrunelPNAS2020	3664	F	47.7444	7.39683
Bronze Age/Iron Age*	Jeb8	Jeb8.SG	France_GrandEst_IA1.SG	BrunelPNAS2020	2450	F	48.0089	7.38445
Bronze Age/Iron Age*	NOR2B6	NOR2B6.SG	France_GrandEst_IA1.SG	BrunelPNAS2020	2700	F	48.4453	7.67118
Bronze Age/Iron Age*	NOR3-15	NOR3-15.SG	France_GrandEst_IA1.SG	BrunelPNAS2020	2700	F	48.4453	7.67118
Bronze Age/Iron Age*	NOR3-6	NOR3-6.SG	France_GrandEst_IA1.SG	BrunelPNAS2020	2500	F	48.4453	7.67118
Bronze Age/Iron Age*	NOR4	NOR4.SG	France_GrandEst_IA1.SG	BrunelPNAS2020	2500	F	48.4453	7.67118
Bronze Age/Iron Age*	COL11	COL11.SG	France_GrandEst_IA2.SG	BrunelPNAS2020	2290	F	48.0793	7.35851
Bronze Age/Iron Age*	COL153A	COL153A.SG	France_GrandEst_IA2.SG	BrunelPNAS2020	2290	F	48.0793	7.35851
Bronze Age/Iron Age*	COL153i	COL153i.SG	France_GrandEst_IA2.SG	BrunelPNAS2020	2290	F	48.0793	7.35851
Bronze Age/Iron Age*	ERS1164	ERS1164.SG	France_GrandEst_IA2.SG	BrunelPNAS2020	2200	F	48.4235	7.66326
Bronze Age/Iron Age*	ERS86	ERS86.SG	France_GrandEst_IA2.SG	BrunelPNAS2020	2200	F	48.4235	7.66326
Bronze Age/Iron Age*	ERS88	ERS88.SG	France_GrandEst_IA2.SG	BrunelPNAS2020	2200	F	48.4235	7.66326
Bronze Age/Iron Age*	NIED	NIED.SG	France_GrandEst_LBA.SG	BrunelPNAS2020	2825	F	47.9848	7.39916
Bronze Age/Iron Age*	ATT26	ATT26.SG	France_HautsDeFrance_IA2.SG	BrunelPNAS2020	2200	F	49.413	3.0484
Bronze Age/Iron Age*	BFM265	BFM265.SG	France_HautsDeFrance_IA2.SG	BrunelPNAS2020	2175	F	49.3901	3.39243
Bronze Age/Iron Age*	GBVPO	GBVPO.SG	France_LaClape_LN_EMBA_BellBeakerPossible.SG	SeguinOrlandoCurrBio2021	3598	F	43.1491	3.06058
Bronze Age/Iron Age*	QUIN234	QUIN234.SG	France_Occitanie_EMBA.SG	BrunelPNAS2020	3600	F	43.2957	1.96175
Bronze Age/Iron Age*	QUIN58	QUIN58.SG	France_Occitanie_EMBA.SG	BrunelPNAS2020	3600	M	43.2957	1.96175
Bronze Age/Iron Age*	BES1248	BES1248.SG	France_Occitanie_IA2.SG	BrunelPNAS2020	2450	M	43.3614	3.42701
Bronze Age/Iron Age*	PECH5	PECH5.SG	France_Occitanie_IA2.SG	BrunelPNAS2020	2400	M	43.0456	2.95644
Bronze Age/Iron Age*	PECH8	PECH8.SG	France_Occitanie_IA2.SG	BrunelPNAS2020	2400	M	43.0456	2.95644
Bronze Age/Iron Age*	PEY163	PEY163.SG	France_Occitanie_IA2.SG	BrunelPNAS2020	2250	M	43.3114	3.48196
Bronze Age/Iron Age*	PEY53	PEY53.SG	France_Occitanie_IA2.SG	BrunelPNAS2020	2250	F	43.3114	3.48196
Bronze Age/Iron Age*	PT2	PT2.SG	France_Occitanie_IA2.SG	BrunelPNAS2020	2375	F	43.844	4.03237
Bronze Age/Iron Age*	Pir6	Pir6.SG	France_Occitanie_MBA.SG	BrunelPNAS2020	3584	F	43.2516	3.2202
Bronze Age/Iron Age*	RISE471	RISE471.SG	Germany_BA.SG	AllentoftNature2015	3543	M	48.17	10.814
Bronze Age/Iron Age*	Alh2	Alh2.SG	Germany_EarlyMiddle Ages*.SG	VeeramahPNAS2018	1529	F	48.58	12.2
Bronze Age/Iron Age*	I0099	I0099_published	Germany_LBA_Halberstadt_published	MathiesonNature2015	3024	M	51.8958	11.0467
Bronze Age/Iron Age*	AITI_119	AITI_119	Germany_Lech_EBA	MittnikScience2019	3747	M	48.2228	10.845
Bronze Age/Iron Age*	AITI_120	AITI_120	Germany_Lech_EBA	MittnikScience2019	3662	M	48.2228	10.845
Bronze Age/Iron Age*	AITI_2	AITI_2	Germany_Lech_EBA	MittnikScience2019	3753	M	48.2228	10.845
Bronze Age/Iron Age*	AITI_40	AITI_40	Germany_Lech_EBA	MittnikScience2019	3746	M	48.2228	10.845
Bronze Age/Iron Age*	AITI_43	AITI_43	Germany_Lech_EBA	MittnikScience2019	3760	M	48.2228	10.845
Bronze Age/Iron Age*	AITI_50	AITI_50	Germany_Lech_EBA	MittnikScience2019	3773	M	48.2228	10.845
Bronze Age/Iron Age*	AITI_62A	AITI_62A	Germany_Lech_EBA	MittnikScience2019	3732	M	48.2228	10.845
Bronze Age/Iron Age*	AITI_72	AITI_72	Germany_Lech_EBA	MittnikScience2019	3776	M	48.2228	10.845
Bronze Age/Iron Age*	AITI_78	AITI_78	Germany_Lech_EBA	MittnikScience2019	3748	M	48.2228	10.845
Bronze Age/Iron Age*	AITI_98	AITI_98	Germany_Lech_EBA	MittnikScience2019	3605	M	48.2228	10.845
Bronze Age/Iron Age*	WEHR_1192SkB	WEHR_1192SkB_d	Germany_Lech_EBA	MittnikScience2019	3785	F	48.2528	10.8088
Bronze Age/Iron Age*	OTTM_151ind1	OTTM_151ind1_d	Germany_Lech_MBA	MittnikScience2019	3602	F	48.2252	10.8498
Bronze Age/Iron Age*	OTTM_154	OTTM_154	Germany_Lech_MBA	MittnikScience2019	3709	M	48.2252	10.8498
Bronze Age/Iron Age*	OTTM_156	OTTM_156	Germany_Lech_MBA	MittnikScience2019	3448	M	48.2252	10.8498
Bronze Age/Iron Age*	OTTM_165	OTTM_165_d	Germany_Lech_MBA	MittnikScience2019	3572	F	48.2252	10.8498
Bronze Age/Iron Age*	OTTM_87	OTTM_87_d	Germany_Lech_MBA	MittnikScience2019	3540	F	48.2252	10.8498
Bronze Age/Iron Age*	OTTM_141	OTTM_141_d	Germany_Lech_MBA_lc	MittnikScience2019	3516	F	48.2252	10.8498
Bronze Age/Iron Age*	OTTM_84	OTTM_84_d	Germany_Lech_MBA_lc	MittnikScience2019	3503	F	48.2252	10.8498
Bronze Age/Iron Age*	FN2	FN2.SG	Germany_Roman.SG	VeeramahPNAS2018	1650	M	48.1407	11.4097
Bronze Age/Iron Age*	MX257	MX257	Germany_SouthernGermany_Singen_EBA	FurtwanglerNatureCommunications2020	3742	M	47.7671	8.87224
Bronze Age/Iron Age*	MX277	MX277	Germany_SouthernGermany_Singen_EBA	FurtwanglerNatureCommunications2020	3791	F	47.7671	8.87224
Bronze Age/Iron Age*	MX279	MX279	Germany_SouthernGermany_Singen_EBA	FurtwanglerNatureCommunications2020	3758	M	47.7671	8.87224
Bronze Age/Iron Age*	MX265	MX265	Germany_SouthernGermany_Singen_IA	FurtwanglerNatureCommunications2020	2569	M	47.7671	8.87224
Bronze Age/Iron Age*	I9006	I9006	Greece_BA_Mycenaean	LazaridisNature2017	3283	F	37.9663	23.4952
Bronze Age/Iron Age*	I9010	I9010	Greece_BA_Mycenaean	LazaridisNature2017	3250	F	37.501	23.451
Bronze Age/Iron Age*	I9041	I9041	Greece_BA_Mycenaean	LazaridisNature2017	3250	M	37.501	23.451
Bronze Age/Iron Age*	I9033	I9033	Greece_BA_Mycenaean_Pylos	LazaridisNature2017	3296	F	36.9167	21.7
Bronze Age/Iron Age*	I9123	I9123	Greece_Crete_Armenoi	LazaridisNature2017	3305	F	35.45	24.1667
Bronze Age/Iron Age*	DA191	DA191.SG	Hungary_IA_Scythian.SG	DamgaardNature2018	2472	F	47.5594	20.7081
Bronze Age/Iron Age*	DA194	DA194.SG	Hungary_IA_Scythian.SG	DamgaardNature2018	2328	F	46.3444	20.1625
Bronze Age/Iron Age*	DA195	DA195.SG	Hungary_IA_Scythian.SG	DamgaardNature2018	2572	F	46.3444	20.1625
Bronze Age/Iron Age*	DA197	DA197.SG	Hungary_IA_Scythian.SG	DamgaardNature2018	2426	M	46.3444	20.1625
Bronze Age/Iron Age*	I20751	I20751	Hungary_LBA	HarneyCheronetGenomeResearch2021	3200	F	47.2094	20.2631
Bronze Age/Iron Age*	I20773	I20773	Hungary_LBA	HarneyCheronetGenomeResearch2021	3200	F	47.2141	20.2613
Bronze Age/Iron Age*	I1504	I1504	Hungary_LBA_Kyjatice.SG	GambaNatureCommunications2014	2858	M	47.7251	20.0862
Bronze Age/Iron Age*	RISE373	RISE373.SG	Hungary_Maros_EBA.SG	AllentoftNature2015	3751	F	46.22	20.199
Bronze Age/Iron Age*	RISE374	RISE374.SG	Hungary_Maros_EBA.SG	AllentoftNature2015	3643	M	46.22	20.199
Bronze Age/Iron Age*	RISE247	RISE247.SG	Hungary_MBA_Vatya.SG	AllentoftNature2015	3607	M	47.327	18.962
Bronze Age/Iron Age*	RISE480	RISE480.SG	Hungary_MBA_Vatya.SG	AllentoftNature2015	3550	F	47.341	18.896
Bronze Age/Iron Age*	RISE483	RISE483.SG	Hungary_MBA_Vatya.SG	AllentoftNature2015	3700	F	47.341	18.896
Bronze Age/Iron Age*	RISE484	RISE484.SG	Hungary_MBA_Vatya.SG	AllentoftNature2015	3700	F	47.341	18.896
Bronze Age/Iron Age*	R1015	R1015.SG	Italy_IA_Republic.SG	AntonioGaoMootsScience2019	2800	F	42.0168	12.1004
Bronze Age/Iron Age*	R1016	R1016.SG	Italy_IA_Republic.SG	AntonioGaoMootsScience2019	2750	M	41.7516	12.4286
Bronze Age/Iron Age*	R1021	R1021.SG	Italy_IA_Republic.SG	AntonioGaoMootsScience2019	2600	M	41.6433	12.9127
Bronze Age/Iron Age*	R435	R435.SG	Italy_IA_Republic.SG	AntonioGaoMootsScience2019	2350	M	41.7952	12.779
Bronze Age/Iron Age*	R473	R473.SG	Italy_IA_Republic.SG	AntonioGaoMootsScience2019	2600	F	42.0889	11.7656
Bronze Age/Iron Age*	R474	R474.SG	Italy_IA_Republic.SG	AntonioGaoMootsScience2019	2600	M	42.0889	11.7656
Bronze Age/Iron Age*	R851	R851.SG	Italy_IA_Republic.SG	AntonioGaoMootsScience2019	2600	M	41.6027	12.5086
Bronze Age/Iron Age*	R113	R113.SG	Italy_Imperial.SG	AntonioGaoMootsScience2019	1850	M	41.918	12.4912
Bronze Age/Iron Age*	R114	R114.SG	Italy_Imperial.SG	AntonioGaoMootsScience2019	1850	F	41.918	12.4912
Bronze Age/Iron Age*	R115	R115.SG	Italy_Imperial.SG	AntonioGaoMootsScience2019	1850	M	41.918	12.4912
Bronze Age/Iron Age*	R123	R123.SG	Italy_Imperial.SG	AntonioGaoMootsScience2019	1780	M	41.685	13.1499
Bronze Age/Iron Age*	R125	R125.SG	Italy_Imperial.SG	AntonioGaoMootsScience2019	1750	F	41.685	13.1499
Bronze Age/Iron Age*	R126	R126.SG	Italy_Imperial.SG	AntonioGaoMootsScience2019	1650	F	41.685	13.1499
Bronze Age/Iron Age*	R128	R128.SG	Italy_Imperial.SG	AntonioGaoMootsScience2019	1750	M	41.685	13.1499
Bronze Age/Iron Age*	R131	R131.SG	Italy_Imperial.SG	AntonioGaoMootsScience2019	1850	M	41.918	12.4912
Bronze Age/Iron Age*	R1543	R1543.SG	Italy_Imperial.SG	AntonioGaoMootsScience2019	1750	M	42.1962	12.3253
Bronze Age/Iron Age*	R1544	R1544.SG	Italy_Imperial.SG	AntonioGaoMootsScience2019	1750	F	42.1962	12.3253
Bronze Age/Iron Age*	R1545	R1545.SG	Italy_Imperial.SG	AntonioGaoMootsScience2019	1750	M	42.1962	12.3253
Bronze Age/Iron Age*	R1548	R1548.SG	Italy_Imperial.SG	AntonioGaoMootsScience2019	1814	M	42.0659	12.5866
Bronze Age/Iron Age*	R1549	R1549.SG	Italy_Imperial.SG	AntonioGaoMootsScience2019	1814	M	42.0659	12.5866
Bronze Age/Iron Age*	R38	R38.SG	Italy_Imperial.SG	AntonioGaoMootsScience2019	1750	F	41.7479	12.2595
Bronze Age/Iron Age*	R39	R39.SG	Italy_Imperial.SG	AntonioGaoMootsScience2019	1798	F	41.7479	12.2595
Bronze Age/Iron Age*	R40	R40.SG	Italy_Imperial.SG	AntonioGaoMootsScience2019	1750	F	41.7479	12.2595
Bronze Age/Iron Age*	R41	R41.SG	Italy_Imperial.SG	AntonioGaoMootsScience2019	1750	F	41.7479	12.2595
Bronze Age/Iron Age*	R43	R43.SG	Italy_Imperial.SG	AntonioGaoMootsScience2019	1750	F	41.7479	12.2595
Bronze Age/Iron Age*	R436	R436.SG	Italy_Imperial.SG	AntonioGaoMootsScience2019	1850	F	41.7952	12.779
Bronze Age/Iron Age*	R44	R44.SG	Italy_Imperial.SG	AntonioGaoMootsScience2019	1750	M	41.7479	12.2595
Bronze Age/Iron Age*	R47	R47.SG	Italy_Imperial.SG	AntonioGaoMootsScience2019	1655	M	41.8442	12.549
Bronze Age/Iron Age*	R49	R49.SG	Italy_Imperial.SG	AntonioGaoMootsScience2019	1750	F	41.8442	12.549
Bronze Age/Iron Age*	R50	R50.SG	Italy_Imperial.SG	AntonioGaoMootsScience2019	1699	M	41.8442	12.549
Bronze Age/Iron Age*	R51	R51.SG	Italy_Imperial.SG	AntonioGaoMootsScience2019	1750	F	41.8442	12.549
Bronze Age/Iron Age*	R66	R66.SG	Italy_Imperial.SG	AntonioGaoMootsScience2019	1750	M	41.8337	12.4686
Bronze Age/Iron Age*	R69	R69.SG	Italy_Imperial.SG	AntonioGaoMootsScience2019	1750	F	41.8337	12.4686
Bronze Age/Iron Age*	R71	R71.SG	Italy_Imperial.SG	AntonioGaoMootsScience2019	1750	F	41.8337	12.4686
Bronze Age/Iron Age*	R72	R72.SG	Italy_Imperial.SG	AntonioGaoMootsScience2019	1750	F	41.8337	12.4686
Bronze Age/Iron Age*	R73	R73.SG	Italy_Imperial.SG	AntonioGaoMootsScience2019	1750	F	41.8337	12.4686
Bronze Age/Iron Age*	R75	R75.SG	Italy_Imperial.SG	AntonioGaoMootsScience2019	1850	F	41.9207	12.4895
Bronze Age/Iron Age*	R76	R76.SG	Italy_Imperial.SG	AntonioGaoMootsScience2019	1850	M	41.9207	12.4895
Bronze Age/Iron Age*	R78	R78.SG	Italy_Imperial.SG	AntonioGaoMootsScience2019	1850	F	41.9207	12.4895
Bronze Age/Iron Age*	R81	R81.SG	Italy_Imperial.SG	AntonioGaoMootsScience2019	1850	M	41.9207	12.4895
Bronze Age/Iron Age*	R835	R835.SG	Italy_Imperial.SG	AntonioGaoMootsScience2019	1814	M	43.312	13.6512
Bronze Age/Iron Age*	R836	R836.SG	Italy_Imperial.SG	AntonioGaoMootsScience2019	1814	F	43.312	13.6512
Bronze Age/Iron Age*	R130	R130.SG	Italy_LA.SG	AntonioGaoMootsScience2019	1550	M	41.8892	12.5007
Bronze Age/Iron Age*	R133	R133.SG	Italy_LA.SG	AntonioGaoMootsScience2019	1550	F	41.8892	12.5007
Bronze Age/Iron Age*	R134	R134.SG	Italy_LA.SG	AntonioGaoMootsScience2019	1550	F	41.8892	12.5007
Bronze Age/Iron Age*	R136	R136.SG	Italy_LA.SG	AntonioGaoMootsScience2019	1550	M	41.8892	12.5007
Bronze Age/Iron Age*	R137	R137.SG	Italy_LA.SG	AntonioGaoMootsScience2019	1550	F	41.8892	12.5007
Bronze Age/Iron Age*	JK2720	SUA003	Italy_Sardinia_BA_Nuragic	MarcusNatureCommunications2020	3112	M	39.87	9.2356
Bronze Age/Iron Age*	ORC001	ORC001	Italy_Sardinia_BA_Nuragic	MarcusNatureCommunications2020	3163	F	39.6672	9.42611
Bronze Age/Iron Age*	ORC003	ORC003	Italy_Sardinia_BA_Nuragic	MarcusNatureCommunications2020	3181	M	39.6672	9.42611
Bronze Age/Iron Age*	ORC004	ORC004	Italy_Sardinia_BA_Nuragic	MarcusNatureCommunications2020	3226	M	39.6672	9.42611
Bronze Age/Iron Age*	ORC005	ORC005	Italy_Sardinia_BA_Nuragic	MarcusNatureCommunications2020	3140	F	39.6672	9.42611
Bronze Age/Iron Age*	ORC006	ORC006	Italy_Sardinia_BA_Nuragic	MarcusNatureCommunications2020	3123	M	39.6672	9.42611
Bronze Age/Iron Age*	ORC007	ORC007	Italy_Sardinia_BA_Nuragic	MarcusNatureCommunications2020	3173	M	39.6672	9.42611
Bronze Age/Iron Age*	ORC008	ORC008	Italy_Sardinia_BA_Nuragic	MarcusNatureCommunications2020	3023	M	39.6672	9.42611
Bronze Age/Iron Age*	ORC009	ORC009	Italy_Sardinia_BA_Nuragic	MarcusNatureCommunications2020	3062	F	39.6672	9.42611
Bronze Age/Iron Age*	SUA006	SUA006	Italy_Sardinia_BA_Nuragic	MarcusNatureCommunications2020	3128	F	39.87	9.2356
Bronze Age/Iron Age*	I0206	S1249	Italy_Sardinia_EBA	MarcusNatureCommunications2020	3650	M	39.8667	9.23333
Bronze Age/Iron Age*	I0207	S1250	Italy_Sardinia_EBA	MarcusNatureCommunications2020	3650	M	39.8667	9.23333
Bronze Age/Iron Age*	I0209	S1252	Italy_Sardinia_EBA	MarcusNatureCommunications2020	3650	M	39.8667	9.23333
Bronze Age/Iron Age*	I0210	S1253	Italy_Sardinia_EBA	MarcusNatureCommunications2020	3650	M	39.8667	9.23333
Bronze Age/Iron Age*	I18945	SUC009	Italy_Sardinia_EBA	MarcusNatureCommunications2020	3667	M	40.8103	8.44418
Bronze Age/Iron Age*	JK2723	LON001	Italy_Sardinia_EBA	MarcusNatureCommunications2020	3775	F	39.87	9.2356
Bronze Age/Iron Age*	JK2739	ISB001	Italy_Sardinia_EBA	MarcusNatureCommunications2020	3735	M	39.87	9.2356
Bronze Age/Iron Age*	I10366	I10366	Italy_Sardinia_IA_1	FernandesNatureEcologyEvolution2020	2244	F	39.81	8.84
Bronze Age/Iron Age*	I16163	I16163	Italy_Sardinia_IA_2	FernandesNatureEcologyEvolution2020	2576	F	40.6267	8.32306
Bronze Age/Iron Age*	VIL006	VIL006	Italy_Sardinia_IA_Punic_1	MarcusNatureCommunications2020	2622	F	39.618	8.95812
Bronze Age/Iron Age*	VIL007	VIL007	Italy_Sardinia_IA_Punic_1	MarcusNatureCommunications2020	2409	M	39.618	8.95812
Bronze Age/Iron Age*	VIL009	VIL009	Italy_Sardinia_IA_Punic_1	MarcusNatureCommunications2020	2400	F	39.618	8.95812
Bronze Age/Iron Age*	VIL010	VIL010	Italy_Sardinia_IA_Punic_1	MarcusNatureCommunications2020	2741	F	39.618	8.95812
Bronze Age/Iron Age*	VIL011	VIL011	Italy_Sardinia_IA_Punic_1	MarcusNatureCommunications2020	2754	M	39.618	8.95812
Bronze Age/Iron Age*	MSR002	MSR002	Italy_Sardinia_IA_Punic_2	MarcusNatureCommunications2020	2674	M	39.1839	8.49329
Bronze Age/Iron Age*	MSR003	MSR003	Italy_Sardinia_IA_Punic_2	MarcusNatureCommunications2020	2500	F	39.1839	8.49329
Bronze Age/Iron Age*	ORC002	ORC002	Italy_Sardinia_IA_Punic_2	MarcusNatureCommunications2020	2249	M	39.6672	9.42611
Bronze Age/Iron Age*	VIL004	VIL004	Italy_Sardinia_IA_Punic_2	MarcusNatureCommunications2020	2381	F	39.618	8.95812
Bronze Age/Iron Age*	I12223	I12223	Italy_Sardinia_LA_published	FernandesNatureEcologyEvolution2020	1597	M	39.1808	9.1585
Bronze Age/Iron Age*	I10364	I10364	Italy_Sardinia_LBA	FernandesNatureEcologyEvolution2020	2925	M	40.55	8.31
Bronze Age/Iron Age*	I10552	I10552	Italy_Sardinia_LBA	FernandesNatureEcologyEvolution2020	3234	F	39.6833	9.43333
Bronze Age/Iron Age*	I10553	I10553	Italy_Sardinia_LBA	FernandesNatureEcologyEvolution2020	3110	M	39.6833	9.43333
Bronze Age/Iron Age*	I10554	I10554	Italy_Sardinia_LBA	FernandesNatureEcologyEvolution2020	3122	F	39.6833	9.43333
Bronze Age/Iron Age*	I3642	I3642	Italy_Sardinia_LBA	FernandesNatureEcologyEvolution2020	2994	M	40.5467	8.32156
Bronze Age/Iron Age*	I3741	I3741	Italy_Sardinia_LBA	FernandesNatureEcologyEvolution2020	3088	F	39.6833	9.43333
Bronze Age/Iron Age*	I10502	I10502_published	Italy_Sardinia_LBA_published	FernandesNatureEcologyEvolution2020	3151	M	39.8509	9.37724
Bronze Age/Iron Age*	I16161	I16161	Italy_Sardinia_MBA	FernandesNatureEcologyEvolution2020	3434	F	40.6267	8.32306
Bronze Age/Iron Age*	I16170	I16170_published	Italy_Sardinia_MBA_published	FernandesNatureEcologyEvolution2020	3337	M	40.6267	8.32306
Bronze Age/Iron Age*	AMC005	AMC005	Italy_Sardinia_Roman	MarcusNatureCommunications2020	1775	F	40.5666	8.34788
Bronze Age/Iron Age*	AMC014	AMC014	Italy_Sardinia_Roman	MarcusNatureCommunications2020	1745	M	40.5666	8.34788
Bronze Age/Iron Age*	I7796	I7796	Italy_Sicily_EBA	FernandesNatureEcologyEvolution2020	3731	M	36.8831	14.5712
Bronze Age/Iron Age*	I10371	I10371	Italy_Sicily_LBA	FernandesNatureEcologyEvolution2020	3100	F	37.68	12.789
Bronze Age/Iron Age*	I10372	I10372	Italy_Sicily_LBA	FernandesNatureEcologyEvolution2020	3198	F	37.68	12.789
Bronze Age/Iron Age*	I3876	I3876	Italy_Sicily_LBA	FernandesNatureEcologyEvolution2020	2928	M	37.68	12.789
Bronze Age/Iron Age*	I3878	I3878	Italy_Sicily_LBA	FernandesNatureEcologyEvolution2020	3216	F	37.68	12.789
Bronze Age/Iron Age*	I4070	I4070	Netherlands_BA	OlaldeNature2018	3703	M	52.7336	5.09618
Bronze Age/Iron Age*	I4071	I4071	Netherlands_BA	OlaldeNature2018	3717	F	52.7336	5.09618
Bronze Age/Iron Age*	I4076	I4076	Netherlands_BellBeaker	OlaldeNature2018	3763	F	52.7336	5.09618
Bronze Age/Iron Age*	I4067	I4067_published	Netherlands_BellBeaker_published	OlaldeNature2018	3770	F	52.7336	5.09618
Bronze Age/Iron Age*	VK418	VK418.SG	Norway_IA.SG	MargaryanWillerslevNature2020	1600	M	67.94	14.98
Bronze Age/Iron Age*	RISE150	RISE150.SG	Poland_EBA_Unetice.SG	AllentoftNature2015	3744	F	50.918	16.957
Bronze Age/Iron Age*	RISE154	RISE154.SG	Poland_EBA_Unetice.SG	AllentoftNature2015	3786	F	50.948	16.943
Bronze Age/Iron Age*	I7687	I7687	Portugal_LBA	OlaldeScience2019	2900	M	40.0869	-8.5166
Bronze Age/Iron Age*	I7688	I7688	Portugal_LBA	OlaldeScience2019	2900	F	40.0869	-8.5166
Bronze Age/Iron Age*	I8045	I8045	Portugal_MBA	OlaldeScience2019	3450	F	38.1988	-8.71
Bronze Age/Iron Age*	MonteGato104	MonteGato104.SG	Portugal_MBA.SG	MartinianoPLoSGenetics2017	3546	M	37.9447	-7.59889
Bronze Age/Iron Age*	TV32032extra	TV32032extra.SG	Portugal_MBA.SG	MartinianoPLoSGenetics2017	3550	M	37.199	-8.58798
Bronze Age/Iron Age*	TV3831	TV3831.SG	Portugal_MBA.SG	MartinianoPLoSGenetics2017	3550	M	37.199	-8.58798
Bronze Age/Iron Age*	ValeOuro10207	ValeOuro10207.SG	Portugal_MBA.SG	MartinianoPLoSGenetics2017	3550	F	38.05	-8.1
Bronze Age/Iron Age*	I2981	I2981	Scotland_C_EBA	OlaldeNature2018	3711	F	59.281	-2.425
Bronze Age/Iron Age*	I5516	I5516	Scotland_C_EBA	OlaldeNature2018	3641	M	56.1927	-4.0577
Bronze Age/Iron Age*	I2859	I2859	Scotland_LBA	OlaldeNature2018	2810	M	57.72	-3.388
Bronze Age/Iron Age*	I2860	I2860	Scotland_LBA	OlaldeNature2018	2824	M	57.721	-3.3881
Bronze Age/Iron Age*	I2861	I2861	Scotland_LBA	OlaldeNature2018	2843	F	57.721	-3.3881
Bronze Age/Iron Age*	I3130	I3130	Scotland_LBA	OlaldeNature2018	2844	F	57.72	-3.388
Bronze Age/Iron Age*	I2573	I2573	Scotland_MBA	OlaldeNature2018	3361	F	55.98	-2.896
Bronze Age/Iron Age*	I2653	I2653	Scotland_MBA	OlaldeNature2018	3224	M	55.98	-2.896
Bronze Age/Iron Age*	I2654	I2654	Scotland_MBA	OlaldeNature2018	3287	F	55.98	-2.896
Bronze Age/Iron Age*	I2655	I2655	Scotland_MBA	OlaldeNature2018	3311	M	58.23	-6.935
Bronze Age/Iron Age*	I2656	I2656_published_d	Scotland_MBA_published	OlaldeNature2018	3081	M	55.97	-2.896
Bronze Age/Iron Age*	VK203	VK203.SG	Scotland_Viking.SG	MargaryanWillerslevNature2020	1589	M	59.133	-3.319
Bronze Age/Iron Age*	DA119	DA119.SG	Slovakia_Poprad.SG	DamgaardNature2018	1600	M	49.0778	20.3172
Bronze Age/Iron Age*	ATP9	ATP9.SG	Spain_BA.SG	GuntherPNAS2015	3628	F	42.3525	-3.51833
Bronze Age/Iron Age*	COV20126	COV20126.SG	Spain_BA.SG	GonzalesFortesProcRoyalSocB2019	3632	M	37.4061	-4.41639
Bronze Age/Iron Age*	esp005	esp005.SG	Spain_BA.SG	ValdioseraPNAS2018	3400	M	42.3229	-2.41212
Bronze Age/Iron Age*	pir001	pir001.SG	Spain_BA.SG	ValdioseraPNAS2018	3725	M	37.4378	-4.19832
Bronze Age/Iron Age*	I12809	I12809	Spain_EBA	OlaldeScience2019	3775	M	38.5781	-2.8417
Bronze Age/Iron Age*	I12855	I12855	Spain_EBA	OlaldeScience2019	3775	M	38.5781	-2.8417
Bronze Age/Iron Age*	I1310	I1310	Spain_EBA	OlaldeScience2019	3650	F	41.5373	2.1329
Bronze Age/Iron Age*	I1836	I1836	Spain_EBA	OlaldeScience2019	3527	M	41.223	1.7742
Bronze Age/Iron Age*	I1840	I1840	Spain_EBA	OlaldeScience2019	3475	M	42.57	-2.62
Bronze Age/Iron Age*	I1977	I1977	Spain_EBA	OlaldeScience2019	3475	F	42.57	-2.62
Bronze Age/Iron Age*	I3486	I3486	Spain_EBA	OlaldeScience2019	3575	M	38.6314	-0.8615
Bronze Age/Iron Age*	I3487	I3487	Spain_EBA	OlaldeScience2019	3603	M	38.6314	-0.8615
Bronze Age/Iron Age*	I3488	I3488	Spain_EBA	OlaldeScience2019	3575	M	38.6314	-0.8615
Bronze Age/Iron Age*	I3490	I3490	Spain_EBA	OlaldeScience2019	3450	F	41.7412	-3.8744
Bronze Age/Iron Age*	I3491	I3491	Spain_EBA	OlaldeScience2019	3450	F	41.6565	-4.6695
Bronze Age/Iron Age*	I3494	I3494	Spain_EBA	OlaldeScience2019	3781	M	38.8494	-0.87138
Bronze Age/Iron Age*	I3997	I3997	Spain_EBA	OlaldeScience2019	3642	M	39.5268	-0.509749
Bronze Age/Iron Age*	I4559	I4559	Spain_EBA	OlaldeScience2019 (the correct coverage is shown here but is underreported in Table S1 of the publication)	3550	M	41.2916	1.0638
Bronze Age/Iron Age*	I4560	I4560	Spain_EBA	OlaldeScience2019 (the correct coverage is shown here but is underreported in Table S1 of the publication)	3550	F	41.2916	1.0638
Bronze Age/Iron Age*	I4561	I4561	Spain_EBA	OlaldeScience2019 (the correct coverage is shown here but is underreported in Table S1 of the publication)	3550	F	41.2916	1.0638
Bronze Age/Iron Age*	I4562	I4562	Spain_EBA	OlaldeScience2019	3614	F	41.2916	1.0638
Bronze Age/Iron Age*	I6470	I6470	Spain_EBA	OlaldeScience2019	3609	M	42.7251	3.84239
Bronze Age/Iron Age*	I6618	I6618	Spain_EBA	OlaldeScience2019	3735	M	40.22	-3.76
Bronze Age/Iron Age*	I8144	I8144	Spain_EBA	OlaldeScience2019	3680	F	37.7263	-2.5141
Bronze Age/Iron Age*	VAD001	VAD001	Spain_EBA	OlaldeScience2019	3641	M	42.44	-2.8867
Bronze Age/Iron Age*	VAD002	VAD002	Spain_EBA	OlaldeScience2019	3650	M	42.44	-2.8867
Bronze Age/Iron Age*	VAD003	VAD003	Spain_EBA	OlaldeScience2019	3650	F	42.44	-2.8867
Bronze Age/Iron Age*	VAD004	VAD004	Spain_EBA	OlaldeScience2019	3650	M	42.44	-2.8867
Bronze Age/Iron Age*	VAD005	VAD005	Spain_EBA	OlaldeScience2019	3590	M	42.44	-2.8867
Bronze Age/Iron Age*	I7162	I7162_published	Spain_EBA_Africa_published	OlaldeScience2019	3760	F	36.3914	-6.1685
Bronze Age/Iron Age*	I12410	I12410	Spain_IA	OlaldeScience2019	2375	M	41.3616	1.6694
Bronze Age/Iron Age*	I12640	I12640	Spain_IA	OlaldeScience2019	2550	M	41.5373	2.1329
Bronze Age/Iron Age*	I12641	I12641	Spain_IA	OlaldeScience2019	2599	M	41.5373	2.1329
Bronze Age/Iron Age*	I12877	I12877	Spain_IA	OlaldeScience2019	2400	M	41.3616	1.6694
Bronze Age/Iron Age*	I12878	I12878	Spain_IA	OlaldeScience2019	2360	F	41.3616	1.6694
Bronze Age/Iron Age*	I12879	I12879	Spain_IA	OlaldeScience2019	2429	F	41.3324	1.5943
Bronze Age/Iron Age*	I3322	I3322	Spain_IA	OlaldeScience2019	2500	F	40.5067	0.4314
Bronze Age/Iron Age*	I3323	I3323	Spain_IA	OlaldeScience2019	2226	M	42.0066	3.07867
Bronze Age/Iron Age*	I3758	I3758	Spain_IA_Celt	OlaldeScience2019	2226	F	42.565	-2.58635
Bronze Age/Iron Age*	I3759	I3759	Spain_IA_Celt	OlaldeScience2019	2222	M	42.565	-2.58635
Bronze Age/Iron Age*	I12642	I12642	Spain_IA_lc	OlaldeScience2019	2443	F	41.5373	2.1329
Bronze Age/Iron Age*	I12561	I12561	Spain_IA_Tartessian	OlaldeScience2019	2550	M	37.5183	-5.97833
Bronze Age/Iron Age*	I12171	I12171_published	Spain_IA_Tartessian_published	OlaldeScience2019	2608	F	37.5183	-5.97833
Bronze Age/Iron Age*	I2469	I2469_published	Spain_LBA_published	OlaldeScience2019	2826	F	42.57	-2.62
Bronze Age/Iron Age*	I8570	I8570_published	Spain_LBA_published	OlaldeScience2019	3100	M	40.1391	0.1054
Bronze Age/Iron Age*	I8571	I8571	Spain_LBA_published	OlaldeScience2019	3350	M	40.1391	0.1054
Bronze Age/Iron Age*	I12208	I12208	Spain_MBA	OlaldeScience2019	3250	F	41.4584	-5.2872
Bronze Age/Iron Age*	I12209	I12209	Spain_MBA	OlaldeScience2019	3250	M	41.4584	-5.2872
Bronze Age/Iron Age*	I2472	I2472	Spain_MBA	OlaldeScience2019	3428	M	42.57	-2.62
Bronze Age/Iron Age*	I3493	I3493	Spain_MBA	OlaldeScience2019	3301	F	40.8586	-5.3518
Bronze Age/Iron Age*	I2470	I2470_published	Spain_MBA_published	OlaldeScience2019	3275	M	42.57	-2.62
Bronze Age/Iron Age*	I3315	I3315_published	Spain_Menorca_LBA	FernandesNatureEcologyEvolution2020	2809	M	39.999	3.891
Bronze Age/Iron Age*	I10865	I10865	Spain_Roman	OlaldeScience2019	1800	M	42.1333	3.1083
Bronze Age/Iron Age*	I3982	I3982	Spain_Roman	OlaldeScience2019	1650	F	37.1775	-3.60917
Bronze Age/Iron Age*	I3983	I3983	Spain_Roman	OlaldeScience2019	1550	M	37.1775	-3.60917
Bronze Age/Iron Age*	I4055	I4055_published	Spain_Roman_published	OlaldeScience2019	1650	M	37.1775	-3.60917
Bronze Age/Iron Age*	I6491	I6491_published	Spain_Roman_published	OlaldeScience2019	1600	M	41.274	1.178
Bronze Age/Iron Age*	RISE175	RISE175.SG	Sweden_BA.SG	AllentoftNature2015	3233	M	55.397	13.6
Bronze Age/Iron Age*	RISE207	RISE207.SG	Sweden_BA.SG	AllentoftNature2015	3344	M	55.997	14.104
Bronze Age/Iron Age*	RISE210	RISE210.SG	Sweden_BA.SG	AllentoftNature2015	3312	F	55.997	14.104
Bronze Age/Iron Age*	VK579	VK579.SG	Sweden_IA_1.SG	MargaryanWillerslevNature2020	1650	M	56.5046	16.4294
Bronze Age/Iron Age*	VK522	VK522.SG	Sweden_IA_2.SG	MargaryanWillerslevNature2020	1550	F	56.535	16.605
Bronze Age/Iron Age*	oll009	oll009.SG	Sweden_Late_N.SG	MalmstromProcBiolSci2019	3787	M	56.0147	14.068
Bronze Age/Iron Age*	oll010	oll010.SG	Sweden_Late_N.SG	MalmstromProcBiolSci2019	3704	F	56.0147	14.068
Bronze Age/Iron Age*	TU905(SX18)	TU905_SX18	Switzerland_EBA_2	FurtwanglerNatureCommunications2020	2032	F	47.45	9.292
Bronze Age/Iron Age*	TU907(SX20)	TU907_SX20	Switzerland_EBA_2	FurtwanglerNatureCommunications2020	3576	M	47.45	9.292
Bronze Age/Iron Age*	TU911(SX23)	TU911_SX23	Switzerland_EBA_2	FurtwanglerNatureCommunications2020	3762	F	47.45	9.292
Bronze Age/Iron Age*	I2574	I2574_published	Wales_MBA_published	OlaldeNature2018	3277	F	53.33	-3.78
Late Farmers*	I2175	I2175	Bulgaria_EBA	MathiesonNature2018	5097	M	43.0578	26.9836
Late Farmers*	I2520	I2520	Bulgaria_EBA	MathiesonNature2018	5153	M	43.1609	25.8834
Late Farmers*	I5079	I5079	Croatia_N_Starcevo	MathiesonNature2018	5421	F	45.4885	17.6413
Late Farmers*	I6677	I6677	Czech_Baalberge	NarasimhanPattersonScience2019	5550	M	50.5481	13.7761
Late Farmers*	HOL002	HOL002	Czech_Bohemia_Baden_N	PapacScienceAdvances2021	5140	F	50.2006	14.2903
Late Farmers*	HOL004	HOL004	Czech_Bohemia_Baden_N	PapacScienceAdvances2021	5154	F	50.2006	14.2903
Late Farmers*	BRZ002	BRZ002	Czech_Bohemia_FunnelBeaker_N	PapacScienceAdvances2021	5521	F	50.3575	13.7436
Late Farmers*	HOL001	HOL001	Czech_Bohemia_FunnelBeaker_N	PapacScienceAdvances2021	5613	F	50.2006	14.2903
Late Farmers*	KOB002	KOB002	Czech_Bohemia_FunnelBeaker_N	PapacScienceAdvances2021	5630	F	50.0087	15.2309
Late Farmers*	KOB003	KOB003	Czech_Bohemia_FunnelBeaker_N	PapacScienceAdvances2021	5600	M	50.0087	15.2309
Late Farmers*	KOB004	KOB004	Czech_Bohemia_FunnelBeaker_N	PapacScienceAdvances2021	5600	F	50.0087	15.2309
Late Farmers*	KOB005	KOB005	Czech_Bohemia_FunnelBeaker_N	PapacScienceAdvances2021	5704	F	50.0087	15.2309
Late Farmers*	BRZ001	BRZ001	Czech_Bohemia_Jordanow_Michelsberg_N	PapacScienceAdvances2021	5820	M	50.3575	13.7436
Late Farmers*	I14167	I14167	Czech_C_Baalberge	PapacScienceAdvances2021	5850	M	50.1458	14.2214
Late Farmers*	I14169	I14169	Czech_C_Baalberge	PapacScienceAdvances2021	5850	M	50.1458	14.2214
Late Farmers*	I14170	I14170	Czech_C_Baalberge	PapacScienceAdvances2021	5850	M	50.1458	14.2214
Late Farmers*	I14171	I14171	Czech_C_Baalberge	PapacScienceAdvances2021	5850	F	50.1458	14.2214
Late Farmers*	I14172	I14172	Czech_C_Baalberge	PapacScienceAdvances2021	5850	F	50.1458	14.2214
Late Farmers*	I14173	I14173	Czech_C_Baalberge	PapacScienceAdvances2021	5850	M	50.1458	14.2214
Late Farmers*	I14174	I14174	Czech_C_Baalberge	PapacScienceAdvances2021	5850	M	50.1458	14.2214
Late Farmers*	I14175	I14175	Czech_C_Baalberge	PapacScienceAdvances2021	5850	F	50.1458	14.2214
Late Farmers*	I14176	I14176	Czech_C_Baalberge	PapacScienceAdvances2021	5550	M	50.1458	14.2214
Late Farmers*	I16121	I16121	Czech_C_Baalberge	PapacScienceAdvances2021	5850	F	50.1458	14.2214
Late Farmers*	I16122	I16122	Czech_C_Baalberge	PapacScienceAdvances2021	5850	F	50.1458	14.2214
Late Farmers*	I7186	I7186	Czech_C_Baalberge	PapacScienceAdvances2021	5713	F	50.1458	14.2214
Late Farmers*	I7188	I7188	Czech_C_Baalberge	PapacScienceAdvances2021	5610	F	50.1458	14.2214
Late Farmers*	I7189	I7189	Czech_C_Baalberge	PapacScienceAdvances2021	5526	F	50.1458	14.2214
Late Farmers*	I7191	I7191	Czech_C_Baalberge	PapacScienceAdvances2021	5657	F	50.1458	14.2214
Late Farmers*	I7192	I7192	Czech_C_Baalberge	PapacScienceAdvances2021	5552	M	50.1458	14.2214
Late Farmers*	I7194	I7194	Czech_C_Baalberge	PapacScienceAdvances2021	5527	F	50.1458	14.2214
Late Farmers*	I7272	I7272	Czech_Eneolithic	OlaldeNature2018	5417	M	50.19	14.158
Late Farmers*	I0518	I0518	England_N	OlaldeNature2018	5180	M	52.2173	-0.940217
Late Farmers*	I0519	I0519	England_N	OlaldeNature2018	5180	M	52.2173	-0.940217
Late Farmers*	I0520	I0520	England_N	OlaldeNature2018	5180	M	52.2173	-0.940217
Late Farmers*	I2605	I2605	England_N	OlaldeNature2018	5397	F	51.4928	-0.665402
Late Farmers*	I2606	I2606	England_N	OlaldeNature2018	5065	M	51.4928	-0.665402
Late Farmers*	I3005	I3005	England_N	BraceDiekmannNatureEcologyEvolution2019	5657	F	51.3247	-2.75325
Late Farmers*	I3068	I3068	England_N	OlaldeNature2018	5533	M	53.0798	-1.64094
Late Farmers*	I5366	I5366	England_N	OlaldeNature2018	5516	F	50.8609	-0.399007
Late Farmers*	I3040	I3040	England_N_all.SG	BraceDiekmannNatureEcologyEvolution2019	5525	M	50.829	-0.112825
Late Farmers*	I6746	I6746	England_N_all.SG	BraceDiekmannNatureEcologyEvolution2019	5526	F	51.3247	-2.75325
Late Farmers*	I6747	I6747	England_N_all.SG	BraceDiekmannNatureEcologyEvolution2019	5528	M	53.0798	-1.64094
Late Farmers*	I6750	I6750	England_N_all.SG	OlaldeNature2018	5650	M	51.0912	-1.72751
Late Farmers*	I6751	I6751	England_N_all.SG	OlaldeNature2018	5650	F	51.0912	-1.72751
Late Farmers*	I6753	I6753	England_N_all.SG	BraceDiekmannNatureEcologyEvolution2019	5305	M	51.3216	0.372682
Late Farmers*	I6755	I6755	England_N_all.SG	BraceDiekmannNatureEcologyEvolution2019	5528	M	54.0744	-2.28728
Late Farmers*	I6760	I6760	England_N_all.SG	BraceDiekmannNatureEcologyEvolution2019	5781	M	51.8434	-1.85044
Late Farmers*	I6762	I6762	England_N_all.SG	BraceDiekmannNatureEcologyEvolution2019	5700	M	51.5611	-1.44592
Late Farmers*	I4949	I4949_published	England_N_published	OlaldeNature2018	5417	M	51.445	-1.85261
Late Farmers*	I6757	I6757	England_N.SG	BraceDiekmannNatureEcologyEvolution2019	5493	M	54.0817	-2.27362
Late Farmers*	I6759	I6759	England_N.SG	OlaldeNature2018	5527	M	54.0744	-2.28728
Late Farmers*	I6761	I6761	England_N.SG	OlaldeNature2018	5525	F	50.829	-0.112825
Late Farmers*	BERG02-2	BERG02-2.SG	France_GrandEst_MN.SG	BrunelPNAS2020	5867	F	43.2182	2.4127
Late Farmers*	PSS4693	PSS4693.SG	France_GrandEst_MN.SG	BrunelPNAS2020	5396	F	48.5185	3.59633
Late Farmers*	WET370	WET370.SG	France_GrandEst_MN.SG	BrunelPNAS2020	5494	M	48.0578	7.3
Late Farmers*	ROUQCC	ROUQCC.SG	France_LaClape_LN_EMBA.SG	SeguinOrlandoCurrBio2021	5346	M	43.594	3.91929
Late Farmers*	ROUQEE	ROUQEE.SG	France_LaClape_LN_EMBA.SG	SeguinOrlandoCurrBio2021	5047	F	43.594	3.91929
Late Farmers*	ROUQFF	ROUQFF.SG	France_LaClape_LN_EMBA.SG	SeguinOrlandoCurrBio2021	5166	M	43.594	3.91929
Late Farmers*	ROUQHH	ROUQHH.SG	France_LaClape_LN_EMBA.SG	SeguinOrlandoCurrBio2021	5163	M	43.594	3.91929
Late Farmers*	ROUQV	ROUQV.SG	France_LaClape_LN_EMBA.SG	SeguinOrlandoCurrBio2021	5159	F	43.594	3.91929
Late Farmers*	ROUQW	ROUQW.SG	France_LaClape_LN_EMBA.SG	SeguinOrlandoCurrBio2021	5165	M	43.594	3.91929
Late Farmers*	FLR002	FLR002	France_MN	RivollatScienceAdvance2020	5972	M	49.19	-0.38
Late Farmers*	I4308	I4308	France_MN_1	OlaldeNature2018	5450	F	43.34	5.06
Late Farmers*	1H07	1H07.SG	France_MontAime_MLN.SG	SeguinOrlandoCurrBio2021	5166	M	48.8589	3.99647
Late Farmers*	1H14	1H14.SG	France_MontAime_MLN.SG	SeguinOrlandoCurrBio2021	5160	F	48.8589	3.99647
Late Farmers*	2H07	2H07.SG	France_MontAime_MLN.SG	SeguinOrlandoCurrBio2021	5184	M	48.8585	3.99589
Late Farmers*	2HC51961131	2HC51961131.SG	France_MontAime_MLN.SG	SeguinOrlandoCurrBio2021	5161	M	48.8585	3.99589
Late Farmers*	I1563	I1563	Germany_Blatterhohle_MN	LipsonNature2017	5448	F	51.3583	7.55111
Late Farmers*	I1593	I1593	Germany_Blatterhohle_MN	LipsonNature2017	5527	M	51.3583	7.55111
Late Farmers*	I1594	I1594	Germany_Blatterhohle_MN	LipsonNature2017	5140	M	51.3583	7.55111
Late Farmers*	TGM008	TGM008	Germany_LN_lc	RivollatScienceAdvance2020	5107	M	52.54	11.97
Late Farmers*	I0559	I0559	Germany_MN_Baalberge	MathiesonNature2015 (1240k of same same sample with 390k in HaakLazaridis2015)	5530	M	51.792	11.142
Late Farmers*	I0560	I0560	Germany_MN_Baalberge	MathiesonNature2015 (1240k of same same sample with 390k in HaakLazaridis2015)	5471	F	51.792	11.142
Late Farmers*	I0807	I0807	Germany_MN_Baalberge	MathiesonNature2015 (1240k of same same sample with 390k in HaakLazaridis2015)	5799	M	51.42	11.68
Late Farmers*	I0172	I0172	Germany_MN_Esperstedt	MathiesonNature2015 (1240k of same same sample with 390k in HaakLazaridis2015)	5155	M	51.42	11.68
Late Farmers*	I0551	I0551	Germany_MN_Salzmuende	MathiesonNature2015	5163	M	51.5331	11.8331
Late Farmers*	I0800	I0800	Germany_MN_Salzmuende	LipsonNature2017	5164	F	51.5331	11.8331
Late Farmers*	I0802	I0802	Germany_MN_Salzmuende	LipsonNature2017	5163	M	51.5331	11.8331
Late Farmers*	I2318	I2318	Greece_Peloponnese_N	MathiesonNature2018	5935	F	37.4233	23.1322
Late Farmers*	I3709	I3709	Greece_Peloponnese_N	MathiesonNature2018	5860	F	36.6383	22.3825
Late Farmers*	I3920	I3920	Greece_Peloponnese_N	MathiesonNature2018	5734	F	36.6383	22.3825
Late Farmers*	I1497	I1497	Hungary_LateC_Baden	MathiesonNature2015 (capture of same sample shotgunned in Gamba2014)	5019	F	47.167	19.833
Late Farmers*	I2369	I2369	Hungary_LateC_Baden	LipsonNature2017	5186	M	47.6209	19.0449
Late Farmers*	I2370	I2370	Hungary_LateC_Baden	LipsonNature2017	5122	F	47.3188	19.1669
Late Farmers*	I2371	I2371	Hungary_LateC_Baden	LipsonNature2017	5169	M	47.3188	19.1669
Late Farmers*	I2752	I2752	Hungary_LateC_Baden	LipsonNature2017	5175	M	46.7847	17.7317
Late Farmers*	I2753	I2753	Hungary_LateC_Baden	LipsonNature2017	5085	M	46.7847	17.7317
Late Farmers*	I2754	I2754	Hungary_LateC_Baden	LipsonNature2017	5140	M	46.7847	17.7317
Late Farmers*	I2755	I2755	Hungary_LateC_Baden	LipsonNature2017	5175	M	46.7847	17.7317
Late Farmers*	I2763	I2763	Hungary_LateC_Baden	LipsonNature2017	5172	F	46.6658	17.2708
Late Farmers*	I2785	I2785	Hungary_LateC_Baden	LipsonNature2017	5175	F	47.685	19.9184
Late Farmers*	I2366	I2366_published	Hungary_LateC_Baden_published	LipsonNature2017	5118	M	47.6209	19.0449
Late Farmers*	I2367	I2367_published	Hungary_LateC_Baden_published	LipsonNature2017	5085	M	47.6209	19.0449
Late Farmers*	I5116	I5116	Hungary_LateC_EBA_Baden_Yamnaya	OlaldeNature2018	5100	F	47.8099	20.8893
Late Farmers*	I5118	I5118	Hungary_LateC_EBA_Baden_Yamnaya	OlaldeNature2018	5100	M	47.8099	20.8893
Late Farmers*	I5119	I5119	Hungary_LateC_EBA_Baden_Yamnaya	OlaldeNature2018	5097	F	47.8099	20.8893
Late Farmers*	I2788	I2788	Hungary_LateC_Protoboleraz	LipsonNature2017	5685	M	47.1891	20.0048
Late Farmers*	I2789	I2789	Hungary_LateC_Protoboleraz	LipsonNature2017	5650	M	47.1891	20.0048
Late Farmers*	I2790	I2790_published	Hungary_LateC_Protoboleraz_published	LipsonNature2017	5625	F	47.1891	20.0048
Late Farmers*	I2791	I2791_published	Hungary_LateC_Protoboleraz_published	LipsonNature2017	5523	M	47.1891	20.0048
Late Farmers*	ASH3	ASH3.SG	Ireland_EN_MN.SG	CassidyNature2020	5609	M	52.9311	-8.18743
Late Farmers*	PB357	PB357.SG	Ireland_EN_MN.SG	CassidyNature2020	5545	F	52.9855	-9.11145
Late Farmers*	PN02	PN02.SG	Ireland_EN_MN.SG	CassidyNature2020	5546	M	53.0487	-9.14005
Late Farmers*	PN112	PN112.SG	Ireland_EN_MN.SG	CassidyNature2020	5558	M	53.0487	-9.14005
Late Farmers*	PN13	PN13.SG	Ireland_EN_MN.SG	CassidyNature2020	5572	M	53.0487	-9.14005
Late Farmers*	PN04	PN04.SG	Ireland_EN.SG	CassidyNature2020	5742	M	53.0487	-9.14005
Late Farmers*	PN05	PN05.SG	Ireland_EN.SG	CassidyNature2020	5729	M	53.0487	-9.14005
Late Farmers*	PN10_PN113	PN10_PN113.SG	Ireland_EN.SG	CassidyNature2020	5746	F	53.0487	-9.14005
Late Farmers*	PN107	PN107.SG	Ireland_EN.SG	CassidyNature2020	5705	M	53.0487	-9.14005
Late Farmers*	car004	car004-ALL_DATA.SG	Ireland_Megalithic.SG	SanchezQuintoPNAS2019	5517	M	54.251	-8.519
Late Farmers*	prs002	prs002-ALL_DATA.SG	Ireland_Megalithic.SG	SanchezQuintoPNAS2019	5665	F	54.2469	-8.55609
Late Farmers*	prs010	prs010-ALL_DATA.SG	Ireland_Megalithic.SG	SanchezQuintoPNAS2019	5522	M	54.2469	-8.55609
Late Farmers*	prs012	prs012-ALL_DATA.SG	Ireland_Megalithic.SG	SanchezQuintoPNAS2019	5650	M	54.2469	-8.55609
Late Farmers*	prs016	prs016-ALL_DATA.SG	Ireland_Megalithic.SG	SanchezQuintoPNAS2019	5539	M	54.2469	-8.55609
Late Farmers*	prs018	prs018-ALL_DATA.SG	Ireland_Megalithic.SG	SanchezQuintoPNAS2019	5643	M	54.2469	-8.55609
Late Farmers*	ANN1	ANN1.SG	Ireland_MN.SG	CassidyNature2020	5405	M	52.6764	-8.45533
Late Farmers*	ANN2	ANN2.SG	Ireland_MN.SG	CassidyNature2020	5521	M	52.6764	-8.45533
Late Farmers*	ARD2	ARD2.SG	Ireland_MN.SG	CassidyNature2020	5401	M	52.935	-8.15417
Late Farmers*	ASH1	ASH1.SG	Ireland_MN.SG	CassidyNature2020	5501	M	52.9311	-8.18743
Late Farmers*	BG72	BG72.SG	Ireland_MN.SG	CassidyNature2020	5467	M	52.8074	-6.82331
Late Farmers*	CH448	CH448.SG	Ireland_MN.SG	CassidyNature2020	5517	M	54.0548	-7.02675
Late Farmers*	GNM1007	GNM1007.SG	Ireland_MN.SG	CassidyNature2020	5288	M	53.9697	-9.632
Late Farmers*	GNM1076	GNM1076.SG	Ireland_MN.SG	CassidyNature2020	5135	M	53.9697	-9.632
Late Farmers*	MB6	MB6.SG	Ireland_MN.SG	CassidyNature2020	5192	M	54.3638	-5.48603
Late Farmers*	NG10	NG10.SG	Ireland_MN.SG	CassidyNature2020	5151	M	53.6948	-6.4757
Late Farmers*	NGZ1	NGZ1.SG	Ireland_MN.SG	CassidyNature2020	5024	F	53.6953	-6.4751
Late Farmers*	PB1327	PB1327.SG	Ireland_MN.SG	CassidyNature2020	5407	M	52.9855	-9.11145
Late Farmers*	PB1794	PB1794.SG	Ireland_MN.SG	CassidyNature2020	5486	F	52.9855	-9.11145
Late Farmers*	PB186	PB186.SG	Ireland_MN.SG	CassidyNature2020	5393	M	52.9855	-9.11145
Late Farmers*	PB2031	PB2031.SG	Ireland_MN.SG	CassidyNature2020	5431	M	52.9855	-9.11145
Late Farmers*	PB443	PB443.SG	Ireland_MN.SG	CassidyNature2020	5474	M	52.9855	-9.11145
Late Farmers*	PB581	PB581.SG	Ireland_MN.SG	CassidyNature2020	5413	M	52.9855	-9.11145
Late Farmers*	PB672	PB672.SG	Ireland_MN.SG	CassidyNature2020	5442	M	52.9855	-9.11145
Late Farmers*	PB675	PB675.SG	Ireland_MN.SG	CassidyNature2020	5171	M	52.9855	-9.11145
Late Farmers*	PB754	PB754.SG	Ireland_MN.SG	CassidyNature2020	5375	F	52.9855	-9.11145
Late Farmers*	PB768	PB768.SG	Ireland_MN.SG	CassidyNature2020	5475	M	52.9855	-9.11145
Late Farmers*	PN03	PN03.SG	Ireland_MN.SG	CassidyNature2020	5460	M	53.0487	-9.14005
Late Farmers*	PN06	PN06.SG	Ireland_MN.SG	CassidyNature2020	5459	M	53.0487	-9.14005
Late Farmers*	PN07	PN07.SG	Ireland_MN.SG	CassidyNature2020	5410	M	53.0487	-9.14005
Late Farmers*	PN12	PN12.SG	Ireland_MN.SG	CassidyNature2020	5383	M	53.0487	-9.14005
Late Farmers*	PN16	PN16.SG	Ireland_MN.SG	CassidyNature2020	5442	F	53.0487	-9.14005
Late Farmers*	RISE487	RISE487.SG	Italy_North_Remedello_C.SG	AllentoftNature2015	5207	M	45.26	10.379
Late Farmers*	FIL004	FIL004	Italy_Sardinia_C	MarcusNatureCommunications2020	5155	F	40.2781	8.76917
Late Farmers*	I15945	I15945	Italy_Sardinia_N	FernandesNatureEcologyEvolution2020	5825	F	40.6267	8.32306
Late Farmers*	I15946	I15946	Italy_Sardinia_N	FernandesNatureEcologyEvolution2020	5968	M	40.6267	8.32306
Late Farmers*	I16165	I16165	Italy_Sardinia_N	FernandesNatureEcologyEvolution2020	5671	F	40.4106	8.63972
Late Farmers*	I16166	I16166	Italy_Sardinia_N	FernandesNatureEcologyEvolution2020	5746	M	40.4106	8.63972
Late Farmers*	I16168	I16168	Italy_Sardinia_N	FernandesNatureEcologyEvolution2020	5807	M	40.6267	8.32306
Late Farmers*	I16183	I16183	Italy_Sardinia_N	FernandesNatureEcologyEvolution2020	5164	F	40.6267	8.32306
Late Farmers*	SUC008	SUC008	Italy_Sardinia_N	MarcusNatureCommunications2020	5817	F	40.8103	8.44418
Late Farmers*	I15944	I15944_d	Italy_Sardinia_N_lc	FernandesNatureEcologyEvolution2020	5575	M	40.6267	8.32306
Late Farmers*	I15943	I15943_published	Italy_Sardinia_N_published	FernandesNatureEcologyEvolution2020	5723	F	40.6267	8.32306
Late Farmers*	I2434	I2434	Poland_Globular_Amphora	MathiesonNature2018	5050	F	52.85	17.8833
Late Farmers*	I2441	I2441	Poland_Globular_Amphora	MathiesonNature2018	5050	M	52.85	17.8833
Late Farmers*	I2405	I2405_published	Poland_Globular_Amphora_published	MathiesonNature2018	5132	M	52.85	17.8833
Late Farmers*	N18	N18.SG	Poland_TRB.SG	FernandesScientificReports2018	5459	F	52.62	18.96
Late Farmers*	N20	N20.SG	Poland_TRB.SG	FernandesScientificReports2018	5467	M	52.62	18.96
Late Farmers*	I11599	I11599	Portugal_C	OlaldeScience2019	5050	M	39.1108	-8.66358
Late Farmers*	I11601	I11601	Portugal_C	OlaldeScience2019	5050	F	39.1108	-8.66358
Late Farmers*	I5076	I5076	Portugal_C	OlaldeScience2019	5146	F	37.1968	-8.58855
Late Farmers*	I5428	I5428	Portugal_C	OlaldeScience2019	5165	M	39.6241	-9.04719
Late Farmers*	CabecoArruda117B	CabecoArruda117B.SG	Portugal_C.SG	MartinianoPLoSGenetics2017	5050	M	39.1108	-8.66358
Late Farmers*	I11600	CabecoArruda122A.SG	Portugal_C.SG	MartinianoPLoSGenetics2017	5050	M	39.1108	-8.66358
Late Farmers*	DolmenAnsiao96B	DolmenAnsiao96B.SG	Portugal_LN_C.SG	MartinianoPLoSGenetics2017	5450	M	39.9167	-8.43333
Late Farmers*	LugarCanto41	LugarCanto41.SG	Portugal_MN.SG	MartinianoPLoSGenetics2017	5950	F	39.414	-8.822
Late Farmers*	LugarCanto42	LugarCanto42.SG	Portugal_MN.SG	MartinianoPLoSGenetics2017	5950	F	39.414	-8.822
Late Farmers*	LugarCanto44	LugarCanto44.SG	Portugal_MN.SG	MartinianoPLoSGenetics2017	5950	F	39.414	-8.822
Late Farmers*	LugarCanto45	LugarCanto45.SG	Portugal_MN.SG	MartinianoPLoSGenetics2017	5950	M	39.414	-8.822
Late Farmers*	I4089	I4089	Romania_C_Bodrogkeresztur	MathiesonNature2018	5636	M	47.7467	22.395
Late Farmers*	bal004	bal004.SG	Scotland_Megalithic.SG	SanchezQuintoPNAS2019	5186	F	57.757	-3.91195
Late Farmers*	lai001	lai001.SG	Scotland_Megalithic.SG	SanchezQuintoPNAS2019	5178	M	59.053	-2.853
Late Farmers*	mid001	mid001.SG	Scotland_Megalithic.SG	SanchezQuintoPNAS2019	5173	M	59.1576	-3.10046
Late Farmers*	mid002	mid002.SG	Scotland_Megalithic.SG	SanchezQuintoPNAS2019	5410	M	59.1576	-3.10046
Late Farmers*	I2633	I2633	Scotland_N	OlaldeNature2018	5639	F	58.53	-3.603
Late Farmers*	I2634	I2634	Scotland_N	OlaldeNature2018	5567	M	58.54	-3.598
Late Farmers*	I2635	I2635	Scotland_N	OlaldeNature2018	5523	M	58.53	-3.603
Late Farmers*	I2636	I2636	Scotland_N	OlaldeNature2018	5397	F	59.35	-2.873
Late Farmers*	I2637	I2637	Scotland_N	OlaldeNature2018	5375	M	59.35	-2.873
Late Farmers*	I2650	I2650	Scotland_N	OlaldeNature2018	5380	M	59.35	-2.873
Late Farmers*	I2651	I2651	Scotland_N	OlaldeNature2018	5160	F	59.35	-2.873
Late Farmers*	I2657	I2657	Scotland_N	OlaldeNature2018	5814	M	56.42	-5.472
Late Farmers*	I2659	I2659	Scotland_N	OlaldeNature2018	5637	F	56.41	-5.471
Late Farmers*	I2934	I2934	Scotland_N	OlaldeNature2018	5138	F	58.74	-2.916
Late Farmers*	I2935	I2935	Scotland_N	OlaldeNature2018	5115	M	58.74	-2.916
Late Farmers*	I2978	I2978	Scotland_N	OlaldeNature2018	5140	M	58.74	-2.916
Late Farmers*	I2979	I2979	Scotland_N	OlaldeNature2018	5104	M	58.74	-2.916
Late Farmers*	I2980	I2980	Scotland_N	OlaldeNature2018	5173	F	59.3101	-2.94071
Late Farmers*	I2988	I2988	Scotland_N	OlaldeNature2018	5397	F	55.4	-5.2
Late Farmers*	I3085	I3085	Scotland_N	OlaldeNature2018	5149	F	58.74	-2.916
Late Farmers*	I3133	I3133	Scotland_N	OlaldeNature2018	5446	M	56.4033	-5.47806
Late Farmers*	I3134	I3134	Scotland_N	OlaldeNature2018	5461	M	56.4033	-5.47806
Late Farmers*	I3136	I3136	Scotland_N	OlaldeNature2018	5397	F	56.4033	-5.47806
Late Farmers*	I5370	I5370	Scotland_N	OlaldeNature2018	5600	F	56.4146	-5.46918
Late Farmers*	I5371	I5371	Scotland_N	OlaldeNature2018	5600	F	56.4146	-5.46918
Late Farmers*	I7554	I7554	Scotland_N	OlaldeNature2018	5182	M	58.9863	-3.249
Late Farmers*	I2660	I2660	Scotland_N_mediumlowEEF	OlaldeNature2018	5394	M	56.41	-5.471
Late Farmers*	I2691	I2691	Scotland_N_mediumlowEEF	OlaldeNature2018	5613	M	56.41	-5.471
Late Farmers*	I3135	I3135	Scotland_N_mediumlowEEF	OlaldeNature2018	5517	M	56.4033	-5.47806
Late Farmers*	I3041	I3041	Scotland_N_mediumlowEEF_all.SG	BraceDiekmannNatureEcologyEvolution2019	5440	M	56.4146	-5.46918
Late Farmers*	I2796	I2796_published	Scotland_N_published	OlaldeNature2018	5571	M	59.3101	-2.94071
Late Farmers*	I3137	I3137_published	Scotland_N_published	OlaldeNature2018	5350	M	56.4033	-5.47806
Late Farmers*	I6764	I6764	Scotland_N.SG	BraceDiekmannNatureEcologyEvolution2019	5100	F	57.9073	-3.99683
Late Farmers*	I6766	I6766	Scotland_N.SG	BraceDiekmannNatureEcologyEvolution2019	5100	F	57.9073	-3.99683
Late Farmers*	I1838	I1838	Spain_C	LipsonNature2017	5126	F	42.63	-2.7
Late Farmers*	I8566	I8566	Spain_C	OlaldeScience2019	5100	F	38.8245	-0.864165
Late Farmers*	por002	por002.SG	Spain_C.SG	ValdioseraPNAS2018	5111	M	42.3527	-3.51832
Late Farmers*	c40331	c40331.SG	Spain_LN.SG	ValdioseraPNAS2018	5630	M	37.455	-4.33238
Late Farmers*	san216	san216.SG	Spain_LN.SG	ValdioseraPNAS2018	5657	M	42.3171	0.364418
Late Farmers*	ELT002	ELT002_merged	Spain_MLN	VillalbaMoucoCurrentBiology2019	5753	M	42.5	0.5
Late Farmers*	ELT006	ELT006_merged	Spain_MLN	VillalbaMoucoCurrentBiology2019	5809	M	42.5	0.5
Late Farmers*	I0405	I0405	Spain_MLN	MathiesonNature2015 (1240k of same same sample with 390k in HaakLazaridis2015)	5700	M	41.2522	-2.32622
Late Farmers*	I0406	I0406	Spain_MLN	MathiesonNature2015 (1240k of same same sample with 390k in HaakLazaridis2015)	5700	M	41.2522	-2.32622
Late Farmers*	I0407	I0407	Spain_MLN	MathiesonNature2015 (1240k of same same sample with 390k in HaakLazaridis2015)	5700	F	41.2522	-2.32622
Late Farmers*	I0408	I0408	Spain_MLN	MathiesonNature2015 (1240k of same same sample with 390k in HaakLazaridis2015)	5686	F	41.2522	-2.32622
Late Farmers*	I11248	I11248	Spain_MLN	OlaldeScience2019	5050	M	43.0866	-2.2154
Late Farmers*	I11249	I11249	Spain_MLN	OlaldeScience2019	5050	M	43.0866	-2.2154
Late Farmers*	I11300	I11300	Spain_MLN	OlaldeScience2019	5050	F	43.0866	-2.2154
Late Farmers*	I11301	I11301	Spain_MLN	OlaldeScience2019	5050	F	43.0866	-2.2154
Late Farmers*	I3214	I3214	Spain_MLN	OlaldeScience2019	5200	M	43.4102	-5.98496
Late Farmers*	I7547	I7547	Spain_MLN	OlaldeScience2019	5950	F	36.445	-6.21
Late Farmers*	I7549	I7549	Spain_MLN	OlaldeScience2019	5950	F	36.445	-6.21
Late Farmers*	I7594	I7594	Spain_MLN	OlaldeScience2019	5396	F	38.7025	-0.48631
Late Farmers*	I7600	I7600	Spain_MLN	OlaldeScience2019	5625	F	38.7025	-0.48631
Late Farmers*	I7601	I7601	Spain_MLN	OlaldeScience2019	5527	M	38.7025	-0.48631
Late Farmers*	I7602	I7602	Spain_MLN	OlaldeScience2019	5050	M	43.0858	-2.2512
Late Farmers*	I7603	I7603	Spain_MLN	OlaldeScience2019	5050	M	43.0858	-2.2512
Late Farmers*	I7604	I7604	Spain_MLN	OlaldeScience2019	5050	M	43.0858	-2.2512
Late Farmers*	I7605	I7605	Spain_MLN	OlaldeScience2019	5050	M	43.0858	-2.2512
Late Farmers*	I7606	I7606	Spain_MLN	OlaldeScience2019	5050	M	43.0858	-2.2512
Late Farmers*	I7643	I7643	Spain_MLN	OlaldeScience2019	5803	M	38.7025	-0.48631
Late Farmers*	I7644	I7644	Spain_MLN	OlaldeScience2019	5521	M	38.7025	-0.48631
Late Farmers*	I7645	I7645	Spain_MLN	OlaldeScience2019	5845	M	38.7025	-0.48631
Late Farmers*	I7646	I7646	Spain_MLN	OlaldeScience2019	5613	F	38.7025	-0.48631
Late Farmers*	I7647	I7647	Spain_MLN	OlaldeScience2019	5945	M	38.7025	-0.48631
Late Farmers*	I8567	I8567	Spain_MLN	OlaldeScience2019	5350	M	38.7623	-0.586981
Late Farmers*	I3273	I3273_published	Spain_MLN_published	LipsonNature2017	5403	F	42.57	-2.55
Late Farmers*	I7679	I7679_published	Spain_MLN_published	OlaldeScience2019	5950	F	36.445	-6.21
Late Farmers*	ans003	ans003.SG	Sweden_Ansarve_Megalithic.SG	SanchezQuintoPNAS2019	5282	F	57.509	18.14
Late Farmers*	ans005	ans005.SG	Sweden_Ansarve_Megalithic.SG	SanchezQuintoPNAS2019	5367	F	57.509	18.14
Late Farmers*	ans008	ans008.SG	Sweden_Ansarve_Megalithic.SG	SanchezQuintoPNAS2019	5154	M	57.509	18.14
Late Farmers*	ans014	ans014.SG	Sweden_Ansarve_Megalithic.SG	SanchezQuintoPNAS2019	5111	M	57.509	18.14
Late Farmers*	ans017	ans017.SG	Sweden_Ansarve_Megalithic.SG	SanchezQuintoPNAS2019	5053	M	57.509	18.14
Late Farmers*	ros3	ros3.SG	Sweden_FBC.SG	MalmstromProcBiolSci2019	5084	F	58.1833	13.65
Late Farmers*	MX150	MX150	Switzerland_LN	FurtwanglerNatureCommunications2020	5164	M	47.2621	7.65984
Late Farmers*	MX182	MX182	Switzerland_LN	FurtwanglerNatureCommunications2020	5158	M	47.2621	7.65984
Late Farmers*	MX212	MX212	Switzerland_LN	FurtwanglerNatureCommunications2020	5165	M	47.2621	7.65984
Late Farmers*	MX213	MX213	Switzerland_LN	FurtwanglerNatureCommunications2020	5125	M	47.2621	7.65984
Late Farmers*	RA42	RA42	Switzerland_LN	FurtwanglerNatureCommunications2020	5165	F	47.2621	7.65984
Late Farmers*	RA43	RA43	Switzerland_LN	FurtwanglerNatureCommunications2020	5122	F	47.2621	7.65984
Late Farmers*	I3023	I3023	Wales_N	BraceDiekmannNatureEcologyEvolution2019	5300	M	52.0349	-3.19357
Late Farmers*	I5359	I5359	Wales_N	OlaldeNature2018	5600	M	51.4514	-3.30787
Late Farmers*	I3033	I3033	Wales_N_all.SG	BraceDiekmannNatureEcologyEvolution2019	5533	F	51.6325	-4.6929
Late Farmers*	I6770	SB577A_lib.SG	Wales_N.SG	BraceDiekmannNatureEcologyEvolution2019	5200	F	53.3098	-3.37263
Late Farmers	KH180054	KH180054	Altendorf	ThisPublication	5500	F	..	..
Late Farmers	KH180055	KH180055	Altendorf	ThisPublication	5500	M	..	..
Late Farmers	KH180057	KH180057	Altendorf	ThisPublication	..	M	..	..
Late Farmers	KH180059	KH180059	Altendorf	ThisPublication	5500	M	..	..
Late Farmers	KH180131	KH180131	Altendorf	ThisPublication	5500	M	..	..
Late Farmers	KH180135_KH180136	KH180135_KH180136	Altendorf	ThisPublication	5500	M	..	..
Late Farmers	KH180137_KH182329	KH180137_KH182329	Altendorf	ThisPublication	..	M	..	..
Late Farmers	KH180138	KH180138	Altendorf	ThisPublication	..	M	..	..
Late Farmers	KH180149	KH180149	Altendorf	ThisPublication	5500	M	..	..
Late Farmers	KH180150_KH180151	KH180150_KH180151	Altendorf	ThisPublication	5500	M	..	..
Late Farmers	KH180152	KH180152	Altendorf	ThisPublication	5500	F	..	..
Late Farmers	KH180153	KH180153	Altendorf	ThisPublication	5500	F	..	..
Late Farmers	KH180158	KH180158	Altendorf	ThisPublication	..	F	..	..
Late Farmers	KH180159	KH180159	Altendorf	ThisPublication	5500	M	..	..
Late Farmers	KH180160_KH180161	KH180160_KH180161	Altendorf	ThisPublication	..	M	..	..
Late Farmers	KH150189_KH150632_KH150636	KH150189_KH150632_KH150636	Niedertiefenbach	Immel. 2021	5300	M	..	..
Late Farmers	KH150190	KH150190	Niedertiefenbach	Immel. 2021	5300	M	..	..
Late Farmers	KH150191	KH150191	Niedertiefenbach	Immel. 2021	5300	M	..	..
Late Farmers	KH150193_KH150286_KH150286	KH150193_KH150286_KH150286	Niedertiefenbach	Immel. 2021	5300	..	..	..
Late Farmers	KH150195_KH150196_KH150616	KH150195_KH150196_KH150616	Niedertiefenbach	Immel. 2021	5300	..	..	..
Late Farmers	KH150197	KH150197	Niedertiefenbach	Immel. 2021	5300	M	..	..
Late Farmers	KH150198	KH150198	Niedertiefenbach	Immel. 2021	5300	M	..	..
Late Farmers	KH150200	KH150200	Niedertiefenbach	Immel. 2021	5300	..	..	..
Late Farmers	KH150203	KH150203	Niedertiefenbach	Immel. 2021	5300	..	..	..
Late Farmers	KH150204_KH150634	KH150204_KH150634	Niedertiefenbach	Immel. 2021	5300	M	..	..
Late Farmers	KH150208_KH150208_KH150210	KH150208_KH150208_KH150210	Niedertiefenbach	Immel. 2021	5300	..	..	..
Late Farmers	KH150287	KH150287	Niedertiefenbach	Immel. 2021	5300	M	..	..
Late Farmers	KH150289	KH150289	Niedertiefenbach	Immel. 2021	5300	M	..	..
Late Farmers	KH150290	KH150290	Niedertiefenbach	Immel. 2021	5300	..	..	..
Late Farmers	KH150417	KH150417	Niedertiefenbach	Immel. 2021	5300	M	..	..
Late Farmers	KH150418	KH150418	Niedertiefenbach	Immel. 2021	5300	M	..	..
Late Farmers	KH150419	KH150419	Niedertiefenbach	Immel. 2021	5300	..	..	..
Late Farmers	KH150422	KH150422	Niedertiefenbach	Immel. 2021	5300	M	..	..
Late Farmers	KH150610	KH150610	Niedertiefenbach	Immel. 2021	5300	F	..	..
Late Farmers	KH150612	KH150612	Niedertiefenbach	Immel. 2021	5300	M	..	..
Late Farmers	KH150613_KH180043	KH150613_KH180043	Niedertiefenbach	Immel. 2021	5300	M	..	..
Late Farmers	KH150614_KH150615	KH150614_KH150615	Niedertiefenbach	Immel. 2021	5300	M	..	..
Late Farmers	KH150618	KH150618	Niedertiefenbach	Immel. 2021	5300	M	..	..
Late Farmers	KH150619	KH150619	Niedertiefenbach	Immel. 2021	5300	F	..	..
Late Farmers	KH150620	KH150620	Niedertiefenbach	Immel. 2021	5300	M	..	..
Late Farmers	KH150621	KH150621	Niedertiefenbach	Immel. 2021	5300	M	..	..
Late Farmers	KH150622	KH150622	Niedertiefenbach	Immel. 2021	5300	F	..	..
Late Farmers	KH150623	KH150623	Niedertiefenbach	Immel. 2021	5300	M	..	..
Late Farmers	KH150625	KH150625	Niedertiefenbach	Immel. 2021	5300	F	..	..
Late Farmers	KH150626	KH150626	Niedertiefenbach	Immel. 2021	5300	F	..	..
Late Farmers	KH150627	KH150627	Niedertiefenbach	Immel. 2021	5300	F	..	..
Late Farmers	KH150628	KH150628	Niedertiefenbach	Immel. 2021	5300	M	..	..
Late Farmers	KH150629	KH150629	Niedertiefenbach	Immel. 2021	5300	M	..	..
Late Farmers	KH150630	KH150630	Niedertiefenbach	Immel. 2021	5300	M	..	..
Late Farmers	KH150633	KH150633	Niedertiefenbach	Immel. 2021	5300	M	..	..
Late Farmers	KH150635	KH150635	Niedertiefenbach	Immel. 2021	5300	F	..	..
Late Farmers	KH150637	KH150637	Niedertiefenbach	Immel. 2021	5300	M	..	..
Late Farmers	KH150639	KH150639	Niedertiefenbach	Immel. 2021	5300	M	..	..
Late Farmers	KH150640	KH150640	Niedertiefenbach	Immel. 2021	5300	F	..	..
Late Farmers	KH150641	KH150641	Niedertiefenbach	Immel. 2021	5300	M	..	..
Late Farmers	KH180044	KH180044	Niedertiefenbach	Immel. 2021	5300	F	..	..
Late Farmers	KH180045	KH180045	Niedertiefenbach	Immel. 2021	5300	F	..	..
Late Farmers	KH150186	KH150186	Niedertiefenbach	ThisPublication	5300	..	..	..
Late Farmers	KH150187	KH150187	Niedertiefenbach	ThisPublication	5300	..	..	..
Late Farmers	KH150192	KH150192	Niedertiefenbach	ThisPublication	5300	..	..	..
Late Farmers	KH150194	KH150194	Niedertiefenbach	ThisPublication	5300	..	..	..
Late Farmers	KH150199	KH150199	Niedertiefenbach	ThisPublication	5300	M	..	..
Late Farmers	KH150201	KH150201	Niedertiefenbach	ThisPublication	5300	..	..	..
Late Farmers	KH150202	KH150202	Niedertiefenbach	ThisPublication	5300	..	..	..
Late Farmers	KH150205	KH150205	Niedertiefenbach	ThisPublication	5300	..	..	..
Late Farmers	KH150206	KH150206	Niedertiefenbach	ThisPublication	5300	..	..	..
Late Farmers	KH150207	KH150207	Niedertiefenbach	ThisPublication	5300	..	..	..
Late Farmers	KH150209	KH150209	Niedertiefenbach	ThisPublication	5300	..	..	..
Late Farmers	KH150288	KH150288	Niedertiefenbach	ThisPublication	5300	M	..	..
Late Farmers	KH150291	KH150291	Niedertiefenbach	ThisPublication	5300	..	..	..
Late Farmers	KH150292	KH150292	Niedertiefenbach	ThisPublication	5300	..	..	..
Late Farmers	KH150293	KH150293	Niedertiefenbach	ThisPublication	5300	..	..	..
Late Farmers	KH150294	KH150294	Niedertiefenbach	ThisPublication	5300	M	..	..
Late Farmers	KH150295	KH150295	Niedertiefenbach	ThisPublication	5300	..	..	..
Late Farmers	KH150420	KH150420	Niedertiefenbach	ThisPublication	5300	..	..	..
Late Farmers	KH150423	KH150423	Niedertiefenbach	ThisPublication	5300	..	..	..
Late Farmers	KH150424	KH150424	Niedertiefenbach	ThisPublication	5300	..	..	..
Late Farmers	KH150427	KH150427	Niedertiefenbach	ThisPublication	5300	..	..	..
Late Farmers	KH150428	KH150428	Niedertiefenbach	ThisPublication	5300	..	..	..
Late Farmers	KH150429	KH150429	Niedertiefenbach	ThisPublication	5300	..	..	..
Late Farmers	KH150430	KH150430	Niedertiefenbach	ThisPublication	5300	..	..	..
Late Farmers	KH150431	KH150431	Niedertiefenbach	ThisPublication	5300	..	..	..
Late Farmers	KH150432	KH150432	Niedertiefenbach	ThisPublication	5300	F	..	..
Late Farmers	KH150433	KH150433	Niedertiefenbach	ThisPublication	5300	M	..	..
Late Farmers	KH150434	KH150434	Niedertiefenbach	ThisPublication	5300	..	..	..
Late Farmers	KH150435	KH150435	Niedertiefenbach	ThisPublication	5300	F	..	..
Late Farmers	KH150436	KH150436	Niedertiefenbach	ThisPublication	5300	F	..	..
Late Farmers	KH150611	KH150611	Niedertiefenbach	ThisPublication	5300	M	..	..
Late Farmers	KH150617	KH150617	Niedertiefenbach	ThisPublication	5300	M	..	..
Late Farmers	KH150624	KH150624	Niedertiefenbach	ThisPublication	5300	..	..	..
Late Farmers	KH150631	KH150631	Niedertiefenbach	ThisPublication	5300	..	..	..
Late Farmers	KH180046	KH180046	Niedertiefenbach	ThisPublication	5300	..	..	..
Late Farmers	NTB001	NTB001	Niedertiefenbach	ThisPublication	5300	M	..	..
Late Farmers	NTB002	NTB002	Niedertiefenbach	ThisPublication	5300	M	..	..
Late Farmers	NTB003	NTB003	Niedertiefenbach	ThisPublication	5300	..	..	..
Late Farmers	NTB004	NTB004	Niedertiefenbach	ThisPublication	5300	M	..	..
Late Farmers	NTB005	NTB005	Niedertiefenbach	ThisPublication	5300	M	..	..
Late Farmers	NTB006	NTB006	Niedertiefenbach	ThisPublication	5300	..	..	..
Late Farmers	NTB007	NTB007	Niedertiefenbach	ThisPublication	5300	M	..	..
Late Farmers	NTB008	NTB008	Niedertiefenbach	ThisPublication	5300	..	..	..
Late Farmers	NTB009	NTB009	Niedertiefenbach	ThisPublication	5300	..	..	..
Late Farmers	NTB010	NTB010	Niedertiefenbach	ThisPublication	5300	..	..	..
Late Farmers	NTB011	NTB011	Niedertiefenbach	ThisPublication	5300	F	..	..
Late Farmers	NTB012	NTB012	Niedertiefenbach	ThisPublication	5300	..	..	..
Late Farmers	KH180390	KH180390	Rimbeck	ThisPublication	5500	F	..	..
Late Farmers	KH180391	KH180391	Rimbeck	ThisPublication	5500	..	..	..
Late Farmers	KH180392	KH180392	Rimbeck	ThisPublication	5500	M	..	..
Late Farmers	KH180066	KH180066	Warburg	ThisPublication	5500	M	..	..
Late Farmers	KH180068	KH180068	Warburg	ThisPublication	5500	..	..	..
Late Farmers	KH180070	KH180070	Warburg	ThisPublication	5500	M	..	..
Late Farmers	KH180071	KH180071	Warburg	ThisPublication	5500	M	..	..
Late Farmers	KH180075	KH180075	Warburg	ThisPublication	5500	..	..	..
Late Farmers	KH180077_KH180078	KH180077_KH180078	Warburg	ThisPublication	5500	M	..	..
Late Farmers	KH180079	KH180079	Warburg	ThisPublication	5500	..	..	..
Late Farmers	KH180086_KH180087	KH180086_KH180087	Warburg	ThisPublication	5500	M	..	..
Late Farmers	KH180090_KH180091	KH180090_KH180091	Warburg	ThisPublication	5500	M	..	..
Late Farmers	KH180095	KH180095	Warburg	ThisPublication	5500	F	..	..
Late Farmers	KH180096	KH180096	Warburg	ThisPublication	5500	..	..	..
Late Farmers	KH180097	KH180097	Warburg	ThisPublication	5500	..	..	..
Late Farmers	KH180099	KH180099	Warburg	ThisPublication	5500	..	..	..
Late Farmers	KH180102	KH180102	Warburg	ThisPublication	5500	..	..	..
Late Farmers	KH180120	KH180120	Warburg	ThisPublication	5500	F	..	..
Late Farmers	KH180121	KH180121	Warburg	ThisPublication	5500	M	..	..
Late Farmers	KH180122_KH180126	KH180122_KH180126	Warburg	ThisPublication	5500	M	..	..
Late Farmers	KH180123	KH180123	Warburg	ThisPublication	5500	F	..	..
Middle Ages*	I4137	RISE569.SG	Czech_EarlySlav_dup.I4137.SG	AllentoftNature2015	1229	F	50.19	14.158
Middle Ages*	I5026	RISE568.SG	Czech_EarlySlav.SG	AllentoftNature2015	1200	F	50.19	14.158
Middle Ages*	VK296	VK296.SG	Denmark_EarlyViking.SG	MargaryanWillerslevNature2020	1230	M	55.15	11.87
Middle Ages*	VK297	VK297.SG	Denmark_EarlyViking.SG	MargaryanWillerslevNature2020	1200	M	55.15	11.87
Middle Ages*	VK65	VK65.SG	Denmark_EarlyViking.SG	MargaryanWillerslevNature2020	1100	F	55.87	12.08
Middle Ages*	VK69	VK69.SG	Denmark_EarlyViking.SG	MargaryanWillerslevNature2020	1100	F	55.87	12.08
Middle Ages*	VK70	VK70.SG	Denmark_EarlyViking.SG	MargaryanWillerslevNature2020	1100	M	55.87	12.08
Middle Ages*	VK71	VK71.SG	Denmark_EarlyViking.SG	MargaryanWillerslevNature2020	1100	M	55.87	12.08
Middle Ages*	VK140	VK140.SG	Denmark_Viking_lc.SG	MargaryanWillerslevNature2020	1000	M	55.5	10.33
Middle Ages*	VK339	VK339.SG	Denmark_Viking_lc.SG	MargaryanWillerslevNature2020	1075	F	55.95	10.2
Middle Ages*	VK133	VK133.SG	Denmark_Viking.SG	MargaryanWillerslevNature2020	1050	M	55.5	10.33
Middle Ages*	VK138	VK138.SG	Denmark_Viking.SG	MargaryanWillerslevNature2020	1000	M	55.5	10.33
Middle Ages*	VK139	VK139.SG	Denmark_Viking.SG	MargaryanWillerslevNature2020	1000	M	55.5	10.33
Middle Ages*	VK141	VK141.SG	Denmark_Viking.SG	MargaryanWillerslevNature2020	1000	F	55.5	10.33
Middle Ages*	VK215	VK215.SG	Denmark_Viking.SG	MargaryanWillerslevNature2020	1100	M	55.73	12.12
Middle Ages*	VK247	VK247.SG	Denmark_Viking.SG	MargaryanWillerslevNature2020	1075	F	55.6	11.95
Middle Ages*	VK274	VK274.SG	Denmark_Viking.SG	MargaryanWillerslevNature2020	1000	M	54.85	10.78
Middle Ages*	VK275	VK275.SG	Denmark_Viking.SG	MargaryanWillerslevNature2020	1000	M	54.85	10.78
Middle Ages*	VK276	VK276.SG	Denmark_Viking.SG	MargaryanWillerslevNature2020	1000	F	54.85	10.78
Middle Ages*	VK278	VK278.SG	Denmark_Viking.SG	MargaryanWillerslevNature2020	1000	F	55.5	10.33
Middle Ages*	VK279	VK279.SG	Denmark_Viking.SG	MargaryanWillerslevNature2020	1000	M	55.5	10.33
Middle Ages*	VK280	VK280.SG	Denmark_Viking.SG	MargaryanWillerslevNature2020	1000	M	55.5	10.33
Middle Ages*	VK281	VK281.SG	Denmark_Viking.SG	MargaryanWillerslevNature2020	1000	M	55.13	11.95
Middle Ages*	VK282	VK282.SG	Denmark_Viking.SG	MargaryanWillerslevNature2020	1000	M	54.96	10.83
Middle Ages*	VK284	VK284.SG	Denmark_Viking.SG	MargaryanWillerslevNature2020	1000	F	55.65	12.14
Middle Ages*	VK285	VK285.SG	Denmark_Viking.SG	MargaryanWillerslevNature2020	1000	F	54.85	10.78
Middle Ages*	VK286	VK286.SG	Denmark_Viking.SG	MargaryanWillerslevNature2020	1000	M	54.87	10.72
Middle Ages*	VK287	VK287.SG	Denmark_Viking.SG	MargaryanWillerslevNature2020	1000	M	54.85	10.78
Middle Ages*	VK288	VK288.SG	Denmark_Viking.SG	MargaryanWillerslevNature2020	1000	F	54.87	10.72
Middle Ages*	VK289	VK289.SG	Denmark_Viking.SG	MargaryanWillerslevNature2020	1100	M	54.8	10.69
Middle Ages*	VK290	VK290.SG	Denmark_Viking.SG	MargaryanWillerslevNature2020	1000	M	54.89	10.74
Middle Ages*	VK291	VK291.SG	Denmark_Viking.SG	MargaryanWillerslevNature2020	1100	M	54.8	10.69
Middle Ages*	VK292	VK292.SG	Denmark_Viking.SG	MargaryanWillerslevNature2020	1000	M	54.87	10.72
Middle Ages*	VK294	VK294.SG	Denmark_Viking.SG	MargaryanWillerslevNature2020	1075	F	55.56	11.25
Middle Ages*	VK295	VK295.SG	Denmark_Viking.SG	MargaryanWillerslevNature2020	1000	M	55.51	10.45
Middle Ages*	VK298	VK298.SG	Denmark_Viking.SG	MargaryanWillerslevNature2020	1050	F	55.85	10.64
Middle Ages*	VK300	VK300.SG	Denmark_Viking.SG	MargaryanWillerslevNature2020	1075	F	55.95	10.2
Middle Ages*	VK301	VK301.SG	Denmark_Viking.SG	MargaryanWillerslevNature2020	1185	M	55.43	10.61
Middle Ages*	VK312	VK312.SG	Denmark_Viking.SG	MargaryanWillerslevNature2020	1075	F	55.05	10.53
Middle Ages*	VK313	VK313.SG	Denmark_Viking.SG	MargaryanWillerslevNature2020	1075	M	55.05	10.53
Middle Ages*	VK314	VK314.SG	Denmark_Viking.SG	MargaryanWillerslevNature2020	1075	F	55.05	10.53
Middle Ages*	VK315	VK315.SG	Denmark_Viking.SG	MargaryanWillerslevNature2020	1075	M	55.56	11.25
Middle Ages*	VK316	VK316.SG	Denmark_Viking.SG	MargaryanWillerslevNature2020	1000	M	55.51	10.45
Middle Ages*	VK319	VK319.SG	Denmark_Viking.SG	MargaryanWillerslevNature2020	1150	F	55.43	10.61
Middle Ages*	VK320	VK320.SG	Denmark_Viking.SG	MargaryanWillerslevNature2020	1000	M	54.87	10.72
Middle Ages*	VK322	VK322.SG	Denmark_Viking.SG	MargaryanWillerslevNature2020	934	F	55.33	8.76
Middle Ages*	VK323	VK323.SG	Denmark_Viking.SG	MargaryanWillerslevNature2020	1000	M	55.33	8.76
Middle Ages*	VK324	VK324.SG	Denmark_Viking.SG	MargaryanWillerslevNature2020	935	M	55.33	8.76
Middle Ages*	VK325	VK325.SG	Denmark_Viking.SG	MargaryanWillerslevNature2020	1145	F	55.33	8.76
Middle Ages*	VK326	VK326.SG	Denmark_Viking.SG	MargaryanWillerslevNature2020	1026	M	55.33	8.76
Middle Ages*	VK327	VK327.SG	Denmark_Viking.SG	MargaryanWillerslevNature2020	979	M	55.33	8.76
Middle Ages*	VK328	VK328.SG	Denmark_Viking.SG	MargaryanWillerslevNature2020	1104	F	55.33	8.76
Middle Ages*	VK329	VK329.SG	Denmark_Viking.SG	MargaryanWillerslevNature2020	1183	M	55.33	8.76
Middle Ages*	VK330	VK330.SG	Denmark_Viking.SG	MargaryanWillerslevNature2020	896	F	55.33	8.76
Middle Ages*	VK338	VK338.SG	Denmark_Viking.SG	MargaryanWillerslevNature2020	1000	M	54.87	10.72
Middle Ages*	VK340	VK340.SG	Denmark_Viking.SG	MargaryanWillerslevNature2020	1075	F	55.95	10.2
Middle Ages*	VK361	VK361.SG	Denmark_Viking.SG	MargaryanWillerslevNature2020	1000	F	54.87	10.72
Middle Ages*	VK362	VK362.SG	Denmark_Viking.SG	MargaryanWillerslevNature2020	1000	M	54.87	10.72
Middle Ages*	VK363	VK363.SG	Denmark_Viking.SG	MargaryanWillerslevNature2020	1000	M	54.87	10.72
Middle Ages*	VK364	VK364.SG	Denmark_Viking.SG	MargaryanWillerslevNature2020	1000	F	54.87	10.72
Middle Ages*	VK365	VK365.SG	Denmark_Viking.SG	MargaryanWillerslevNature2020	1000	M	54.87	10.72
Middle Ages*	VK366	VK366.SG	Denmark_Viking.SG	MargaryanWillerslevNature2020	1000	F	54.87	10.72
Middle Ages*	VK367	VK367.SG	Denmark_Viking.SG	MargaryanWillerslevNature2020	1000	M	54.87	10.72
Middle Ages*	VK368	VK368.SG	Denmark_Viking.SG	MargaryanWillerslevNature2020	1000	F	54.87	10.72
Middle Ages*	VK369	VK369.SG	Denmark_Viking.SG	MargaryanWillerslevNature2020	1075	M	55.56	11.25
Middle Ages*	VK370	VK370.SG	Denmark_Viking.SG	MargaryanWillerslevNature2020	1000	F	55.5	10.33
Middle Ages*	VK371	VK371.SG	Denmark_Viking.SG	MargaryanWillerslevNature2020	1065	F	55.5	10.33
Middle Ages*	VK372	VK372.SG	Denmark_Viking.SG	MargaryanWillerslevNature2020	1000	F	55.5	10.33
Middle Ages*	VK373	VK373.SG	Denmark_Viking.SG	MargaryanWillerslevNature2020	1000	M	55.5	10.33
Middle Ages*	VK383	VK383.SG	Denmark_Viking.SG	MargaryanWillerslevNature2020	1075	F	55.95	10.2
Middle Ages*	VK384	VK384.SG	Denmark_Viking.SG	MargaryanWillerslevNature2020	1075	M	55.95	10.2
Middle Ages*	VK385	VK385.SG	Denmark_Viking.SG	MargaryanWillerslevNature2020	1075	F	55.6	11.95
Middle Ages*	VK411	VK411.SG	Denmark_Viking.SG	MargaryanWillerslevNature2020	1000	M	55.5	10.33
Middle Ages*	VK445	VK445.SG	Denmark_Viking.SG	MargaryanWillerslevNature2020	1000	M	55.62	11.97
Middle Ages*	VK446	VK446.SG	Denmark_Viking.SG	MargaryanWillerslevNature2020	1000	M	55.5	10.33
Middle Ages*	VK84	VK84.SG	Denmark_Viking.SG	MargaryanWillerslevNature2020	1075	F	55.95	10.2
Middle Ages*	VK87	VK87.SG	Denmark_Viking.SG	MargaryanWillerslevNature2020	1075	M	55.95	10.2
Middle Ages*	VK90	VK90.SG	Denmark_Viking.SG	MargaryanWillerslevNature2020	1075	F	55.6	11.95
Middle Ages*	VK92	VK92.SG	Denmark_Viking.SG	MargaryanWillerslevNature2020	1075	F	55.6	11.95
Middle Ages*	VK94	VK94.SG	Denmark_Viking.SG	MargaryanWillerslevNature2020	1000	F	55.62	11.97
Middle Ages*	VK143	VK143.SG	England_Viking.SG	MargaryanWillerslevNature2020	1010	M	51.76	-1.26
Middle Ages*	VK144	VK144.SG	England_Viking.SG	MargaryanWillerslevNature2020	1010	M	51.76	-1.26
Middle Ages*	VK145	VK145.SG	England_Viking.SG	MargaryanWillerslevNature2020	1010	M	51.76	-1.26
Middle Ages*	VK146	VK146.SG	England_Viking.SG	MargaryanWillerslevNature2020	1010	M	51.76	-1.26
Middle Ages*	VK147	VK147.SG	England_Viking.SG	MargaryanWillerslevNature2020	1010	M	51.76	-1.26
Middle Ages*	VK148	VK148.SG	England_Viking.SG	MargaryanWillerslevNature2020	1010	M	51.76	-1.26
Middle Ages*	VK151	VK151.SG	England_Viking.SG	MargaryanWillerslevNature2020	1010	M	51.76	-1.26
Middle Ages*	VK163	VK163.SG	England_Viking.SG	MargaryanWillerslevNature2020	1010	M	51.76	-1.26
Middle Ages*	VK165	VK165.SG	England_Viking.SG	MargaryanWillerslevNature2020	1010	M	51.76	-1.26
Middle Ages*	VK166	VK166.SG	England_Viking.SG	MargaryanWillerslevNature2020	1010	M	51.76	-1.26
Middle Ages*	VK167	VK167.SG	England_Viking.SG	MargaryanWillerslevNature2020	1010	M	51.76	-1.26
Middle Ages*	VK168	VK168.SG	England_Viking.SG	MargaryanWillerslevNature2020	1010	M	51.76	-1.26
Middle Ages*	VK171	VK171.SG	England_Viking.SG	MargaryanWillerslevNature2020	945	F	53.3	-4.22
Middle Ages*	VK172	VK172.SG	England_Viking.SG	MargaryanWillerslevNature2020	1010	M	51.76	-1.26
Middle Ages*	VK173	VK173.SG	England_Viking.SG	MargaryanWillerslevNature2020	1010	M	51.76	-1.26
Middle Ages*	VK174	VK174.SG	England_Viking.SG	MargaryanWillerslevNature2020	1010	M	51.76	-1.26
Middle Ages*	VK175	VK175.SG	England_Viking.SG	MargaryanWillerslevNature2020	1010	M	51.76	-1.26
Middle Ages*	VK176	VK176.SG	England_Viking.SG	MargaryanWillerslevNature2020	1010	M	51.76	-1.26
Middle Ages*	VK177	VK177.SG	England_Viking.SG	MargaryanWillerslevNature2020	1010	M	51.76	-1.26
Middle Ages*	VK256	VK256.SG	England_Viking.SG	MargaryanWillerslevNature2020	953	M	50.67	-2.47
Middle Ages*	VK257	VK257.SG	England_Viking.SG	MargaryanWillerslevNature2020	953	M	50.67	-2.47
Middle Ages*	VK258	VK258.SG	England_Viking.SG	MargaryanWillerslevNature2020	953	M	50.67	-2.47
Middle Ages*	VK259	VK259.SG	England_Viking.SG	MargaryanWillerslevNature2020	953	M	50.67	-2.47
Middle Ages*	VK260	VK260.SG	England_Viking.SG	MargaryanWillerslevNature2020	953	M	50.67	-2.47
Middle Ages*	VK261	VK261.SG	England_Viking.SG	MargaryanWillerslevNature2020	953	M	50.67	-2.47
Middle Ages*	VK262	VK262.SG	England_Viking.SG	MargaryanWillerslevNature2020	953	M	50.67	-2.47
Middle Ages*	VK263	VK263.SG	England_Viking.SG	MargaryanWillerslevNature2020	953	M	50.67	-2.47
Middle Ages*	VK264	VK264.SG	England_Viking.SG	MargaryanWillerslevNature2020	953	M	50.67	-2.47
Middle Ages*	VK449	VK449.SG	England_Viking.SG	MargaryanWillerslevNature2020	953	M	50.67	-2.47
Middle Ages*	NIEcap6	NIEcap6	Germany_EarlyMiddle Ages*_Alemanic_Langobardian	SullivanScienceAdvances2018	1345	M	48.5411	10.2331
Middle Ages*	NIEcap10	NIEcap10	Germany_EarlyMiddle Ages*_Alemanic_lc	SullivanScienceAdvances2018	1345	M	48.5411	10.2331
Middle Ages*	AED106	AED106.SG	Germany_EarlyMiddle Ages*.SG	VeeramahPNAS2018	1455	M	48.296	11.903
Middle Ages*	AED1119	AED1119.SG	Germany_EarlyMiddle Ages*.SG	VeeramahPNAS2018	1430	F	48.296	11.903
Middle Ages*	AED125b	AED125b.SG	Germany_EarlyMiddle Ages*.SG	VeeramahPNAS2018	1498	F	48.296	11.903
Middle Ages*	AED204	AED204.SG	Germany_EarlyMiddle Ages*.SG	VeeramahPNAS2018	1455	F	48.296	11.903
Middle Ages*	AED432b	AED432b.SG	Germany_EarlyMiddle Ages*.SG	VeeramahPNAS2018	1445	F	48.296	11.903
Middle Ages*	AED92b	AED92b.SG	Germany_EarlyMiddle Ages*.SG	VeeramahPNAS2018	1455	M	48.296	11.903
Middle Ages*	Alh1	Alh1.SG	Germany_EarlyMiddle Ages*.SG	VeeramahPNAS2018	1500	M	48.58	12.2
Middle Ages*	Alh10	Alh10.SG	Germany_EarlyMiddle Ages*.SG	VeeramahPNAS2018	1477	M	48.58	12.2
Middle Ages*	Alh3a	Alh3a.SG	Germany_EarlyMiddle Ages*.SG	VeeramahPNAS2018	1491	F	48.58	12.2
Middle Ages*	BIM33	BIM33.SG	Germany_EarlyMiddle Ages*.SG	VeeramahPNAS2018	1475	F	49.01	12.15
Middle Ages*	BIM37b	BIM37b.SG	Germany_EarlyMiddle Ages*.SG	VeeramahPNAS2018	1350	M	49.01	12.15
Middle Ages*	I0564	NW255a.SG	Germany_EarlyMiddle Ages*.SG	VeeramahPNAS2018	1467	F	48.98	12.14
Middle Ages*	STR220c	STR220c.SG	Germany_EarlyMiddle Ages*.SG	VeeramahPNAS2018	1445	F	48.89	12.57
Middle Ages*	STR241	STR241.SG	Germany_EarlyMiddle Ages*.SG	VeeramahPNAS2018	1455	M	48.89	12.57
Middle Ages*	STR266b	STR266b.SG	Germany_EarlyMiddle Ages*.SG	VeeramahPNAS2018	1430	F	48.89	12.57
Middle Ages*	STR316b	STR316b.SG	Germany_EarlyMiddle Ages*.SG	VeeramahPNAS2018	1455	M	48.89	12.57
Middle Ages*	STR355c	STR355c.SG	Germany_EarlyMiddle Ages*.SG	VeeramahPNAS2018	1430	F	48.89	12.57
Middle Ages*	STR393b	STR393b.SG	Germany_EarlyMiddle Ages*.SG	VeeramahPNAS2018	1455	M	48.89	12.57
Middle Ages*	STR480	STR480.SG	Germany_EarlyMiddle Ages*.SG	VeeramahPNAS2018	1430	F	48.89	12.57
Middle Ages*	STR486	STR486.SG	Germany_EarlyMiddle Ages*.SG	VeeramahPNAS2018	1455	M	48.89	12.57
Middle Ages*	AV1	AV1	Hungary_Avar_5	AmorimNatureCommunications2018	1360	F	46.2833	17.85
Middle Ages*	SZ12	SZ12	Hungary_Langobard	AmorimNatureCommunications2018	1442	M	46.2833	17.85
Middle Ages*	SZ14	SZ14	Hungary_Langobard	AmorimNatureCommunications2018	1442	M	46.2833	17.85
Middle Ages*	SZ16	SZ16	Hungary_Langobard	AmorimNatureCommunications2018	1442	M	46.2833	17.85
Middle Ages*	SZ23	SZ23	Hungary_Langobard	AmorimNatureCommunications2018	1442	M	46.2833	17.85
Middle Ages*	SZ24	SZ24	Hungary_Langobard	AmorimNatureCommunications2018	1442	M	46.2833	17.85
Middle Ages*	SZ25	SZ25	Hungary_Langobard	AmorimNatureCommunications2018	1442	F	46.2833	17.85
Middle Ages*	SZ30	SZ30	Hungary_Langobard	AmorimNatureCommunications2018	1442	F	46.2833	17.85
Middle Ages*	SZ38	SZ38	Hungary_Langobard	AmorimNatureCommunications2018	1442	F	46.2833	17.85
Middle Ages*	SZ41	SZ41	Hungary_Langobard	AmorimNatureCommunications2018	1442	F	46.2833	17.85
Middle Ages*	SZ42	SZ42	Hungary_Langobard	AmorimNatureCommunications2018	1442	M	46.2833	17.85
Middle Ages*	SZ7	SZ7	Hungary_Langobard	AmorimNatureCommunications2018	1442	M	46.2833	17.85
Middle Ages*	SZ9	SZ9	Hungary_Langobard	AmorimNatureCommunications2018	1442	F	46.2833	17.85
Middle Ages*	DA199	DA199.SG	Hungary_Middle Ages*.SG	DamgaardNature2018	703	F	47.5569	21.0153
Middle Ages*	FOV-A1	FOV-A-1_38.SG	Iceland_Early_Christian.SG	EbenesersdottirScience2018	603	M	65.4376	-14.6026
Middle Ages*	TSK-A26	TSK-A-26_38.SG	Iceland_Early_Christian.SG	EbenesersdottirScience2018	825	M	64.1203	-19.8209
Middle Ages*	DAV-A8	DAV-A-8_38.SG	Iceland_Pre_Christian.SG	EbenesersdottirScience2018	1000	F	65.9667	-18.5333
Middle Ages*	DKS-A1	DKS-A-1_38.SG	Iceland_Pre_Christian.SG	EbenesersdottirScience2018	1025	M	64.8851	-24.0445
Middle Ages*	FSS-A1	FSS-A-1_38.SG	Iceland_Pre_Christian.SG	EbenesersdottirScience2018	1015	F	65.317	-19.15
Middle Ages*	GRS-A1	GRS-A-1_38.SG	Iceland_Pre_Christian.SG	EbenesersdottirScience2018	1015	M	65.6422	-16.1203
Middle Ages*	GTE-A1	GTE-A-1_38.SG	Iceland_Pre_Christian.SG	EbenesersdottirScience2018	1015	M	65.367	-14.3
Middle Ages*	HSJ-A1	HSJ-A-1_38.SG	Iceland_Pre_Christian.SG	EbenesersdottirScience2018	1015	M	65.3975	-14.656
Middle Ages*	KNS-A1	KNS-A-1_38.SG	Iceland_Pre_Christian.SG	EbenesersdottirScience2018	950	M	64	-20.15
Middle Ages*	MKR-A1	MKR-A-1_38.SG	Iceland_Pre_Christian.SG	EbenesersdottirScience2018	1015	M	65.64	-17.2361
Middle Ages*	NNM-A1	NNM-A-1_38.SG	Iceland_Pre_Christian.SG	EbenesersdottirScience2018	1015	M	65.5811	-13.8878
Middle Ages*	NTR-A2	NTR-A-2_38.SG	Iceland_Pre_Christian.SG	EbenesersdottirScience2018	1015	F	63.6637	-20.0902
Middle Ages*	ORE-A1	ORE-A-1_38.SG	Iceland_Pre_Christian.SG	EbenesersdottirScience2018	1000	M	65.3665	14.306
Middle Ages*	SBT-A1	SBT-A-1_38.SG	Iceland_Pre_Christian.SG	EbenesersdottirScience2018	1015	M	65.6	-20.1667
Middle Ages*	SSG-A2	SSG-A-2_38.SG	Iceland_Pre_Christian.SG	EbenesersdottirScience2018	1025	M	65.7229	18.1865
[truncated: 447 more rows]
