# Supplementary material for: Ancient implications for today’s precision medicine: How the first Near East farmers shaped the European genetic risk architecture for IBD
Source: Research Square preprint supplement (doi:10.21203/rs.3.rs-2075746/v1), 2022-09-28
Supplement: Supplementary file 3 [file 4872def78b9c461ff9679132.docx]

**Supplementary Figure 1: Frequency trends of the 97 IBD alleles analysed.**

The blue dashed line runs through the mean value of the allele frequency for each of the populations evaluated, thus forming the trend. Populations marked with an asterisk (*) contain samples from published sources. The size of the circles represents the relative sample size. The size of the NFE circles was divided by 100 for visualization.

**Supplementary Figure 2: Frequency trends of the 19 SNVs that grouped into the trajectories 4, 5 and 6**

Each trend is represented as a light grey line and is scaled and centred on the mean of the trend set in its trajectory. The blue line runs through the mean of the trend sets for each of the populations shaping the overall trajectory. On the y-axis, each trend is scaled and centred on its mean, thus the axis denotes the standard deviation. Asterisk (*) in the x-axis labels refers to published data including the modern Non-Finnish European (NFE) population.

**Supplementary Figure 3: Admixture-informed analysis of three missense variant from trajectory 2 (a-d) and 3 (e and f).**

The expected frequency (shaded bar) wascalculated using ancestral admixture components and allele frequencies. Cross above bars mean there was a significant deviation in binomial test betweenobserved and expected frequencies, at +: p ≤ 0.05 ; ++: p ≤ 0.01; +++: p ≤ 0.001. Error bars represent 90%confidence interval. The observed and expectedfrequencies for trajectory 2 and 3 variants do not significantly differentiate in any population and are thereforelikely the result of admixture, except for the observedfrequency of *CD6* rs11230563 in the late farmers (published) which deviates to alow degree from the expected frequency. Populations labels marked with an asterisk (*) contain samples from published sources.

**Supplementary Figure 4: Admixture-informed analysis of four missense variants from trajectory 1**

The expected frequency (shaded bar) was calculated using ancestral admixture components and allele frequencies. Cross above bars mean there was a significant deviation in binomial test between observed and expected frequencies, at +: p ≤ 0.05 ; ++: p ≤ 0.01; +++: p ≤ 0.001. Error bars represent 90% confidence interval. The analyses showed significant deviations between observed and expected allele frequencies of ancient populations for all four variants. The resulting allele frequencies can therefore not be explained by admixture alone. Populations labels marked with an asterisk (*) contain samples from published sources.
