# Supplementary material for: Ancient implications for today’s precision medicine: How the first Near East farmers shaped the European genetic risk architecture for IBD
Source: Research Square preprint supplement (doi:10.21203/rs.3.rs-2075746/v1), 2022-09-28
Supplement: Supplementary file 4 [file 9c711e5173814296f28e13cc.xlsx]

## Sheet: Tabelle1
Supplementary Table 1: Comparison of minor allele frequency between modern non-Finnish Europeans (NFE) and our early or late Neolithic populations.
Gene Name	RS ID	SNP	A1	A2	Pval EF	P.adj EF	MAFp1_EF	MAC_EF	N_EF	OR_EF	Pval_LF	P.adj_LF	MAF_LF	MAC_LF	N_LF	OR_LF	MAF_NFE	MAC_NFE	N_NFE
ADAD1	rs1479918	4:123351431	T	A	0.0603236	0.219528	0.07692	2	26	0.343178	0.00487847	0.0325853	0.06522	3	46	0.290955	0.224149	3451	15396
ATG16L1	rs12994997	2:234173503	A	G	0.00498683	0.0420513	0.7143	30	42	1.43528	0.242153	0.440942	0.4375	42	96	0.879109	0.497663	7667	15406
ATP6V1G3-PTPRC	rs7555082	1:198598663	A	G	0.0757725	0.244142	0.02632	1	38	0.235802	0.00686757	0.0404042	0.02564	2	78	0.229756	0.111601	1720	15412
ATXN2	rs653178	12:112007756	C	T	0.0213003	0.113924	0.3125	15	48	0.652915	1.07113e-12	3.78108e-10	0.1163	10	86	0.242945	0.478622	7366	15390
BSN	rs9858542	3:49701983	A	G	0.229616	0.479612	0.1786	5	28	0.634079	0.00396182	0.0291358	0.1324	9	68	0.469964	0.281623	4337	15400
C17orf67	rs3853824	17:54880993	T	C	4.37014e-05	0.00171407	0	0	22	0	0.135173	0.308813	0.2794	19	68	0.762095	0.366636	5644	15394
CAMK2G-C10orf55	rs2688608	10:75658349	G	T	0.0427447	0.184011	0.3	12	40	0.652462	4.7844e-05	0.00134127	0.1964	11	56	0.427207	0.459797	7068	15372
CAPZB	rs7667	1:19718824	A	G	0.00117335	0.0159305	0.08824	3	34	0.265872	0.0781905	0.21503	0.2241	13	58	0.675376	0.331871	5069	15274
CD28	rs3116494	2:204592021	G	A	0.00290073	0.0301164	0.4737	18	38	1.90786	0.00877594	0.0484048	0.375	33	88	1.51039	0.24828	3825	15406
CD6	rs11230563	11:60776209	T	C	0.00202929	0.023878	0.5385	28	52	1.6388	0.108807	0.268213	0.4038	42	104	1.2291	0.328571	5060	15400
CDH3	rs6499188	16:68674788	G	A	4.17446e-05	0.00171407	0.5938	19	32	2.3938	0.264641	0.474204	0.3148	17	54	1.26923	0.248036	3789	15276
CDKAL1	rs9358372	6:20812588	G	A	0.000923047	0.0143656	0.58	29	50	1.6673	0.616044	0.772603	0.3723	35	94	1.07035	0.347868	5353	15388
CELSR3	rs9868809	3:48681053	T	C	0.19774	0.444599	0.04545	2	44	0.435967	0.00831802	0.0466073	0.01562	1	64	0.149864	0.104261	1605	15394
DNMT3A	rs13428812	2:25492467	G	A	0.0742555	0.244142	0.4524	19	42	1.41558	0.00189509	0.0180802	0.5	35	70	1.56459	0.319573	4908	15358
DUSP22-IRF4	rs7773324	6:382559	G	A	0.366629	0.628252	0.4474	17	38	1.19125	0.00503979	0.032937	0.5222	47	90	1.39057	0.375544	5519	14696
ERAP2	rs2549794	5:96244549	C	T	0.267495	0.509842	0.5833	7	12	1.39395	0.00221348	0.019534	0.7	21	30	1.67274	0.418475	6442	15394
FCGR2A	rs1801274	1:161479745	A	G	0.0893995	0.272052	0.375	18	48	0.752054	6.59299e-06	0.000332475	0.2708	26	96	0.54315	0.498634	7668	15378
FEN1	rs4246215	11:61564299	T	G	0.252456	0.499656	0.4615	12	26	1.31257	0.00799144	0.0454996	0.6667	12	18	1.89593	0.351631	5413	15394
FOSL2	rs925255	2:28614794	T	C	0.000903934	0.0143656	0.2308	12	52	0.506111	0.778085	0.9035	0.47	47	100	1.03078	0.455966	6451	14148
FOXP2-MDFIC	rs1869839	7:114357543	G	A	0.0459802	0.195554	0.1923	5	26	0.506393	0.00128618	0.0147558	0.1786	10	56	0.470222	0.37976	5824	15336
GIPC2-MGC27382	rs17391694	1:78623626	T	C	0.00136301	0.0178201	0	0	48	0	0.929998	0.962049	0.1304	12	92	1.014	0.128634	1982	15408
GPR18	rs3742130	13:99907341	A	G	0.0028133	0.0301164	0.3958	19	48	1.92422	0.00142124	0.0147558	0.3396	36	106	1.65097	0.205711	3170	15410
GPR35-AQP12B	rs4676406	2:241579108	G	T	3.53028e-05	0.00171407	0.7727	34	44	1.66861	0.738779	0.875131	0.4429	31	70	0.956298	0.463096	7115	15364
HLA-DQB1-HLA-DQA2	rs9469220	6:32658310	G	A	0.0679017	0.230474	0.2778	5	18	0.559415	0.00101072	0.0127423	0.2	6	30	0.402779	0.49655	7629	15364
HLA-DRA-HLA-DRB5	rs9268877	6:32431147	A	G	0.138625	0.346132	0.2917	7	24	0.657527	8.15303e-06	0.000349708	0.1974	15	76	0.444943	0.443581	6793	15314
HOXA11-AS	rs4722672	7:27231762	C	T	0.112869	0.308933	0.3	12	40	1.53548	0.000720397	0.0100964	0.34	34	100	1.74021	0.195378	3010	15406
IFNG-AS1-IFNG	rs7134472	12:68499986	A	G	0.0032874	0.0322348	0	0	12	0	0.807397	0.916712	0.4	12	30	1.05488	0.379189	5838	15396
IKZF3	rs12946510	17:37912377	T	C	0.00421537	0.0391586	0.6667	28	42	1.50037	0.361859	0.570251	0.49	49	100	1.10277	0.444336	6833	15378
IL23R	rs11209026	1:67705958	A	G	0.0137894	0.0826278	0.1667	8	48	2.6088	0.00439344	0.0304095	0.1512	13	86	2.36612	0.0638864	985	15418
IL23R	rs10789230	1:67730628	T	G	0.00552102	0.0453238	0.08333	2	24	0.249272	0.925859	0.962049	0.3393	19	56	1.01489	0.334307	5149	15402
IL2RA	rs61839660	10:6094697	T	C	0.00452984	0.0410009	0.225	9	40	2.83552	0.766845	0.896345	0.06667	4	60	0.840153	0.0793506	1222	15400
IMPG2	rs503734	3:101023748	G	A	0.437387	0.696697	0.5588	19	34	1.13778	0.000743642	0.0100964	0.25	12	48	0.509006	0.491153	7495	15260
IRF1-AS1	rs6596075	5:131742228	G	C	0.00499613	0.0420513	0.4091	9	22	2.61039	0.0403375	0.138244	0.2581	16	62	1.6467	0.156716	2415	15410
IRF1-AS1	rs2188962	5:131770805	T	C	1.75464e-08	6.19388e-06	0.04	2	50	0.10429	8.91608e-06	0.000349708	0.1875	21	112	0.48886	0.383546	5902	15388
IRF1-AS1	rs12521868	5:131784393	T	G							0.00654073	0.0404042	0.1562	5	32	0.409272	0.381776	5874	15386
IRF5	rs4728142	7:128573967	A	G	0.00500327	0.0420513	0.2059	7	34	0.467422	0.824357	0.916712	0.4524	38	84	1.02706	0.440464	6762	15352
IRF8-LINC01082	rs2361755	16:86009686	C	G	0.024079	0.123187	0.01786	1	56	0.180556	0.00256767	0.020142	0.02	2	100	0.202222	0.0989011	1512	15288
IRGM	rs11741861	5:150277909	G	A	0.383239	0.647289	0.1154	3	26	1.63812	0.00196515	0.0182552	0.1806	13	72	2.56336	0.0704372	1086	15418
LACC1	rs3764147	13:44457925	G	A	0.0635596	0.224365	0.125	6	48	0.531561	0.00319391	0.0245098	0.1146	11	96	0.487264	0.235157	3620	15394
LINC00598	rs941823	13:41013977	T	C	0.0150687	0.088361	0.4412	15	34	1.77742	3.21126e-05	0.00113357	0.4468	42	94	1.80011	0.248212	3818	15382
LINC00824	rs6651252	8:129567181	C	T	0.000972004	0.0143656	0.3	15	50	2.43667	0.986062	0.988852	0.1224	12	98	0.994559	0.123119	1898	15416
LINC01108-JARID2	rs17119	6:14719496	G	A	3.07611e-05	0.00171407	0.5357	15	28	2.95265	0.0021283	0.0192638	0.325	26	80	1.79128	0.181435	2797	15416
LINC01475	rs11190140	10:101291593	T	C	0.000284782	0.00670187	0.75	33	44	1.57018	0.70599	0.844794	0.5	36	72	1.04679	0.477651	7352	15392
LINC02341	rs9525625	13:43018030	T	C	0.000342415	0.00711015	0.7647	26	34	1.66914	0.00140594	0.0147558	0.6375	51	80	1.39148	0.458144	7060	15410
LINC02341	rs2062305	13:43052880	G	A	0.00312973	0.0315656	0.6818	30	44	1.4891	0.0550866	0.169292	0.5806	36	62	1.26813	0.457874	7054	15406
LINC02571	rs9264942	6:31274380	C	T	4.14366e-06	0.00048757	0.7667	23	30	2.20048	0.0167147	0.0766269	0.4762	40	84	1.36676	0.348408	5362	15390
LOC100287329	rs1799964	6:31542308	C	T	0.298575	0.547698	0.2586	15	58	1.27498	0.000621991	0.00924189	0.3718	29	78	1.83292	0.202843	3097	15268
LOC285626-LINC01845	rs10045431	5:158814533	A	C	0.00282209	0.0301164	0.5833	14	24	2.03862	0.183945	0.370194	0.375	18	48	1.31054	0.286142	4398	15370
LOC400867	rs2836754	21:40291740	T	C	0.616701	0.792606	0.5	3	6	1.26682	0.00682415	0.0404042	0.2083	10	48	0.527842	0.394689	6064	15364
LRRK2	rs4768236	12:40756472	C	A	0.0104214	0.0694108	0.5278	19	36	1.6544	0.000791617	0.0103497	0.5143	36	70	1.61211	0.319015	4909	15388
LTBR	rs7954567	12:6491125	A	G	0.000149163	0.00438788	0.1042	5	48	0.300556	0.219667	0.421426	0.2841	25	88	0.819698	0.34658	5320	15350
MFSD13A	rs3740415	10:104232716	G	A	0.517785	0.737856	0.413	19	46	0.895228	0.00110401	0.0134385	0.3	30	100	0.650218	0.461383	7097	15382
MIR1178	rs11064881	12:120146925	A	G	0.223478	0.475228	0.02381	1	42	0.327891	0.00134129	0.0147558	0	0	88	0	0.0726141	1120	15424
MIR4456-LOC100996325	rs4957048	5:583442	A	G	0.000337739	0.00711015	0	0	36	0	0.000146273	0.0034423	0.04167	3	72	0.209012	0.199351	3072	15410
MIR4456-LOC100996325	rs11739663	5:594083	C	T	0.0483911	0.196346	0.1	5	50	0.478831	4.49379e-05	0.00134127	0.06	6	100	0.287299	0.208842	3217	15404
NCF4-AS1	rs4821544	22:37258503	C	T	0.062959	0.224365	0.4524	19	42	1.43913	0.00551555	0.0347677	0.4722	34	72	1.50225	0.314343	4839	15394
NCOA5-CD40	rs6074022	20:44740196	C	T	0.0940785	0.283844	0.4091	9	22	1.66602	0.000180595	0.00375	0.4559	31	68	1.85658	0.24555	3752	15280
NDFIP1	rs449454	5:141533062	A	G	0.00115354	0.0159305	0.9	9	10	2.36871	0.435963	0.641229	0.4583	11	24	1.20629	0.379953	5849	15394
NFATC1	rs7236492	18:77220616	T	C	0.00167965	0.0211756	0	0	36	0	0.0688113	0.199102	0.09574	9	94	0.588059	0.162815	2508	15404
NFKBIZ	rs616597	3:101569726	A	C	0.000106062	0.00340361	0.5556	20	36	2.23091	0.00133413	0.0147558	0.4022	37	92	1.61498	0.249026	3837	15408
NOD2	rs17221417	16:50739582	G	C	0.617469	0.792606	0.1667	1	6	0.603824	0.00039076	0.00689691	0.5208	25	48	1.88695	0.276019	4254	15412
NOD2	rs2076756	16:50756881	G	A	0.581641	0.778938	0	0	2	0	5.5144e-07	3.89317e-05	0.6471	22	34	2.72596	0.237369	3627	15280
NR5A2	rs2816958	1:200101920	A	G	0.00891944	0.0606837	0.2778	10	36	2.37804	4.02521e-09	7.1045e-07	0.3511	33	94	3.00543	0.11681	1797	15384
NXPE1	rs678170	11:114431956	A	G	0.00581557	0.0466568	0.7222	13	18	1.84034	0.0599685	0.178012	0.5179	29	56	1.31958	0.39244	3561	9074
OLIG3-LOC102723649	rs6933404	6:137959235	C	T	0.252011	0.499656	0.1154	3	26	0.555446	0.00165335	0.0166752	0.0625	4	64	0.300867	0.207733	3202	15414
PHACTR2-AS1-PHACTR2	rs12199775	6:143898894	G	A	0.504295	0.732975	0.03571	1	28	0.489531	0.00237404	0.0196219	0	0	80	0	0.0729561	1078	14776
PLA2G4A	rs10798069	1:186875459	T	G	0.00010319	0.00340361	0.1667	6	36	0.346251	0.0155025	0.0738677	0.3523	31	88	0.731848	0.481347	7406	15386
PLAU	rs2227551	10:75669190	G	T	0.0135605	0.0826278	0.1	3	30	0.339479	1.12689e-07	9.94478e-06	0.06667	6	90	0.22632	0.294569	4534	15392
PLAU	rs2227564	10:75673101	T	C	2.13254e-05	0.00171407	0	0	36	0	4.93954e-05	0.00134127	0.06944	5	72	0.268563	0.258578	3979	15388
PLCL1	rs1440088	2:198871417	G	T	0.000617683	0.0114759	0.425	17	40	2.26158	8.85008e-08	9.94478e-06	0.4271	41	96	2.27267	0.187922	2897	15416
PPBP	rs2457996	4:74856535	C	T	0.179037	0.426592	0	0	16	0	0.00044124	0.00741703	0	0	72	0	0.101989	1569	15384
PRKCB	rs7404095	16:23864590	T	C	0.0731241	0.243517	0.5652	26	46	1.30797	6.76668e-05	0.00170617	0.6383	60	94	1.47708	0.432134	6654	15398
PTPN22	rs2476601	1:114377568	A	G							0.00395157	0.0291358	0.2727	12	44	2.39807	0.113728	1753	15414
RFT1	rs2581828	3:53133149	C	G	0.000976699	0.0143656	0.6304	29	46	1.62938	0.0340758	0.1253	0.5147	35	68	1.33028	0.386916	5950	15378
RORC	rs4845604	1:151801680	A	G	0.234586	0.484262	0.2105	8	38	1.49607	0.00417812	0.0294975	0.2556	23	90	1.81607	0.140719	2144	15236
RPL3-SYNGR1	rs12627970	22:39721745	G	A	2.56415e-05	0.00171407	0	0	44	0	0.682035	0.821701	0.2317	19	82	1.08332	0.213886	3290	15382
RSPO3	rs2503322	6:127457260	A	G	0.000162364	0.00440881	0.8333	20	24	1.84611	0.411135	0.622878	0.5	36	72	1.10767	0.451399	6938	15370
SATB1-AS1-KCNH8	rs4256159	3:18767404	T	C	0.000870649	0.0143656	0	0	44	0	0.000628344	0.00924189	0.04	4	100	0.269917	0.148194	2281	15392
SBNO2	rs2024092	19:1124031	A	G	0.0748397	0.244142	0.12	6	50	0.54134	0.00249288	0.0199997	0.1058	11	104	0.477142	0.221672	3404	15356
SBNO2	rs740495	19:1124835	G	A	0.213846	0.464632	0.1	1	10	0.353444	0.000172789	0.00375	0.0625	3	48	0.220903	0.28293	4326	15290
SH2B3	rs3184504	12:111884608	T	C							0.000211467	0.00414711	0.1842	7	38	0.385838	0.477429	7340	15374
SLC39A11	rs7210086	17:70641698	C	A	0.00263396	0.0299932	0.3913	18	46	1.98039	0.014457	0.0729045	0.09211	7	76	0.466144	0.19759	3033	15350
SLC39A11	rs17780256	17:70642923	C	A	0.00382091	0.0364536	0.3621	21	58	1.82914	0.0104061	0.0548264	0.1038	11	106	0.524254	0.197945	3044	15378
SLC7A10-CEBPA	rs10500264	19:33750314	A	G							0.0023902	0.0196219	0.4286	12	28	2.39581	0.178884	2743	15334
SMAD7	rs12953717	18:46453929	T	C	0.882846	0.977907	0.4	4	10	0.937477	0.00757335	0.0438261	0.6	36	60	1.40622	0.426677	6564	15384
SMAD7	rs3736242	18:46474746	T	C	0.0500319	0.197367	0	0	12	0	0.00918227	0.0498668	0.05556	2	36	0.251412	0.220974	3403	15400
SMURF1-KPNA7	rs9297145	7:98759117	C	A	0.117264	0.308933	0.1429	4	28	0.52304	0.00414721	0.0294975	0.1444	13	90	0.528852	0.273128	4210	15414
SPATA48-IKZF1	rs1456896	7:50304461	C	T	0.00606204	0.0475533	0.1304	6	46	0.423287	0.332824	0.535274	0.3542	34	96	1.14934	0.308147	4743	15392
TAGAP-LOC101929122	rs212388	6:159490436	C	T	0.00174051	0.0211862	0.6087	28	46	1.61083	0.233533	0.431608	0.4375	42	96	1.15778	0.377877	5811	15378
TNFSF15	rs6478109	9:117568766	A	G	0.0111908	0.0731546	0.525	21	40	1.59879	0.00682484	0.0404042	0.4857	34	70	1.47916	0.328373	5053	15388
TNFSF15-TNFSF8	rs13300483	9:117643362	T	C	0.000186626	0.00470565	0.025	1	40	0.101477	0.00232826	0.0196219	0.09375	6	64	0.380539	0.246361	3791	15388
UBE2V2-LOC101929268	rs7011507	8:49129242	A	G	0.0172508	0.0966591	0.3333	6	18	2.82993	0.000326096	0.00605852	0.2794	19	68	2.37215	0.117788	1813	15392
VEGFA-LINC02537	rs943072	6:43795968	G	T	0.255407	0.500882	0.1538	4	26	1.77182	0.000512983	0.00823105	0.25	13	52	2.87921	0.086829	1337	15398
ZFP36L1-ACTN1	rs194749	14:69273905	C	T	2.92933e-06	0.00048757	0	0	46	0	0.00176165	0.0172739	0.1204	13	108	0.496794	0.242294	3726	15378
ZMIZ1	rs1250546	10:81032532	G	A	0.000469734	0.009212	0.1964	11	56	0.46751	0.00513182	0.032937	0.2931	34	116	0.697602	0.420159	6457	15368
ZNF365-ADO	rs10761659	10:64445564	A	G	0.139076	0.346132	0.6071	17	28	1.30543	1.90076e-06	0.000111828	0.7209	62	86	1.55009	0.465089	7154	15382
ZNF365-ADO	rs224090	10:64541319	T	C	0.596173	0.783937	0.3333	4	12	0.805276	0.00489242	0.0325853	0.2	8	40	0.483166	0.413937	6368	15384
ABI1-FAM238C	rs7911117	10:27179596	G	T	0.253367	0.499656	0.3333	2	6	2.30875	0.0296072	0.114005	0.02778	1	36	0.192396	0.144378	2224	15404
ACTR1A	rs2274351	10:104264107	C	T	0.334917	0.5971	0.381	16	42	0.835269	0.629472	0.782406	0.4265	29	68	0.935072	0.456083	7010	15370
ACTR3B-LINC01287	rs4725479	7:152745810	T	C	0.464126	0.712333	0.4524	19	42	1.1404	0.89987	0.959681	0.3889	28	72	0.980344	0.396686	6105	15390
ADAD1	rs17388568	4:123329362	A	G	0.957246	1	0.3	6	20	1.00807	0.0810708	0.216803	0.4167	20	48	1.4001	0.297597	4583	15400
ADAM30	rs2641348	1:120437884	G	A	0.266177	0.509842	0.0625	3	48	0.548307	0.409152	0.622545	0.1413	13	92	1.23965	0.113987	1757	15414
ADCY3	rs6545800	2:25118885	T	C							0.806387	0.916712	0.4583	11	24	1.05665	0.433762	6673	15384
AKAP11-LINC02341	rs61959448	13:42910319	A	G	0.0344805	0.156046	0.04348	2	46	0.298574	0.612554	0.772603	0.1667	11	66	1.14453	0.14562	2244	15410
ANKRD55	rs71624119	5:55440730	A	G	0.766936	0.907132	0.2105	8	38	0.902122	0.534006	0.715424	0.2708	13	48	1.16054	0.233368	3599	15422
ATG16L1	rs6752107	2:234161448	A	G							0.170845	0.354754	0.3333	6	18	0.668494	0.498633	7661	15364
ATP6V1G3-PTPRC	rs76181804	1:198601705	G	A	0.114929	0.308933	0.02941	1	34	0.265153	0.0791895	0.21503	0.03846	2	52	0.346739	0.110924	1710	15416
B3GNT2-TMEM17	rs11679753	2:62552321	A	G	0.52051	0.737912	0.4348	20	46	1.11933	0.61639	0.772603	0.4194	26	62	1.07961	0.388432	5957	15336
BACH2	rs1847472	6:90973159	A	C	0.52945	0.743203	0.3636	16	44	1.1379	0.884224	0.954529	0.3261	30	92	1.0204	0.319569	4922	15402
BANK1	rs13126505	4:102865304	A	G	0.512551	0.73549	0.02778	1	36	0.491689	0.311303	0.523286	0.03191	3	94	0.564919	0.0564946	869	15382
BOK-AS1	rs76527535	2:242484701	T	C	0.117051	0.308933	0.4167	5	12	1.958	0.793483	0.916712	0.2273	10	44	1.068	0.212802	3278	15404
BPIFB4-BPIFA2	rs6059101	20:31718653	T	C	0.852164	0.952725	0.2273	5	22	0.914316	0.819284	0.916712	0.2353	16	68	0.946586	0.248571	3828	15400
BTBD8	rs34856868	1:92554283	A	G	0.574894	0.777538	0	0	22	0	0.0150586	0.073829	0.07895	6	76	3.1748	0.0248669	383	15402
C5orf66	rs254562	5:134441457	G	A	0.48148	0.719465	0.3571	10	28	0.840934	0.530617	0.715424	0.38	19	50	0.894754	0.424698	6531	15378
C5orf66	rs254560	5:134443606	A	G	0.95565	1	0.4167	20	48	0.989182	0.319727	0.532376	0.3696	34	92	0.877361	0.421224	6486	15398
CACNA2D1	rs929351	7:81857893	G	T	0.0253697	0.126134	0.25	9	36	0.57705	0.327446	0.532695	0.5	27	54	1.1541	0.433238	6658	15368
CAMK2A	rs17656349	5:149605994	C	T							0.156756	0.341573	0.625	10	16	1.40993	0.443286	6800	15340
CARD9	rs10781499	9:139266405	A	G	0.80646	0.923034	0.4524	19	42	1.04273	0.0353339	0.127274	0.5417	52	96	1.24853	0.433845	6676	15388
CAVIN1	rs11871801	17:40570772	C	A	0.301266	0.54818	0.1562	5	32	0.664429	0.367492	0.574002	0.18	9	50	0.765422	0.235164	3622	15402
CCDC26	rs13277237	8:130604563	G	A	0.105785	0.308614	0.5714	16	28	1.37035	0.137147	0.310338	0.5	40	80	1.19905	0.416996	6340	15204
CCDC85B	rs568617	11:65653242	T	C	0.0821127	0.259869	0.08333	3	36	0.429848	0.819424	0.916712	0.1837	18	98	0.94742	0.193867	2984	15392
CCL7	rs3091315	17:32593665	G	A	0.476589	0.719465	0.2321	13	56	0.841525	0.0122462	0.0626509	0.163	15	92	0.591037	0.27586	4251	15410
CCL7	rs3091316	17:32593974	A	G	0.383102	0.647289	0.125	1	8	0.453843	0.219435	0.421426	0.1905	8	42	0.691571	0.275425	4241	15398
CCND3	rs67289879	6:42007403	T	C	0.114687	0.308933	0.1296	7	54	0.599027	0.0210457	0.0895075	0.3382	23	68	1.56301	0.2164	3333	15402
CCNY	rs12261843	10:35554054	G	T	0.972847	1	0.2778	5	18	0.999169	0.730464	0.871128	0.25	9	36	0.899252	0.278009	4278	15388
CD226	rs17207042	18:67537351	T	C	0.29945	0.547698	0.5588	19	34	1.19252	0.42569	0.637414	0.4167	25	60	0.889163	0.468606	7105	15162
CDKAL1	rs2328546	6:20657345	T	C							0.0191094	0.0843109	0	0	18	0	0.197495	3043	15408
CHP1	rs28374715	15:41563950	G	A	0.692215	0.8514	0.2963	16	54	1.08487	0.388686	0.601635	0.3125	30	96	1.1442	0.273117	4206	15400
CHSY3-HINT1	rs10051722	5:130104076	C	A	0.449727	0.698999	0.25	8	32	0.796051	0.536272	0.715424	0.3452	29	84	1.09931	0.31405	4837	15402
CIITA	rs4781011	16:10975311	T	G	0.319039	0.577542	0.1429	2	14	0.537778	0.242998	0.440942	0.1765	6	34	0.664314	0.265643	4084	15374
CLCA2	rs2249296	1:86910264	T	C	0.34111	0.60206	0.1842	7	38	1.40532	0.177167	0.361503	0.07576	5	66	0.577947	0.131081	2021	15418
CNTNAP2-C7orf33	rs7807268	7:148258048	G	C	0.727247	0.879172	0.5	10	20	1.08567	0.314689	0.526471	0.3929	22	56	0.853023	0.460547	7004	15208
COG6-LINC00332	rs9548988	13:40505510	T	C	0.325475	0.586187	0.6667	4	6	1.48022	0.4702	0.674718	0.375	9	24	0.832623	0.450384	6926	15378
COG6-LINC00332	rs915286	13:40695992	G	A	0.0503201	0.197367	0.7143	10	14	1.60263	0.328973	0.532695	0.5278	19	36	1.18417	0.445695	6853	15376
CPXM2	rs4246949	10:125517080	T	C	0.00834105	0.060369	0.3958	19	48	1.75837	0.352795	0.55846	0.2683	22	82	1.19181	0.225114	3469	15410
CRTC3	rs7165170	15:91181489	C	A	0.0990048	0.293687	0.09091	4	44	0.492438	0.819966	0.916712	0.1719	11	64	0.931015	0.18461	2843	15400
CTH-LINC01788	rs2651244	1:70995562	A	G	0.138675	0.346132	0.2885	15	52	0.742171	0.07834	0.21503	0.3039	31	102	0.781948	0.388672	5984	15396
CTIF-SMAD7	rs7240004	18:46395022	G	A	0.422839	0.684689	0.4259	23	54	1.14244	0.0937013	0.237717	0.4528	48	106	1.2146	0.372822	5734	15380
CUL1	rs243505	7:148435339	G	A	0.241064	0.489055	0.5	12	24	1.3132	0.633478	0.784623	0.35	21	60	0.919243	0.380748	5862	15396
CXCR5	rs630923	11:118754353	A	C	0.249171	0.499656	0.2368	9	38	1.43471	0.85774	0.933361	0.1719	11	64	1.04116	0.16508	2531	15332
CYTH1	rs17736589	17:76737118	G	A	0.487924	0.719465	0.2667	8	30	1.24053	0.324327	0.532695	0.1667	12	72	0.775332	0.214962	3316	15426
DAP	rs267939	5:10752315	C	T							0.925383	0.962049	0.35	7	20	0.965275	0.362591	5581	15392
DENND1B	rs1998598	1:197727642	G	A							0.307889	0.522523	0.1667	2	12	0.539599	0.308871	4756	15398
DNMT3B	rs6087990	20:31349908	C	T	0.712925	0.86482	0.375	12	32	0.918216	0.240047	0.440942	0.3478	32	92	0.851679	0.4084	6184	15142
DNMT3B	rs4911259	20:31376282	G	T	0.995059	1	0.375	6	16	0.991453	0.775053	0.902949	0.3529	12	34	0.933133	0.378233	5821	15390
DOCK7	rs1748195	1:63049593	G	C	0.0839238	0.259869	0.1875	6	32	0.569233	0.0105955	0.0550032	0.2045	18	88	0.620982	0.32939	5068	15386
DPH5	rs11583043	1:101466054	T	C	0.518381	0.737856	0.2188	7	32	0.80426	0.105618	0.262557	0.3537	29	82	1.30027	0.271989	4187	15394
DSE	rs2858829	6:116768917	G	A	0.0239477	0.123187	0.08333	1	12	0.211307	0.0600098	0.178012	0.25	10	40	0.633921	0.394371	6067	15384
DUSP16	rs11612508	12:12657513	G	A	0.555599	0.768916	0.5	1	2	1.80005	0.173936	0.356974	0.1667	5	30	0.600016	0.277771	4241	15268
EMSY-LRRC32	rs2155219	11:76299194	T	G	0.44833	0.698999	0.4231	11	26	0.847808	0.986161	0.988852	0.5	40	80	1.00195	0.499025	7675	15380
EPO	rs1734907	7:100315517	A	G	0.594788	0.783937	0.2143	3	14	1.30763	0.0353154	0.127274	0.2647	18	68	1.6153	0.163874	2523	15396
ERAP2	rs1363907	5:96252803	A	G	0.0283152	0.135071	0.2353	8	34	0.56151	0.0327813	0.121809	0.5357	45	84	1.27844	0.419038	6449	15390
ERGIC1	rs564349	5:172324978	G	A	0.850956	0.952725	0.3125	10	32	1.04534	0.0484091	0.155349	0.21	21	100	0.702466	0.298947	4599	15384
ERRFI1-LINC01714	rs72634258	1:8150638	C	T	0.679178	0.838286	0	0	2	0	0.512125	0.708942	0.1111	2	18	0.631691	0.175895	2713	15424
ETS1	rs11221332	11:128380974	T	C	0.211632	0.464012	0	0	6	0	0.748093	0.883201	0.25	8	32	1.09607	0.228088	3508	15380
F5	rs6025	1:169519049	T	C	0.707243	0.863864	0.03333	1	30	1.32851	0.942863	0.962049	0.02222	2	90	0.885673	0.025091	387	15424
FAM241B-COL13A1	rs2642575	10:71543168	T	C	0.557521	0.768916	0.3077	8	26	1.19251	0.0706825	0.201426	0.1667	12	72	0.645943	0.258021	3973	15398
FAM53B-EEF1AKMT2	rs111456533	10:126439381	A	G	0.350355	0.609237	0	0	6	0	0.0551518	0.169292	0.05263	2	38	0.3281	0.160413	2454	15298
FASLG-TNFSF18	rs12035082	1:172898377	C	T	0.810596	0.923034	0.5	1	2	1.2337	0.0727167	0.205352	0.5556	20	36	1.37077	0.405286	6226	15362
FBXL17-LINC01023	rs4571457	5:107834247	C	T	0.74341	0.895644	0.5	1	2	1.34521	0.823289	0.916712	0.3889	14	36	1.04628	0.371688	5724	15400
FCAR	rs11672983	19:55383051	A	G	0.0373058	0.166696	0.6	18	30	1.47	0.328811	0.532695	0.4688	30	64	1.14844	0.408163	6280	15386
FOS	rs1569328	14:75741751	T	C	0.0524455	0.199067	0.07692	4	52	0.441706	0.60045	0.77076	0.1531	15	98	0.878904	0.17415	2684	15412
FUT2	rs632111	19:49208978	G	A	0.229427	0.479612	0.25	2	8	0.527344	0.524181	0.715424	0.5294	18	34	1.11673	0.474074	7296	15390
FUT2	rs503279	19:49209010	C	T	0.155068	0.377511	0.1667	1	6	0.350558	0.535059	0.715424	0.5278	19	36	1.1101	0.475432	7315	15386
GAL3ST2	rs35320439	2:242737341	C	T	0.0601578	0.219528	0.4318	19	44	1.45261	0.802578	0.916712	0.3085	29	94	1.03781	0.297271	4575	15390
GCKR	rs780093	2:27742603	T	C	0.0185301	0.102205	0.7143	10	14	1.81876	0.244468	0.440942	0.2941	10	34	0.748902	0.392732	6041	15382
GNA12	rs1182188	7:2869985	C	T	0.845658	0.952725	0.2857	12	42	0.94852	0.0593854	0.178012	0.39	39	100	1.29473	0.301221	4637	15394
GPD2-GALNT5	rs8179646	2:157598678	T	C	0.0298599	0.138392	0.08333	1	12	0.218842	0.0789638	0.21503	0.2353	8	34	0.617908	0.380792	5868	15410
GPR12-USP12	rs12585310	13:27528347	A	G	0.298588	0.547698	0.125	1	8	0.409038	0.0147436	0.0733026	0.1607	9	56	0.525906	0.305595	4708	15406
GPR65	rs8005161	14:88472595	T	C	0.133988	0.342737	0.02381	1	42	0.275156	0.675355	0.81644	0.09783	9	92	1.13053	0.086531	1335	15428
GRID2IP	rs11768365	7:6545188	G	A							0.188313	0.375562	0.1389	5	36	0.601053	0.231076	3535	15298
HDAC7	rs11168249	12:48208368	C	T	0.409791	0.669786	0.5263	20	38	1.14719	0.566435	0.737828	0.4268	35	82	0.93034	0.458788	7058	15384
HDAC9	rs11764116	7:18800413	T	G	0.852864	0.952725	0.1667	1	6	0.775461	0.617207	0.772603	0.1818	8	44	0.845957	0.214926	3309	15396
HGFAC	rs2073505	4:3444503	A	G	0.567304	0.776195	0.08696	4	46	1.29609	0.36395	0.570998	0.09	9	100	1.34145	0.0670914	1032	15382
HHEX-EXOC6	rs11187157	10:94502244	C	T	0.706669	0.863864	0.5	7	14	1.1138	0.138483	0.311366	0.3462	18	52	0.771093	0.448913	6898	15366
HLA-DRA-HLA-DRB5	rs9268853	6:32429643	C	T	0.147371	0.363791	0.125	2	16	0.431604	0.02991	0.114005	0.1429	6	42	0.493262	0.289617	4463	15410
HNF4A	rs6017342	20:43065028	A	C	0.450521	0.698999	0.3571	5	14	0.773096	0.825819	0.916712	0.4744	37	78	1.02683	0.461964	7093	15354
HNF4A-LINC01430	rs4812833	20:43068996	G	A	0.758454	0.907132	0.5	17	34	1.05614	0.499049	0.699065	0.5147	35	68	1.0872	0.473424	7286	15390
HORMAD2	rs2412970	22:30486826	G	A	0.574329	0.777538	0.375	3	8	0.778644	0.564146	0.737568	0.5417	13	24	1.12471	0.481607	7410	15386
HORMAD2	rs5763767	22:30493882	A	G	0.0834979	0.259869	0.6136	27	44	1.2736	0.165049	0.348876	0.5556	50	90	1.15306	0.481811	7417	15394
IFIH1	rs1990760	2:163124051	C	T	0.243713	0.491603	0.5	12	24	1.31097	0.200082	0.392383	0.2963	16	54	0.77687	0.381398	5872	15396
IFNG-AS1-IFNG	rs1558744	12:68504592	A	G	0.0159375	0.0907407	0	0	8	0	0.348024	0.55339	0.5	12	24	1.2375	0.404041	6219	15392
IFNGR2	rs2834215	21:34796886	A	G	0.593852	0.783937	0.42	21	50	0.916516	0.671883	0.81644	0.4362	41	94	0.951802	0.458257	7037	15356
IL17REL	rs5771069	22:50435480	A	G	0.169167	0.40623	0.3333	6	18	0.667624	0.124552	0.291077	0.619	26	42	1.23987	0.499283	7664	15350
IL18R1	rs1420098	2:102984279	C	T							0.429703	0.640022	0.5	7	14	1.26983	0.393752	6063	15398
IL18RAP	rs6708413	2:103063369	G	A	0.0723157	0.243119	0.119	5	42	0.511306	0.46593	0.671319	0.2019	21	104	0.867254	0.23283	3580	15376
IL19	rs3024505	1:206939904	A	G	0.0276916	0.134882	0	0	22	0	0.449056	0.657191	0.1184	9	76	0.786614	0.150545	2319	15404
IL19	rs3024493	1:206943968	A	C	0.0240055	0.123187	0.02778	1	36	0.184961	0.572797	0.740649	0.125	9	72	0.832325	0.150182	2314	15408
IL1R2-IL1R1	rs10185424	2:102662888	T	G	0.769845	0.907132	0.4643	13	28	1.06259	0.542114	0.716727	0.3966	23	58	0.907568	0.436939	6714	15366
IL23R	rs11209002	1:67590461	T	C	0.432696	0.694281	0	0	4	0	0.0391754	0.138065	0.3438	11	32	1.81894	0.188984	2913	15414
IL23R	rs6669582	1:67730055	G	A	0.0479393	0.196346	0.5	15	30	1.54494	0.224723	0.42649	0.4038	21	52	1.24784	0.323636	4984	15400
IL26	rs2870946	12:68596661	C	T	0.440123	0.696697	0.025	1	40	0.44843	0.733053	0.871271	0.04412	3	68	0.791347	0.05575	860	15426
IL27	rs26528	16:28517709	C	T	0.0200565	0.108922	0.2895	11	38	0.605703	0.148383	0.329428	0.4022	37	92	0.84152	0.477913	7357	15394
IL2RA	rs12722515	10:6081230	A	C	0.110814	0.308933	0.04167	1	24	0.267584	0.00971691	0.0519707	0.2794	19	68	1.79439	0.155714	2398	15400
IL7R	rs3194051	5:35876274	G	A	0.00831373	0.060369	0.5	16	32	1.80436	0.0208307	0.0895075	0.4167	25	60	1.50364	0.277106	4263	15384
INAVA	rs7554511	1:200877562	A	C	0.278563	0.517541	0.1765	6	34	0.681444	0.662377	0.811872	0.2791	24	86	1.07763	0.258966	3986	15392
INTS11	rs12103	1:1247494	T	C	0.978453	1	0.1842	7	38	0.976581	0.390296	0.601635	0.2234	21	94	1.18436	0.188628	2843	15072
IPMK	rs2790216	10:59997926	A	G	0.0670772	0.229886	0.1346	7	52	0.560533	0.244829	0.440942	0.2917	28	96	1.21449	0.240156	3696	15390
IRF6	rs59043219	1:209970610	A	G	0.397643	0.659004	0	0	2	0	0.135598	0.308813	0.5714	8	14	1.54671	0.369447	5589	15128
IRF8-LINC01082	rs16940202	16:86014241	C	T	0.0115666	0.0742367	0.32	16	50	1.85199	0.119551	0.287084	0.1029	7	68	0.595768	0.172787	2663	15412
IRF8-LINC01082	rs11641016	16:86014881	G	C	0.0468399	0.195609	0.09091	4	44	0.439365	0.0264621	0.106149	0.1029	7	68	0.497517	0.20691	3186	15398
ITGAL	rs11150589	16:30482494	T	C	0.061676	0.222159	0.25	4	16	0.51311	0.93444	0.962049	0.4815	26	54	0.988213	0.487225	7475	15342
ITLN1	rs2274910	1:160852046	T	C							0.325577	0.532695	0.25	10	40	0.771888	0.323881	4980	15376
JAK2	rs10758669	9:4981602	C	A	0.112229	0.308933	0.2391	11	46	0.682571	0.58489	0.753527	0.3222	29	90	0.919747	0.350338	5391	15388
JAZF1	rs864745	7:28180556	T	C	0.397606	0.659004	0.3889	7	18	0.791122	0.109413	0.268213	0.5909	39	66	1.20209	0.491566	7577	15414
JAZF1	rs10276381	7:28190121	T	C	0.26013	0.504538	0.03846	1	26	0.353984	0.267475	0.476862	0.06452	4	62	0.593779	0.108653	1675	15416
KCCAT333	rs1077773	7:17442679	G	A	0.111268	0.308933	0.6	30	50	1.23388	0.674166	0.81644	0.4625	37	80	0.951117	0.48627	7473	15368
KCNJ3-LINC01876	rs1520339	2:156751921	T	C							0.539102	0.715424	0.2222	4	18	0.759087	0.292749	4506	15392
KHDC4	rs670523	1:155878732	A	G	0.02496	0.12587	0.4808	25	52	1.45923	0.894568	0.956917	0.3222	29	90	0.978011	0.329467	5056	15346
KIAA1109	rs7657746	4:123161619	G	A	0.11268	0.308933	0.1346	7	52	0.598852	0.0383094	0.136598	0.1383	13	94	0.615234	0.224789	3464	15410
KIF11-HHEX	rs7911264	10:94436851	T	C	0.557627	0.768916	0.5333	16	30	1.11352	0.0156943	0.0738677	0.6667	28	42	1.3919	0.47896	7353	15352
KSR1	rs2945412	17:25843643	G	A	0.0405719	0.179023	0.2143	6	28	0.532858	0.0456302	0.149143	0.2857	20	70	0.710477	0.402144	6189	15390
LDHD-ZFP1	rs7195303	16:75167579	G	A	0.451478	0.698999	0.03846	1	26	0.459751	0.0883919	0.22953	0.02941	2	68	0.351574	0.083657	1291	15432
LINC00331-RBM26	rs7319358	13:79550934	T	C	0.00868315	0.0606837	0.2	6	30	0.461608	0.891977	0.956917	0.4423	23	52	1.02086	0.433268	6668	15390
LINC00484	rs4743820	9:93928416	C	T	0.029608	0.138392	0.4375	21	48	1.51462	0.290196	0.499704	0.2396	23	96	0.829435	0.288851	4446	15392
LINC00548-LINC00598	rs17061048	13:40833012	A	T	0.214547	0.464632	0	0	28	0	0.226597	0.427747	0.1	4	40	1.8678	0.053539	826	15428
LINC00603-PTGER4	rs1842076	5:40237018	C	T	0.78921	0.919443	0.3	6	20	1.08799	0.616743	0.772603	0.3095	13	42	1.12253	0.275737	4248	15406
LINC00603-PTGER4	rs9292777	5:40437948	C	T	0.672071	0.834291	0.5	2	4	1.28588	0.193025	0.380658	0.5	17	34	1.28588	0.388838	5985	15392
LINC01098-LINC00290	rs6811556	4:180284814	T	C	0.407957	0.669786	0.3095	13	42	0.831018	0.0398942	0.138065	0.2625	21	80	0.704767	0.372464	5727	15376
LINC01271-PTPN1	rs913678	20:48955424	C	T	0.104699	0.307988	0.4231	22	52	1.3406	0.222105	0.423801	0.3725	38	102	1.18049	0.315588	4855	15384
LINC01485-CPEB4	rs359457	5:173279842	C	T	0.527984	0.743203	0.3958	19	48	0.895744	0.0535816	0.168829	0.5465	47	86	1.23672	0.441904	6785	15354
LINC01678-ICOSLG	rs762421	21:45615561	G	A	0.759244	0.907132	0.4062	13	32	1.06758	0.941332	0.962049	0.375	21	56	0.985458	0.380534	5845	15360
LINC01700-PSMG1	rs2836878	21:40465534	A	G	0.488846	0.719465	0.3148	17	54	1.15317	0.0292018	0.114005	0.3725	38	102	1.36466	0.272999	4208	15414
LINC01700-PSMG1	rs2836883	21:40466744	A	G	0.958691	1	0.275	11	40	1.00683	0.0627736	0.183133	0.3788	25	66	1.38681	0.273135	4197	15366
LINC01882-PTPN2	rs2847278	18:12778715	C	T	0.180063	0.426592	0.2778	5	18	1.79936	0.274873	0.481157	0.2222	8	36	1.43949	0.154375	2378	15404
LINC01923-SATB2	rs17229285	2:199523122	T	C	0.563472	0.773951	0.4333	13	30	0.889483	0.653092	0.80328	0.5132	39	76	1.05333	0.487174	7483	15360
LINC01923-SATB2	rs1405108	2:199745018	C	A	0.183414	0.431437	0.1667	2	12	0.469927	0.0735868	0.20616	0.2	6	30	0.563913	0.354665	5459	15392
LINC02278-KLF3-AS1	rs11734570	4:38588453	A	G	0.258353	0.503859	0.75	3	4	1.7226	0.932617	0.962049	0.4444	8	18	1.0208	0.43539	6705	15400
LINC02380-LINC02494	rs11133504	4:58380322	A	G	0.42503	0.685093	0.1346	7	52	0.754531	0.668299	0.816296	0.1562	10	64	0.875795	0.178409	2750	15414
LITAF-SNN	rs11641184	16:11704651	A	C	0.959813	1	0.4688	15	32	1.00897	0.0193461	0.0843109	0.6167	37	60	1.32735	0.464583	7136	15360
LOC101928446	rs10492862	16:82867456	A	C	0.120893	0.316112	0.1364	3	22	0.479893	0.018649	0.0833304	0.14	7	50	0.49269	0.284154	4372	15386
LOC102723649-LINC02539	rs6920220	6:138006504	A	G	0.0760783	0.244142	0.08824	3	34	0.425866	0.0163633	0.0760034	0.1026	8	78	0.495024	0.20719	3187	15382
LOC285626-LINC01845	rs9313808	5:158820844	A	G	0.394102	0.659004	0.25	4	16	1.48611	0.887115	0.95473	0.1739	8	46	1.03382	0.168224	2592	15408
LOC285626-LINC01845	rs6871626	5:158826792	A	C	0.597502	0.783937	0.3889	14	36	1.11991	0.298754	0.511943	0.4024	33	82	1.15893	0.347249	5340	15378
LOC340090-LINC02230	rs10061469	5:72518148	C	T	0.484198	0.719465	0.25	4	16	0.740858	0.0610187	0.179497	0.4444	32	72	1.31708	0.337446	5196	15398
LOC340090-LINC02230	rs7702331	5:72551134	G	A	0.232512	0.482803	0.2857	8	28	0.71856	0.759706	0.890951	0.4167	25	60	1.0479	0.397621	6117	15384
LOC728755-FOXG1-AS1	rs1956388	14:29132877	A	G	0.207212	0.460037	0.3529	12	34	0.763737	0.0440589	0.146724	0.32	16	50	0.692455	0.462124	7101	15366
LPP	rs56116661	3:188401160	T	C							0.172749	0.35661	0.3333	8	24	1.56315	0.213245	3278	15372
LPXN	rs10896794	11:58339124	C	T	0.350348	0.609237	0.375	3	8	1.65099	0.0872555	0.22953	0.1	3	30	0.440265	0.227136	3318	14608
LSP1	rs907611	11:1874072	A	G	0.48597	0.719465	0.3696	17	46	1.14935	0.0300354	0.114005	0.2281	26	114	0.709302	0.321542	4872	15152
MAGI1	rs11924265	3:65760342	C	T	0.422815	0.684689	0	0	12	0	0.0169961	0.0769182	0.1739	8	46	2.51132	0.0692517	1068	15422
MAML2	rs483905	11:96023427	A	G	0.581387	0.778938	0.2273	5	22	0.8	0.23166	0.4304	0.3462	27	78	1.21846	0.284091	4375	15400
MAP3K8	rs1042058	10:30728101	T	C	0.139237	0.346132	0.5	19	38	1.31281	0.759116	0.890951	0.3958	38	96	1.03931	0.380863	5863	15394
MIR1181	rs11879191	19:10512911	A	G	0.0851881	0.26149	0.1	5	50	0.517623	0.0226012	0.0927699	0.1078	11	102	0.558221	0.193191	2945	15244
MIR3909	rs138788	22:35729721	G	A	0.710793	0.86482	0.3333	2	6	0.796014	0.0214609	0.0901868	0.2368	9	38	0.565589	0.418753	6422	15336
MIR3924-IPMK	rs1819658	10:59913151	T	C	0.191152	0.435333	0.1	2	20	0.4506	0.972481	0.980816	0.2222	12	54	1.00133	0.221927	3419	15406
MIR4418-ZBTB40	rs7524102	1:22698447	G	A	0.887125	0.97861	0.125	1	8	0.793487	0.94213	0.962049	0.1591	7	44	1.00989	0.157532	2426	15400
MMP24-AS1-EDEM2	rs6088765	20:33799280	G	T	0.049935	0.197367	0.2667	8	30	0.599883	0.903457	0.960205	0.4375	35	80	0.984183	0.444531	6828	15360
MUC19	rs11564258	12:40792300	A	G	0.883717	0.977907	0.02273	1	44	1.02379	0.127575	0.294339	0	0	92	0	0.0221991	342	15406
MYT1L-LINC01250	rs11679592	2:2406488	T	C	0.275298	0.516916	0	0	2	0	0.507371	0.705126	0.5556	10	18	1.16871	0.475358	7311	15380
NELL1	rs1793004	11:20698929	C	G	0.395377	0.659004	0.125	1	8	0.460448	0.81956	0.916712	0.2857	12	42	1.05245	0.271475	4178	15390
NFKB1	rs3774959	4:103511114	A	G	0.673577	0.834291	0.3929	22	56	1.07324	0.125336	0.291077	0.45	36	80	1.22935	0.366047	5632	15386
NOD2	rs2066844	16:50745926	T	C	0.925206	1	0	0	2	0	0.0397081	0.138065	0.125	4	32	3.27849	0.0381274	588	15422
NOTCH1	rs13300218	9:139399641	A	G	0.800328	0.923034	0	0	2	0	0.572471	0.740649	0.075	3	40	0.711576	0.1054	1624	15408
NRIP1-USP25	rs1297265	21:16817051	G	A	0.650475	0.825552	0.4	12	30	0.904139	0.167028	0.348882	0.537	29	54	1.21389	0.44241	6814	15402
OSMR	rs395157	5:38867732	T	C	0.409841	0.669786	0.3889	7	18	0.795344	0.271096	0.479468	0.5526	42	76	1.13023	0.488957	7527	15394
OTUD3	rs4654925	1:20227723	C	G	0.274029	0.516916	0	0	2	0	0.166902	0.348882	0.3333	8	24	0.699445	0.476569	7322	15364
PDGFB-RPL3	rs2413583	22:39659773	T	C	0.338657	0.600733	0.1	3	30	0.597827	0.465308	0.671319	0.1383	13	94	0.826782	0.167272	2577	15406
PER3	rs2797685	1:7879063	T	C	0.33265	0.596067	0	0	6	0	0.965188	0.97625	0.1667	4	24	0.994195	0.16764	2584	15414
PHF5A	rs727563	22:41867377	C	T	0.262964	0.507247	0.3571	5	14	1.58604	0.551779	0.726784	0.1875	9	48	0.832673	0.225178	3470	15410
PLA2R1	rs4664304	2:160794008	A	G	0.184552	0.431437	0.3235	11	34	0.739413	0.607417	0.772603	0.4651	40	86	1.063	0.437549	6733	15388
PLCG2	rs11548656	16:81916912	G	A	0.106799	0.308933	0.1071	3	28	2.85381	0.943445	0.962049	0.03333	2	60	0.887853	0.0375438	579	15422
PLCXD2	rs9868898	3:111480946	G	A	0.35709	0.614892	0.1538	4	26	0.661268	0.955865	0.969599	0.2286	16	70	0.982455	0.232653	3581	15392
PPBP	rs2472649	4:74857708	A	G							0.535573	0.715424	0.1176	4	34	0.737159	0.159595	2460	15414
PPP5C	rs4802307	19:46849806	T	G	0.611335	0.792606	0.325	13	40	1.12372	0.559599	0.734344	0.2609	24	92	0.901986	0.289217	4447	15376
PRDX5-CCDC88B	rs694739	11:64097233	G	A	0.493423	0.722732	0.25	2	8	0.660858	0.848648	0.930499	0.3913	18	46	1.03439	0.378296	5825	15398
PREP-PRDM1	rs6568421	6:106435025	G	A	0.189112	0.435333	0.1957	9	46	0.691804	0.203444	0.396771	0.2162	16	74	0.764516	0.282815	4361	15420
PREP-PRDM1	rs4946717	6:106474749	C	T	0.0520086	0.199067	0.6818	15	22	1.44708	0.333599	0.535274	0.5417	26	48	1.14962	0.471169	7256	15400
PREP-PRDM1	rs6911490	6:106522027	T	C	0.76744	0.907132	0.1786	5	28	0.871546	0.945697	0.962049	0.2069	12	58	1.00979	0.20489	3159	15418
PRM2	rs423674	16:11373405	T	G	0.0138103	0.0826278	0	0	20	0	0.0453196	0.149143	0.09677	6	62	0.501739	0.192878	2968	15388
PTCD2-ZNF366	rs4703855	5:71693899	T	C	0.616338	0.792606	0.2632	10	38	0.870132	0.275336	0.481157	0.3542	34	96	1.17105	0.302435	4646	15362
PTGIR	rs11083840	19:47119910	G	T	0.770108	0.907132	0.3611	13	36	0.935049	0.435759	0.641229	0.4255	40	94	1.10186	0.386195	5925	15342
PTGIR	rs1126510	19:47123783	G	A	0.80453	0.923034	0.3261	15	46	0.945917	0.229662	0.428945	0.4103	32	78	1.19008	0.344731	5293	15354
PTK2B	rs17057051	8:27227554	G	A	0.0576789	0.214323	0.1731	9	52	0.596916	0.154266	0.338235	0.3587	33	92	1.23709	0.289952	4467	15406
PTPN2	rs80262450	18:12818922	A	G							0.16467	0.348876	0	0	16	0	0.106675	1614	15130
PUS10	rs13003464	2:61186829	G	A	0.0126048	0.079455	0.5789	22	38	1.53724	0.488756	0.688955	0.4194	26	62	1.11348	0.376615	5772	15326
PUS10	rs10181042	2:61224259	T	C	0.23841	0.486504	0.5	19	38	1.23608	0.475212	0.679149	0.45	27	60	1.11247	0.404505	6214	15362
RAD51B-ZFP36L1	rs4902642	14:69210199	A	G	0.161506	0.39049	0.3125	10	32	0.716134	0.413525	0.623822	0.3833	23	60	0.878458	0.436371	6714	15386
RASGRP1-LINC02694	rs16967103	15:38899190	C	T	0.805505	0.923034	0.18	9	50	0.918674	0.433965	0.641229	0.2283	21	92	1.16499	0.195935	3017	15398
RELA	rs732072	11:65427568	A	G	0.11429	0.308933	0.1667	5	30	2.09804	0.806019	0.916712	0.08621	5	58	1.08519	0.0794393	1224	15408
RGS14	rs4976646	5:176788570	C	T	0.837325	0.947358	0.3125	5	16	0.916818	0.381722	0.593603	0.4	20	50	1.17353	0.340853	5243	15382
RIPK2-OSGIN2	rs7015630	8:90875918	C	T	0.929363	1	0.25	4	16	0.943871	0.502964	0.701765	0.3	21	70	1.13265	0.264867	4071	15370
RNASET2	rs1819333	6:167373547	G	T	0.0152692	0.088361	0.7083	17	24	1.54768	0.647735	0.799477	0.4333	39	90	0.946818	0.457673	7050	15404
RNF186	rs1317209	1:20140036	A	G	0.218643	0.467764	0.2857	8	28	1.50044	0.0564441	0.171765	0.09259	5	54	0.486253	0.190421	2934	15408
RNF186	rs3806308	1:20142866	T	C	0.780351	0.912133	0.4211	16	38	1.05441	0.426146	0.637414	0.45	27	60	1.1269	0.399325	6156	15416
RNF186-OTUD3	rs6426833	1:20171860	G	A	0.200627	0.448236	0.5652	26	46	1.20299	0.846542	0.930499	0.46	46	100	0.979051	0.469843	7229	15386
RTEL1	rs6062496	20:62329099	G	A	0.653018	0.825552	0.375	9	24	0.888008	0.515381	0.710662	0.375	18	48	0.888008	0.422293	6467	15314
RXRA-COL5A1	rs11103429	9:137506578	G	A	0.895647	0.984932	0.06522	3	46	1.03078	0.988852	0.988852	0.06	3	50	0.94832	0.0632698	976	15426
SATB1-AS1-KCNH8	rs13073817	3:18706858	A	G	0.355867	0.614892	0.2727	12	44	0.802737	0.0506095	0.160947	0.2375	19	80	0.69905	0.339747	5209	15332
SATB2	rs1992950	2:200290359	G	A	0.190997	0.435333	0.5	3	6	2.06466	0.905802	0.960205	0.2273	5	22	0.938483	0.24217	3727	15390
SEC11C-GRP	rs1517037	18:56878274	T	C	0.0522928	0.199067	0	0	14	0	0.153588	0.338235	0.1087	5	46	0.571664	0.190139	2927	15394
SFMBT1	rs9847710	3:53062661	C	T	0.977725	1	0.4	4	10	0.981545	0.271653	0.479468	0.3333	18	54	0.817954	0.407521	6253	15344
SKAP2	rs10486483	7:26892440	A	G	0.771183	0.907132	0.2368	9	38	1.08086	0.121137	0.288927	0.2872	27	94	1.31083	0.219124	3371	15384
SLAIN2	rs7438704	4:48363245	A	G	0.801441	0.923034	0.36	18	50	1.04703	0.0154053	0.0738677	0.4608	47	102	1.34015	0.343831	5295	15400
SLAIN2	rs6837335	4:48363983	A	G	0.992181	1	0.3333	2	6	0.970866	0.119411	0.287084	0.5	12	24	1.4563	0.343336	5286	15396
SLC12A9	rs314313	7:100423365	C	T	0.372504	0.635236	0.2308	6	26	0.734222	0.464514	0.671319	0.2679	15	56	0.852222	0.314304	4834	15380
SLC19A3-CCL20	rs1811711	2:228670476	G	C	0.268642	0.509842	0.2609	12	46	1.33955	0.0942787	0.237717	0.2812	18	64	1.44421	0.194744	3001	15410
SLC22A23	rs13204048	6:3420406	C	T	0.459898	0.708926	0.3333	14	42	0.854347	0.289371	0.499704	0.3333	28	84	0.854347	0.390162	5893	15104
SLC26A3-DLD	rs4730273	7:107479519	A	C							0.0241258	0.0978895	0.5	17	34	1.60175	0.312159	4806	15396
SLC26A3-DLD	rs6466198	7:107480126	A	T	0.278437	0.517541	0.4688	15	32	1.25255	0.489881	0.688955	0.4143	29	70	1.10701	0.374237	5764	15402
SLC26A3-DLD	rs4598195	7:107503441	C	A							0.0436332	0.146691	0.6875	11	16	1.60091	0.429443	6616	15406
SLC7A10-CEBPA	rs17694108	19:33731551	A	G	0.50626	0.732975	0.3409	15	44	1.15431	0.0222735	0.0925007	0.402	41	102	1.36103	0.295336	4547	15396
SLC7A10-CEBPA	rs736289	19:33757062	C	T	0.485825	0.719465	0.34	17	50	0.873928	0.161107	0.346773	0.3125	25	80	0.803243	0.389048	5982	15376
SMAD3	rs17293632	15:67442596	T	C	0.654828	0.825552	0.2619	11	42	1.12008	0.0890734	0.22953	0.1538	12	78	0.657949	0.233827	3600	15396
SMAD7	rs7229639	18:46450976	A	G	0.65803	0.826636	0.1176	4	34	1.20865	0.450539	0.657191	0.125	8	64	1.28419	0.097338	1499	15400
SMAD7	rs7351039	18:46460656	A	G	0.480571	0.719465	0.1	3	30	1.46794	0.538611	0.715424	0.04688	3	64	0.688096	0.0681227	1048	15384
SMAD7	rs2337106	18:46460903	C	G	0.883518	0.977907	0.5	12	24	1.03118	0.938842	0.962049	0.4792	23	48	0.988216	0.484881	7312	15080
SMIM20-RBPJ	rs4692386	4:26132361	T	C	0.123105	0.31953	0.5385	14	26	1.39195	0.0802646	0.216285	0.2895	22	76	0.748305	0.386839	5955	15394
SMNDC1-DUSP5	rs11195128	10:112186148	T	C	0.217003	0.467086	0.2	4	20	0.602601	0.489611	0.688955	0.2826	13	46	0.851502	0.331894	5074	15288
SMURF1-KPNA7	rs2395022	7:98750379	A	C	0.348152	0.609237	0	0	22	0	0.147011	0.328448	0	0	40	0	0.046863	723	15428
SOCS1	rs4780355	16:11347858	C	T	0.00837984	0.060369	0.08333	2	24	0.260944	0.180405	0.365994	0.2292	11	48	0.717595	0.319354	4881	15284
SP140	rs6716753	2:231097129	C	T	0.195009	0.441271	0.1053	4	38	0.563328	0.0298301	0.114005	0.09756	8	82	0.522109	0.18686	2881	15418
SPATA31D1-RASEF	rs668853	9:85311147	C	T							0.124557	0.291077	0.25	7	28	0.63751	0.39215	6025	15364
SPATA48	rs12718244	7:50175654	A	G	0.477917	0.719465	0.3333	12	36	0.849167	0.042987	0.145908	0.2593	14	54	0.660463	0.392542	6042	15392
SPATA48-IKZF1	rs1456893	7:50269672	G	A	0.642719	0.819061	0.3571	5	14	1.18555	0.937582	0.962049	0.3056	11	36	1.0143	0.301247	4638	15396
SPRED2-MIR4778	rs6740462	2:65667272	C	A	0.62551	0.800019	0.2391	11	46	0.876166	0.339464	0.542221	0.2308	24	104	0.845531	0.272928	4196	15374
ST7-WNT2	rs38904	7:116892846	C	T	0.816263	0.926498	0.4375	7	16	0.934516	0.310365	0.523286	0.5455	24	44	1.16511	0.468157	7204	15388
ST7-WNT2	rs38911	7:116895163	A	G	0.588926	0.783937	0.4259	23	54	0.919526	0.0858937	0.227974	0.5472	58	106	1.18128	0.463201	7049	15218
STAT3	rs744166	17:40514201	G	A	0.506646	0.732975	0.5	6	12	1.24061	0.0309388	0.116185	0.5789	22	38	1.4365	0.403027	6205	15396
STAT3	rs12942547	17:40527544	G	A	0.438923	0.696697	0.5	8	16	1.24188	0.101263	0.253518	0.5208	25	48	1.29363	0.402615	6189	15372
STAT4	rs1517352	2:191931464	A	C	0.0301874	0.138392	0.52	26	50	1.41281	0.875325	0.947821	0.36	36	100	0.978096	0.368062	5663	15386
TAB2-AS1	rs7758080	6:149577079	G	A	0.666605	0.834291	0.2292	11	48	0.887711	0.945468	0.962049	0.2604	25	96	1.00876	0.258155	3973	15390
TAGLN2	rs12122337	1:159886422	G	A	0.571261	0.777538	0.1	5	50	1.25763	0.190574	0.377935	0.03947	3	76	0.496434	0.0795145	1225	15406
TBC1D1-LINC02513	rs6856616	4:38325036	C	T	0.489155	0.719465	0.1	2	20	1.59031	0.228058	0.428216	0.1034	6	58	1.64515	0.0628809	970	15426
TET2	rs2189234	4:106075498	T	G	0.11635	0.308933	0.5	14	28	1.41462	0.122456	0.290115	0.4375	35	80	1.23779	0.353453	5446	15408
TEX41	rs11681525	2:145492382	G	C	0.582549	0.778938	0.06897	4	58	0.75036	0.2836	0.493156	0.1226	13	106	1.33437	0.0919098	1411	15352
THADA	rs10495903	2:43806918	T	C	0.449534	0.698999	0.08333	4	48	0.68976	0.696242	0.835964	0.1064	10	94	0.880545	0.120815	1862	15412
THEMIS-PTPRK	rs13204742	6:128245765	T	G	0.671797	0.834291	0.1471	5	34	1.17495	0.851398	0.930499	0.1304	12	92	1.04213	0.125162	1930	15420
THEMIS-PTPRK	rs9491891	6:128277151	G	A	0.117272	0.308933	0.5	2	4	3.39797	0.205923	0.399401	0.2333	7	30	1.58572	0.147147	2269	15420
TM9SF4	rs6142618	20:30725648	A	G	0.530558	0.743203	0.5	6	12	1.22452	0.822763	0.916712	0.4286	12	28	1.04959	0.408322	6280	15380
TMBIM1	rs2382817	2:219151218	A	C	0.0278935	0.134882	0.5714	24	42	1.4244	0.607619	0.772603	0.375	36	96	0.934765	0.40117	6170	15380
TMED10-FOS	rs4899554	14:75701221	T	C	0.227391	0.479612	0.1	3	30	0.536897	0.859327	0.933361	0.1935	12	62	1.03916	0.186255	2862	15366
TMEM135-LINC02711	rs6592362	11:87125438	A	G							0.85142	0.930499	0.3077	8	26	1.05002	0.293034	4518	15418
TNFRSF14	rs10797432	1:2501338	T	C	0.0414235	0.180525	0.2692	7	26	0.573341	0.089081	0.22953	0.3409	15	44	0.725984	0.469582	7194	15320
TNFSF15	rs7848647	9:117569046	T	C	0.0658685	0.229886	0.4737	18	38	1.44159	0.0707559	0.201426	0.4375	28	64	1.33147	0.328584	5051	15372
TNFSF15-TNFSF8	rs11554257	9:117605070	C	T	0.773504	0.907132	0	0	2	0	0.157757	0.341646	0.2143	6	28	1.77799	0.120521	1850	15350
TNXB	rs17207986	6:32079567	C	T	0.066566	0.229886	0	0	46	0	0.118654	0.287084	0.1061	7	66	1.85131	0.0572896	881	15378
TRAF3IP2-AS1	rs3851228	6:111848191	T	A	0.51136	0.73549	0.03125	1	32	0.492188	0.479398	0.682369	0.04167	3	72	0.65625	0.0634921	976	15372
TRAF3IP2-AS1	rs2179070	6:111885752	C	T	0.603528	0.786145	0	0	8	0	0.833181	0.921984	0.06667	2	30	1.08955	0.0611875	944	15428
TRIB1-LINC00861	rs10956252	8:126536137	C	G	0.0530602	0.199258	0.5	26	52	1.36088	0.942903	0.962049	0.3621	21	58	0.985468	0.367408	5650	15378
TRIB1-LINC00861	rs1551398	8:126540051	G	A	0.00893923	0.0606837	0.5789	22	38	1.57592	0.627896	0.782406	0.3382	23	68	0.920689	0.367372	5659	15404
TSPAN14	rs7097656	10:82250831	T	C	0.12598	0.324605	0.119	5	42	0.555676	0.401752	0.616601	0.175	14	80	0.816844	0.214239	3298	15394
TUBD1	rs1292053	17:57963537	G	A	0.0976034	0.291983	0.32	16	50	0.733148	0.0912162	0.233328	0.3571	40	112	0.818246	0.436474	6699	15348
TYK2	rs12720356	19:10469975	C	A	0.809452	0.923034	0.0625	1	16	0.708364	0.51743	0.710711	0.06	3	50	0.680029	0.0882315	1360	15414
UBE2L3	rs2266959	22:21922904	T	G	0.00808498	0.060369	0.04545	2	44	0.24313	0.164058	0.348876	0.1327	13	98	0.709542	0.186956	2878	15394
ZBTB38	rs724016	3:141105570	G	A	0.152741	0.374427	0.5167	31	60	1.21806	0.326094	0.532695	0.4717	50	106	1.11205	0.424172	6528	15390
ZDHHC23	rs1386478	3:113680951	G	A	0.21049	0.464012	0.1944	7	36	0.671701	0.407808	0.622545	0.2424	16	66	0.837446	0.289481	4458	15400
ZFP36L1-ACTN1	rs10142466	14:69271784	G	A	0.543096	0.757759	0.375	3	8	0.765115	0.184573	0.370194	0.3913	18	46	0.798381	0.490122	7542	15388
ZFP90	rs12149608	16:68586504	C	G	0.0471012	0.195609	0.01923	1	52	0.207806	0.0540445	0.168829	0.02941	2	68	0.31782	0.0925422	1427	15420
ZFP91-CNTF-GLYAT	rs11229555	11:58408687	T	G	0.238428	0.486504	0.1579	6	38	0.657717	0.0474781	0.153759	0.1512	13	86	0.629675	0.240065	3697	15400
ZGPAT	rs4809330	20:62349586	A	G	0.0836573	0.259869	0.6667	4	6	2.20585	0.538361	0.715424	0.25	8	32	0.827192	0.302227	4641	15356
ZNF831	rs259964	20:57824309	A	G	0.186465	0.43304	0.5714	24	42	1.22018	0.823008	0.916712	0.4796	47	98	1.02408	0.468315	7198	15370
ZPBP2-GSDMB	rs2872507	17:38040763	A	G	0.599612	0.783937	0.5	12	24	1.12114	0.302689	0.516181	0.5208	25	48	1.16786	0.445974	6868	15400
Gene Name, gene associated with the SNV; RS ID, RS identification number; A1, allele 1 (minor allele based on NFE); A2, allele 2 (major allele); MAF, minor allele frequency; MAC, number of minor alleles observed; N, number of total alleles observed; EF, Early farmers; LF, Late farmers; Pval, P-value; P.adj, P-value adjusted for false discovery rate; NFE, Non-Finish Europeans. Significant findings…
